# Supplementary material for: Regional, functional and transcriptomic decoding of multidimensional brain structure alterations in obsessive-compulsive disorder
Source: Research Square preprint supplement (doi:10.21203/rs.3.rs-6900305/v1), 2025-06-26
Supplement: Supplementary file 2 [file 749c453bc1806266eae9908a.xlsx]

## Sheet: Index
Table S5. Results of linear regression models comparing cortical surface area in regions defined by the HCP-MMP parcellation between all OCD cases and controls.
Table S6. Results of linear regression models comparing cortical thickness in regions defined by the HCP-MMP parcellation between all OCD cases and controls.
Table S7. Results of linear regression models comparing cortical volume in regions defined by the HCP-MMP parcellation between all OCD cases and controls.
Table S8. Results of linear regression models comparing cortical folding index in regions defined by the HCP-MMP parcellation between all OCD cases and controls.
Table S9. Results of linear regression models comparing cortical Gaussian curvature in regions defined by the HCP-MMP parcellation between all OCD cases and controls.
Table S10. Results of linear regression models comparing cortical curvature index in regions defined by the HCP-MMP parcellation between all OCD cases and controls.
Table S11. Results of linear regression models comparing cortical mean curvature in regions defined by the HCP-MMP parcellation between all OCD cases and controls.
Table S12. Results of linear regression models comparing cortical sulcal depth in regions defined by the HCP-MMP parcellation between all OCD cases and controls.
Table S13. Results of linear regression models comparing cortical MIND node degree in regions defined by the HCP-MMP parcellation between all OCD cases and controls.
Table S14. Results of linear regression models comparing vertex-wise subcortical surface area (Jacobian determinant) in seven subcortical structures between all OCD cases and controls.
Table S15. Results of linear regression models comparing vertex-wise subcortical radial distance in seven subcortical structures between all OCD cases and controls.
Table S16. Results of linear regression models comparing region-wise subcortical volume in seven subcortical structures between all OCD cases and controls.
Table S17. Results of linear regression models comparing region-wise scMIND in seven subcortical structures between all OCD cases and controls.
Table S18. Results of linear regression models comparing cortical surface area in regions defined by the HCP-MMP parcellation between unmedicated OCD cases and controls.
Table S19. Results of linear regression models comparing cortical thickness in regions defined by the HCP-MMP parcellation between unmedicated OCD cases and controls.
Table S20. Results of linear regression models comparing cortical volume in regions defined by the HCP-MMP parcellation between unmedicated OCD cases and controls.
Table S21. Results of linear regression models comparing cortical folding index in regions defined by the HCP-MMP parcellation between unmedicated OCD cases and controls.
Table S22. Results of linear regression models comparing cortical Gaussian curvature in regions defined by the HCP-MMP parcellation between unmedicated OCD cases and controls.
Table S23. Results of linear regression models comparing cortical curvature index in regions defined by the HCP-MMP parcellation between unmedicated OCD cases and controls.
Table S24. Results of linear regression models comparing cortical mean curvature in regions defined by the HCP-MMP parcellation between unmedicated OCD cases and controls.
Table S25. Results of linear regression models comparing cortical sulcal depth in regions defined by the HCP-MMP parcellation between unmedicated OCD cases and controls.
Table S26. Results of linear regression models comparing cortical MIND node degree in regions defined by the HCP-MMP parcellation between unmedicated OCD cases and controls.
Table S27. Results of linear regression models comparing vertex-wise subcortical surface area (Jacobian determinant) in seven subcortical structures between unmedicated OCD cases and controls.
Table S28. Results of linear regression models comparing vertex-wise subcortical radial distance in seven subcortical structures between unmedicated OCD cases and controls.
Table S29. Results of linear regression models comparing region-wise subcortical volume in seven subcortical structures between unmedicated OCD cases and controls.
Table S30. Results of linear regression models comparing region-wise scMIND in seven subcortical structures between unmedicated OCD cases and controls.
Table S31. Results of linear regression models comparing cortical surface area in regions defined by the HCP-MMP parcellation between medicated OCD cases and controls.
Table S32. Results of linear regression models comparing cortical thickness in regions defined by the HCP-MMP parcellation between medicated OCD cases and controls.
Table S33. Results of linear regression models comparing cortical volume in regions defined by the HCP-MMP parcellation between medicated OCD cases and controls.
Table S34. Results of linear regression models comparing cortical folding index in regions defined by the HCP-MMP parcellation between medicated OCD cases and controls.
Table S35. Results of linear regression models comparing cortical Gaussian curvature in regions defined by the HCP-MMP parcellation between medicated OCD cases and controls.
Table S36. Results of linear regression models comparing cortical curvature index in regions defined by the HCP-MMP parcellation between medicated OCD cases and controls.
Table S37. Results of linear regression models comparing cortical mean curvature in regions defined by the HCP-MMP parcellation between medicated OCD cases and controls.
Table S38. Results of linear regression models comparing cortical sulcal depth in regions defined by the HCP-MMP parcellation between medicated OCD cases and controls.
Table S39. Results of linear regression models comparing cortical MIND node degree in regions defined by the HCP-MMP parcellation between medicated OCD cases and controls.
Table S40. Results of linear regression models comparing vertex-wise subcortical surface area (Jacobian determinant) in seven subcortical structures between medicated OCD cases and controls.
Table S41. Results of linear regression models comparing vertex-wise subcortical radial distance in seven subcortical structures between medicated OCD cases and controls.
Table S42. Results of linear regression models comparing region-wise subcortical volume in seven subcortical structures between medicated OCD cases and controls.
Table S43. Results of linear regression models comparing region-wise scMIND in seven subcortical structures between medicated OCD cases and controls.
Table S44. Results of differential expression analysis using in vivo dorsolateral prefrontal cortex samples obtained from OCD cases and neurological controls.

## Sheet: Table S5
Table S7: Results of linear regression models comparing cortical surface area in regions defined by the HCP-MMP parcellation between all OCD cases and controls
Region	Beta	Cohen's D	T-statistic	P-value	P-value (FDR)
L 10d	-2.93361	-0.0398948	-1.33802	0.180957	0.364504
L 10pp	-2.13519	-0.055006	-1.84483	0.0651272	0.180398
L 10r	-2.5551	-0.0544873	-1.82744	0.0677002	0.18546
L 10v	-3.4639	-0.0685447	-2.29891	0.0215557	0.0810424
L 11l	-2.61157	-0.0353903	-1.18695	0.235311	0.433425
L 13l	-1.12655	-0.0164961	-0.553257	0.580115	0.749758
L 1	-8.97444	-0.0693724	-2.32667	0.0200271	0.0766507
L 23c	0.137014	0.00224326	0.0752363	0.94003	0.969992
L 23d	-3.11317	-0.0933465	-3.13073	0.00175489	0.011749
L 24dd	-2.44559	-0.0430031	-1.44227	0.149295	0.320504
L 24dv	-0.00336663	-8.98462e-05	-0.00301333	0.997596	0.998859
L 25	-0.953036	-0.0324781	-1.08928	0.27609	0.480307
L 2	-7.89142	-0.0432093	-1.44919	0.147354	0.317678
L 31a	0.258008	0.00718838	0.24109	0.809497	0.899513
L 31pd	2.78278	0.0446679	1.49811	0.134176	0.298264
L 31pv	0.0571707	0.00116782	0.0391674	0.968759	0.984468
L 33pr	0.212616	0.00930838	0.312192	0.754909	0.866838
L 3a	-0.4248	-0.00664767	-0.222955	0.823581	0.90749
L 3b	-9.7547	-0.073325	-2.45923	0.0139608	0.0585003
L 43	-0.192265	-0.00458423	-0.153749	0.877814	0.937409
L 44	-5.50624	-0.0795675	-2.6686	0.00764412	0.0370979
L 45	-7.58486	-0.0792871	-2.65919	0.00786047	0.03789
L 46	2.61409	0.0179943	0.603507	0.546201	0.724752
L 47l	-1.67314	-0.0338519	-1.13535	0.256288	0.458049
L 47m	-0.546254	-0.0241722	-0.810704	0.417578	0.619355
L 47s	-1.08023	-0.0211884	-0.710633	0.477348	0.670533
L 4	-4.40347	-0.0249764	-0.837679	0.402255	0.60598
L 52	-0.838033	-0.0351903	-1.18024	0.237968	0.436628
L 55b	-0.931601	-0.0144741	-0.485444	0.627385	0.783625
L 5L	2.26064	0.0495214	1.66089	0.0968054	0.238222
L 5m	1.46848	0.0454287	1.52362	0.127673	0.288286
L 5mv	1.72399	0.0384167	1.28845	0.197656	0.386625
L 6a	-4.07796	-0.0312282	-1.04736	0.294991	0.500906
L 6d	-0.731022	-0.0107058	-0.359058	0.719568	0.844959
L 6ma	-5.11693	-0.0502282	-1.68459	0.0921365	0.230228
L 6mp	-3.47309	-0.0355599	-1.19263	0.233075	0.430572
L 6r	-1.97623	-0.0202033	-0.677592	0.498065	0.68756
L 6v	-0.18679	-0.00475246	-0.159392	0.873367	0.934801
L 7AL	0.658518	0.00682224	0.22881	0.819027	0.90483
L 7Am	6.71579	0.0743414	2.49332	0.012691	0.0544842
L 7PC	-0.715839	-0.00692115	-0.232127	0.81645	0.903406
L 7PL	0.75845	0.0171876	0.57645	0.56434	0.738168
L 7Pm	2.67936	0.0583247	1.95614	0.0505103	0.150227
L 7m	-0.466016	-0.00713846	-0.239415	0.810794	0.900277
L 8Ad	2.09494	0.0159265	0.534157	0.593259	0.759639
L 8Av	-3.08133	-0.0250428	-0.839905	0.401006	0.604844
L 8BL	-1.36578	-0.0215074	-0.721333	0.470742	0.665059
L 8BM	-6.37284	-0.098309	-3.29716	0.000984223	0.00743116
L 8C	-0.563997	-0.00436214	-0.146301	0.88369	0.940764
L 9-46d	6.33397	0.0391284	1.31232	0.189479	0.375696
L 9a	0.120018	0.0011127	0.0373187	0.970233	0.985397
L 9m	-4.90764	-0.0558657	-1.87367	0.0610408	0.172159
L 9p	0.635695	0.00739294	0.24795	0.804184	0.896503
L A1	-2.5266	-0.0967296	-3.24419	0.00118642	0.0086122
L A4	-5.19303	-0.0744323	-2.49637	0.0125826	0.0541651
L A5	-4.06459	-0.0743457	-2.49346	0.0126859	0.0544717
L AAIC	-1.2101	-0.0394296	-1.32242	0.186095	0.371336
L AIP	0.331434	0.00245289	0.082267	0.934438	0.967293
L AVI	-2.50364	-0.0692607	-2.32292	0.0202277	0.0772192
L DVT	-2.70781	-0.0413329	-1.38626	0.165737	0.343715
L EC	-0.392982	-0.00797591	-0.267502	0.789095	0.887342
L FEF	2.53725	0.0322803	1.08264	0.279026	0.483547
L FFC	0.905617	0.0101311	0.339785	0.734034	0.854035
L FOP1	-0.57467	-0.0258644	-0.867459	0.385737	0.590904
L FOP2	-1.39354	-0.0645639	-2.16539	0.0304097	0.104122
L FOP3	-2.01728	-0.0823318	-2.76131	0.0057803	0.0298856
L FOP4	-4.35454	-0.0892756	-2.99419	0.00276665	0.0168181
L FOP5	-2.75557	-0.0759318	-2.54666	0.0109089	0.0486141
L FST	-1.29743	-0.0187592	-0.629162	0.529275	0.711723
L H	3.15466	0.0537129	1.80146	0.0716965	0.193084
L IFJa	-0.764033	-0.0137967	-0.462726	0.643583	0.794924
L IFJp	0.734991	0.0161365	0.541199	0.588397	0.756073
L IFSa	-6.43561	-0.0577556	-1.93705	0.0528012	0.155134
L IFSp	-3.08297	-0.0449689	-1.5082	0.131572	0.294304
L IP0	-0.334571	-0.00542871	-0.182072	0.855534	0.925214
L IP1	-3.6507	-0.0391428	-1.3128	0.189317	0.3755
L IP2	0.171765	0.00196198	0.0658025	0.947538	0.97379
L IPS1	-0.401016	-0.00625712	-0.209856	0.833789	0.913186
L Ig	-1.37068	-0.0559116	-1.87521	0.0608288	0.17173
L LBelt	-1.59128	-0.0409504	-1.37343	0.169688	0.349138
L LIPd	-2.60223	-0.042274	-1.41782	0.156313	0.330439
L LIPv	-1.38434	-0.0190344	-0.63839	0.523252	0.707128
L LO1	0.349815	0.00812418	0.272475	0.785269	0.885042
L LO2	-0.687766	-0.0172567	-0.578769	0.562774	0.736997
L LO3	-1.44224	-0.0327364	-1.09794	0.27229	0.475948
L MBelt	-3.14344	-0.0858587	-2.8796	0.00400059	0.0224462
L MIP	2.06239	0.0290109	0.97299	0.33061	0.537749
L MI	-0.634228	-0.0158396	-0.531239	0.595279	0.761061
L MST	-1.45432	-0.0279733	-0.938191	0.348197	0.555474
L MT	-1.64848	-0.0416433	-1.39666	0.162583	0.339139
L OFC	-4.39096	-0.049133	-1.64786	0.0994508	0.242789
L OP1	-4.34116	-0.0903406	-3.02991	0.00246009	0.0153482
L OP2-3	-1.27658	-0.0460784	-1.54541	0.122316	0.280007
L OP4	-1.07387	-0.0203784	-0.683466	0.494347	0.684501
L PBelt	-3.59005	-0.0622189	-2.08675	0.0369671	0.120094
L PCV	7.0166	0.0857725	2.87671	0.00403735	0.022603
L PEF	-0.752049	-0.0160206	-0.537311	0.591079	0.75799
L PF	-5.82343	-0.0282795	-0.94846	0.342946	0.550406
L PFcm	-2.73939	-0.0483653	-1.62211	0.104849	0.251798
L PFm	-9.63801	-0.0361152	-1.21126	0.225859	0.421879
L PFop	-1.03713	-0.0146204	-0.490351	0.62391	0.781238
L PFt	-1.46066	-0.012935	-0.433823	0.664438	0.808636
L PGi	-7.87036	-0.046327	-1.55375	0.120314	0.276794
L PGp	-3.38765	-0.0393976	-1.32135	0.186453	0.371772
L PGs	-8.4104	-0.05635	-1.88991	0.0588339	0.16763
L PHA1	2.08698	0.0582121	1.95236	0.0509568	0.151151
L PHA2	1.28151	0.0506359	1.69826	0.0895268	0.22563
L PHA3	-0.07414	-0.00148056	-0.0496561	0.960399	0.980413
L PHT	-5.14748	-0.0443427	-1.4872	0.137031	0.302607
L PH	0.589311	0.00507002	0.170042	0.864984	0.930475
L PIT	-0.400056	-0.0109301	-0.366581	0.713948	0.841203
L PI	-0.466696	-0.0158453	-0.531432	0.595145	0.760941
L POS1	-9.10875	-0.131727	-4.41795	1.01976e-05	0.000182794
L POS2	-0.110115	-0.00110294	-0.0369913	0.970494	0.985529
L PSL	-3.93515	-0.0433908	-1.45527	0.145663	0.315452
L PeEc	-0.995944	-0.00747782	-0.250797	0.801983	0.895142
L Pir	-0.960201	-0.028682	-0.961959	0.336122	0.543279
L PoI1	-0.276591	-0.00863803	-0.289709	0.772052	0.877101
L PoI2	-1.33466	-0.0260459	-0.873547	0.382411	0.587872
L PreS	1.6399	0.0577025	1.93527	0.0530193	0.155614
L ProS	-7.21712	-0.094136	-3.15721	0.00160338	0.0109401
L RI	-1.9127	-0.04335	-1.45391	0.146042	0.315938
L RSC	-2.57586	-0.0607522	-2.03756	0.0416525	0.130838
L SCEF	-7.92656	-0.0969018	-3.24997	0.00116265	0.00847602
L SFL	-3.29573	-0.0442097	-1.48274	0.138213	0.304415
L STGa	-0.164988	-0.00551333	-0.18491	0.853308	0.923929
L STSda	-2.28083	-0.036264	-1.21625	0.223953	0.419578
L STSdp	-2.38077	-0.0317433	-1.06463	0.2871	0.492446
L STSva	-1.09422	-0.0159298	-0.534267	0.593183	0.759598
L STSvp	0.0620184	0.00069973	0.0234681	0.981278	0.991077
L STV	-1.82224	-0.0264529	-0.887198	0.375019	0.580894
L TA2	-0.896057	-0.0309753	-1.03887	0.298919	0.504947
L TE1a	-1.14926	-0.0134118	-0.449817	0.652864	0.800776
L TE1m	-1.91829	-0.0227842	-0.764155	0.444815	0.643473
L TE1p	-8.63214	-0.0560907	-1.88121	0.0600071	0.170042
L TE2a	-5.07994	-0.033183	-1.11292	0.265803	0.468641
L TE2p	-2.69503	-0.030012	-1.00657	0.314198	0.520897
L TF	-4.31791	-0.0371412	-1.24567	0.21295	0.4058
L TGd	-9.16923	-0.0724921	-2.4313	0.0150836	0.0619767
L TGv	-4.59737	-0.0677665	-2.2728	0.0230848	0.0851854
L TPOJ1	0.548848	0.00738704	0.247752	0.804337	0.896618
L TPOJ2	-2.12728	-0.0249407	-0.83648	0.402929	0.606522
L TPOJ3	-2.55977	-0.0444939	-1.49227	0.135698	0.300521
L V1	-13.4438	-0.0303769	-1.0188	0.30835	0.514929
L V2	-1.81146	-0.00665551	-0.223218	0.823376	0.907351
L V3A	2.00369	0.0244311	0.819388	0.412608	0.615078
L V3B	0.646592	0.0156801	0.525891	0.59899	0.763639
L V3CD	-0.339576	-0.0066267	-0.222252	0.824128	0.907826
L V3	2.99914	0.0160975	0.53989	0.589299	0.756731
L V4	1.0655	0.0070708	0.237146	0.812554	0.901234
L V4t	-0.676756	-0.0217216	-0.728515	0.466336	0.661299
L V6A	0.0756071	0.00247518	0.0830147	0.933844	0.967038
L V6	-1.75942	-0.0276923	-0.928765	0.353061	0.560116
L V7	0.249165	0.00736117	0.246885	0.805009	0.896936
L V8	-0.443363	-0.0112485	-0.37726	0.705998	0.836078
L VIP	1.62617	0.0249521	0.836864	0.402713	0.606336
L VMV1	3.50892	0.0763606	2.56104	0.0104682	0.0471617
L VMV2	1.27823	0.0434977	1.45886	0.144673	0.314024
L VMV3	-0.806265	-0.024191	-0.811336	0.417216	0.619045
L VVC	-0.702183	-0.0106883	-0.358472	0.720007	0.845248
L a10p	-1.61154	-0.0297976	-0.999375	0.317666	0.524501
L a24	-1.81451	-0.040604	-1.36181	0.173327	0.354012
L a24pr	0.0469846	0.00149155	0.0500247	0.960105	0.980258
L a32pr	-3.43108	-0.072773	-2.44072	0.0146963	0.0607471
L a47r	-0.878471	-0.010515	-0.352659	0.72436	0.848154
L a9-46v	1.10783	0.0122052	0.409347	0.682304	0.820448
L d23ab	-2.23846	-0.061374	-2.05841	0.039608	0.126151
L d32	-5.86361	-0.0928449	-3.1139	0.00185786	0.012299
L i6-8	-0.528726	-0.00934624	-0.313462	0.753945	0.866285
L p10p	0.462895	0.00709837	0.238071	0.811837	0.900832
L p24	1.47104	0.040576	1.36087	0.173623	0.3544
L p24pr	-0.658062	-0.0200298	-0.671775	0.501762	0.690357
L p32	-2.26482	-0.0644564	-2.16179	0.0306868	0.104813
L p32pr	-2.7567	-0.0542191	-1.81844	0.0690626	0.188123
L p47r	-2.76918	-0.0331255	-1.11099	0.266632	0.469584
L p9-46v	-0.144813	-0.00148208	-0.049707	0.960358	0.980389
L pOFC	-3.42362	-0.0630972	-2.1162	0.0343821	0.113903
L s32	-0.823292	-0.0311471	-1.04464	0.296247	0.502139
L s6-8	-0.694098	-0.0152729	-0.512233	0.608513	0.770411
L v23ab	-3.05251	-0.0960933	-3.22285	0.00127824	0.00913385
R 10d	-2.39511	-0.0460482	-1.5444	0.122561	0.280353
R 10pp	-2.32011	-0.0463339	-1.55398	0.120258	0.276714
R 10r	-2.84901	-0.0763493	-2.56066	0.0104795	0.0471932
R 10v	-2.73859	-0.0638518	-2.14151	0.0322862	0.108809
R 11l	0.313604	0.00359023	0.120412	0.904162	0.95176
R 13l	0.118025	0.00253184	0.0849148	0.932333	0.966361
R 1	-2.39882	-0.0188685	-0.632826	0.52688	0.710023
R 23c	-1.34007	-0.0218304	-0.732164	0.464107	0.659551
R 23d	-3.02114	-0.0758617	-2.54431	0.0109825	0.0488699
R 24dd	-0.534875	-0.00783978	-0.262937	0.792611	0.889285
R 24dv	-1.10137	-0.0213875	-0.717312	0.473219	0.667267
R 25	-1.22183	-0.0473529	-1.58816	0.11232	0.264026
R 2	-2.15706	-0.010769	-0.36118	0.717982	0.84386
R 31a	0.782487	0.022084	0.74067	0.458932	0.655334
R 31pd	1.56937	0.0317478	1.06478	0.287032	0.492387
R 31pv	1.53411	0.0313632	1.05188	0.29291	0.498737
R 33pr	-0.417632	-0.0123607	-0.414563	0.678481	0.817944
R 3a	-0.11977	-0.00192128	-0.0644375	0.948625	0.97448
R 3b	-1.55921	-0.0124253	-0.416728	0.676897	0.816948
R 43	-5.10814	-0.0805022	-2.69994	0.00696098	0.0344483
R 44	-3.40197	-0.0449084	-1.50617	0.132092	0.295139
R 45	-3.38337	-0.0516742	-1.73309	0.083148	0.2141
R 46	6.13981	0.0372944	1.25081	0.211069	0.403498
R 47l	-1.18863	-0.0244839	-0.821161	0.411598	0.614259
R 47m	0.0824317	0.00300148	0.100666	0.91982	0.959989
R 47s	-1.22087	-0.021243	-0.712464	0.476214	0.669554
R 4	2.38065	0.0136186	0.456751	0.647872	0.797678
R 52	-0.368711	-0.0228282	-0.765631	0.443936	0.642698
R 55b	1.08061	0.0225852	0.75748	0.448802	0.646907
R 5L	1.68404	0.0359477	1.20564	0.228019	0.424466
R 5m	0.297464	0.00689543	0.231264	0.81712	0.903811
R 5mv	-0.136757	-0.00242384	-0.0812927	0.935213	0.967555
R 6a	6.52868	0.0542725	1.82023	0.0687896	0.187602
R 6d	5.85824	0.0826409	2.77167	0.00559975	0.0291536
R 6ma	-3.82352	-0.0347033	-1.1639	0.244524	0.444347
R 6mp	-0.936855	-0.00799032	-0.267985	0.788723	0.887159
R 6r	-10.3857	-0.0867238	-2.90861	0.00364812	0.0208891
R 6v	-2.0724	-0.0314828	-1.05589	0.291073	0.496791
R 7AL	0.820616	0.0101867	0.34165	0.73263	0.853144
R 7Am	2.18473	0.0265922	0.89187	0.37251	0.578669
R 7PC	-4.91123	-0.0485434	-1.62809	0.103576	0.249642
R 7PL	0.803395	0.0198654	0.66626	0.505279	0.693077
R 7Pm	1.13117	0.0248961	0.834985	0.40377	0.607286
R 7m	-0.833294	-0.0124474	-0.417471	0.676353	0.816634
R 8Ad	5.62519	0.0462512	1.55121	0.120921	0.277765
R 8Av	-1.43654	-0.0108292	-0.363199	0.716473	0.842896
R 8BL	1.52616	0.0156405	0.524564	0.599912	0.764387
R 8BM	-5.45976	-0.068301	-2.29073	0.0220248	0.0822937
R 8C	-2.815	-0.0241204	-0.80897	0.418575	0.620292
R 9-46d	10.2348	0.0586561	1.96725	0.049215	0.14745
R 9a	0.668276	0.00918247	0.307969	0.75812	0.868641
R 9m	-7.20966	-0.0651147	-2.18387	0.0290234	0.100715
R 9p	3.06829	0.0371278	1.24522	0.213115	0.406019
R A1	-1.17764	-0.065539	-2.1981	0.0279928	0.0981452
R A4	-3.69096	-0.0663333	-2.22474	0.026148	0.0933659
R A5	-4.53616	-0.06717	-2.2528	0.0243197	0.0885324
R AAIC	-1.44359	-0.0386076	-1.29485	0.195438	0.383744
R AIP	-4.70484	-0.0362275	-1.21503	0.22442	0.42011
R AVI	-3.7029	-0.0811078	-2.72026	0.00654811	0.0328603
R DVT	-0.591587	-0.00835964	-0.280372	0.779205	0.881501
R EC	1.91112	0.0561296	1.88252	0.0598301	0.16968
R FEF	7.15779	0.0805979	2.70316	0.00689419	0.0341864
R FFC	-6.16028	-0.0560651	-1.88035	0.0601242	0.170279
R FOP1	-0.979256	-0.0359624	-1.20613	0.227829	0.424242
R FOP2	-1.22183	-0.0561653	-1.88371	0.0596679	0.169348
R FOP3	-1.45171	-0.0778029	-2.60941	0.00909967	0.042395
R FOP4	-2.14435	-0.0581123	-1.94902	0.0513554	0.151997
R FOP5	-3.12762	-0.0734485	-2.46337	0.0138007	0.0580224
R FST	1.14063	0.0182288	0.61137	0.540985	0.720606
R H	3.33972	0.074855	2.51054	0.0120892	0.0525311
R IFJa	-3.43472	-0.0667162	-2.23758	0.025297	0.0911478
R IFJp	-1.83792	-0.0541643	-1.8166	0.069344	0.188578
R IFSa	-2.24705	-0.0207048	-0.694413	0.487459	0.678896
R IFSp	-4.80709	-0.0536733	-1.80014	0.0719055	0.193493
R IP0	-1.91493	-0.0298306	-1.00048	0.317131	0.523968
R IP1	-4.79898	-0.052925	-1.77504	0.0759587	0.201124
R IP2	-5.19282	-0.0543884	-1.82412	0.0682	0.186406
R IPS1	-0.320637	-0.00483839	-0.162274	0.871098	0.933652
R Ig	-1.82289	-0.0862213	-2.89176	0.00384923	0.021783
R LBelt	-1.83986	-0.0546961	-1.83444	0.0666546	0.183384
R LIPd	-1.25494	-0.0218308	-0.732178	0.464098	0.65955
R LIPv	-2.75868	-0.0414494	-1.39016	0.164548	0.341923
R LO1	-1.45467	-0.035293	-1.18369	0.2366	0.434981
R LO2	0.456499	0.0150703	0.505438	0.613276	0.774044
R LO3	-1.88624	-0.0374675	-1.25661	0.208958	0.400929
R MBelt	-1.54649	-0.0616129	-2.06642	0.0388457	0.124403
R MIP	-1.12782	-0.014335	-0.480777	0.630698	0.785988
R MI	-2.08231	-0.0573568	-1.92368	0.0544579	0.158608
R MST	1.48894	0.0247527	0.830175	0.406483	0.609751
R MT	-0.285822	-0.006563	-0.220115	0.825792	0.908666
R OFC	-5.01168	-0.0547095	-1.83489	0.0665879	0.183242
R OP1	-1.95762	-0.0691346	-2.31869	0.0204564	0.0778732
R OP2-3	-0.782574	-0.0360404	-1.20875	0.226822	0.423017
R OP4	-5.83272	-0.094191	-3.15905	0.00159329	0.0108838
R PBelt	-2.1574	-0.0529314	-1.77526	0.075923	0.201051
R PCV	1.31648	0.016152	0.541718	0.588039	0.755743
R PEF	-0.668476	-0.0105033	-0.352269	0.724653	0.848305
R PF	-6.51101	-0.04925	-1.65178	0.0986481	0.241366
R PFcm	-2.8055	-0.0612227	-2.05334	0.0400975	0.127263
R PFm	-14.8498	-0.0624184	-2.09344	0.0363659	0.118655
R PFop	-2.90523	-0.0461122	-1.54655	0.122043	0.2796
R PFt	-5.13744	-0.0491942	-1.64991	0.0990302	0.242043
R PGi	-7.26763	-0.0307774	-1.03224	0.302017	0.50817
R PGp	-6.78466	-0.0560479	-1.87978	0.0602029	0.17044
R PGs	-7.58342	-0.0586926	-1.96848	0.049074	0.147153
R PHA1	0.928048	0.0308082	1.03327	0.301533	0.507687
R PHA2	0.6796	0.0264955	0.888626	0.374252	0.580183
R PHA3	0.189924	0.00538114	0.180477	0.856786	0.925819
R PHT	-3.94917	-0.0389724	-1.30709	0.19125	0.37814
R PH	-2.17931	-0.022415	-0.751771	0.452228	0.64961
R PIT	-1.11369	-0.0253313	-0.849581	0.395603	0.600015
R PI	-0.646501	-0.0219494	-0.736158	0.461673	0.657512
R POS1	-5.30003	-0.0749168	-2.51262	0.0120185	0.0522997
R POS2	2.53209	0.0238518	0.799961	0.423776	0.624933
R PSL	-3.21624	-0.0424462	-1.42359	0.154634	0.328122
R PeEc	1.47985	0.0148726	0.49881	0.617938	0.777357
R Pir	-1.57877	-0.0357751	-1.19985	0.230259	0.427074
R PoI1	-1.15393	-0.0391683	-1.31366	0.189028	0.375117
R PoI2	-2.84862	-0.0544759	-1.82705	0.0677575	0.185567
R PreS	0.723056	0.0317217	1.06391	0.287428	0.492827
R ProS	-5.97772	-0.0995521	-3.33885	0.000848067	0.00658825
R RI	-1.9287	-0.0539346	-1.8089	0.0705332	0.190845
R RSC	-1.50572	-0.0334976	-1.12347	0.261299	0.463398
R SCEF	-2.43258	-0.0375687	-1.26001	0.207731	0.399336
R SFL	-2.89429	-0.0493299	-1.65446	0.0981027	0.24044
R STGa	-0.0773432	-0.00254792	-0.085454	0.931904	0.966184
R STSda	-3.41555	-0.0441998	-1.48241	0.138302	0.304561
R STSdp	-2.49878	-0.0353191	-1.18456	0.236254	0.434604
R STSva	-0.769508	-0.0128435	-0.430755	0.666667	0.810155
R STSvp	-3.4408	-0.0507697	-1.70275	0.0886831	0.224146
R STV	-4.48904	-0.0544108	-1.82487	0.0680862	0.18619
R TA2	-1.82919	-0.0530824	-1.78032	0.0750912	0.19948
R TE1a	-0.222502	-0.00323301	-0.108431	0.913659	0.956736
R TE1m	-0.155991	-0.00214845	-0.0720565	0.94256	0.971344
R TE1p	-6.16137	-0.0427034	-1.43222	0.15215	0.324625
R TE2a	-2.9813	-0.0193379	-0.648571	0.516649	0.701972
R TE2p	-2.14351	-0.0225385	-0.755914	0.44974	0.64758
R TF	-2.53471	-0.0187125	-0.627593	0.530302	0.71256
R TGd	-10.5257	-0.0831137	-2.78753	0.00533337	0.0280665
R TGv	-2.01642	-0.0280672	-0.941338	0.346582	0.553835
R TPOJ1	-5.29814	-0.0435535	-1.46073	0.144158	0.313305
R TPOJ2	0.0698074	0.00073304	0.0245853	0.980387	0.990693
R TPOJ3	0.873295	0.0115728	0.388139	0.697932	0.830855
R V1	-20.2545	-0.042762	-1.43419	0.151589	0.323784
R V2	-3.56277	-0.0126828	-0.425364	0.670591	0.812566
R V3A	0.907206	0.0103833	0.348242	0.727675	0.850038
R V3B	0.22624	0.00525211	0.176149	0.860185	0.927769
R V3CD	-0.684459	-0.0130322	-0.437084	0.662071	0.806992
R V3	2.8177	0.0143785	0.482236	0.629662	0.785252
R V4	0.295403	0.0022732	0.0762403	0.939231	0.969523
R V4t	0.519923	0.0179307	0.601374	0.547621	0.725842
R V6A	1.15232	0.0369542	1.2394	0.215262	0.4087
R V6	1.35189	0.0193735	0.649764	0.515878	0.701322
R V7	1.17699	0.0313105	1.05012	0.29372	0.499594
R V8	-0.260647	-0.00600435	-0.201378	0.840412	0.917045
R VIP	0.320263	0.00678385	0.227522	0.820028	0.905373
R VMV1	0.320475	0.00622559	0.208799	0.834615	0.913643
R VMV2	-0.358207	-0.00979869	-0.328636	0.742446	0.859364
R VMV3	-0.474163	-0.0122206	-0.409864	0.681925	0.82021
R VVC	-2.27976	-0.0356544	-1.1958	0.231836	0.428979
R a10p	-0.578218	-0.0114931	-0.385465	0.699911	0.832091
R a24	-2.19987	-0.0560888	-1.88115	0.060016	0.170058
R a24pr	-0.763415	-0.0245645	-0.823862	0.410061	0.612934
R a32pr	-2.41149	-0.0556471	-1.86633	0.0620594	0.174187
R a47r	0.756891	0.00813012	0.272674	0.785116	0.884985
R a9-46v	2.24868	0.0293881	0.985639	0.324363	0.53126
R d23ab	-1.00553	-0.0400173	-1.34213	0.179621	0.362706
R d32	-3.47424	-0.0526194	-1.76479	0.0776664	0.204174
R i6-8	-0.488282	-0.00836467	-0.280541	0.779075	0.881407
R p10p	0.131996	0.00172668	0.0579106	0.953822	0.97706
R p24	-1.71317	-0.0456739	-1.53185	0.125631	0.285188
R p24pr	-2.58579	-0.059109	-1.98244	0.0474903	0.143718
R p32	-3.9508	-0.0884046	-2.96498	0.00304283	0.0181236
R p32pr	-1.49123	-0.0283903	-0.952178	0.341058	0.548365
R p47r	-0.53608	-0.00778214	-0.261003	0.794102	0.890176
R p9-46v	-0.95038	-0.00678229	-0.22747	0.820069	0.905395
R pOFC	-0.9972	-0.014745	-0.49453	0.620956	0.779276
R s32	-2.14874	-0.0717972	-2.40799	0.0160804	0.0650425
R s6-8	-1.73256	-0.0264813	-0.888152	0.374506	0.580402
R v23ab	-1.33872	-0.0399991	-1.34152	0.179819	0.362949

## Sheet: Table S6
Table S8: Results of linear regression models comparing cortical thickness in regions defined by the HCP-MMP parcellation between all OCD cases and controls
Region	Beta	Cohen's D	T-statistic	P-value	P-value (FDR)
L 10d	-0.0153339	-0.0727077	-2.43853	0.0147855	0.0610149
L 10pp	-0.0136542	-0.0527041	-1.76763	0.0771903	0.203319
L 10r	-0.01298	-0.0491583	-1.64871	0.099277	0.242502
L 10v	-0.0153943	-0.0759608	-2.54763	0.0108786	0.048513
L 11l	-0.0171028	-0.0756152	-2.53604	0.0112448	0.0497127
L 13l	-0.0265159	-0.126145	-4.23076	2.37521e-05	0.000364185
L 1	-0.00880255	-0.0487573	-1.63526	0.102064	0.247141
L 23c	-0.00664044	-0.0412265	-1.38269	0.166829	0.345187
L 23d	-0.00190966	-0.00826715	-0.27727	0.781585	0.882999
L 24dd	-0.0131225	-0.0663101	-2.22396	0.0262005	0.0934817
L 24dv	-0.0127251	-0.0625892	-2.09917	0.0358577	0.117444
L 25	-0.00886143	-0.026403	-0.885523	0.375922	0.581788
L 2	-0.0086847	-0.0603112	-2.02277	0.0431562	0.134269
L 31a	0.00520311	0.0196756	0.659896	0.509354	0.696283
L 31pd	-0.0165751	-0.0920297	-3.08656	0.00203713	0.013231
L 31pv	-0.010867	-0.0609394	-2.04383	0.041028	0.129402
L 33pr	-0.016741	-0.0492026	-1.65019	0.0989728	0.241935
L 3a	-0.00138144	-0.0114587	-0.384311	0.700766	0.832626
L 3b	0.002107	0.0159956	0.536474	0.591657	0.758455
L 43	-0.01106	-0.0433331	-1.45334	0.1462	0.31614
L 44	-0.0140072	-0.0635092	-2.13002	0.0332237	0.111104
L 45	-0.0101517	-0.0574257	-1.92599	0.0541686	0.158005
L 46	-0.0122278	-0.0711583	-2.38656	0.0170477	0.0680078
L 47l	-0.00916374	-0.0428004	-1.43547	0.151221	0.323276
L 47m	-0.0278439	-0.101954	-3.41941	0.000633122	0.00521428
L 47s	-0.0130343	-0.052564	-1.76293	0.0779794	0.204735
L 4	-0.00926325	-0.0498751	-1.67275	0.094446	0.234254
L 52	-0.019831	-0.0891154	-2.98882	0.00281566	0.0170429
L 55b	-0.0123484	-0.0485026	-1.62672	0.103867	0.250154
L 5L	-0.00453281	-0.0240155	-0.805452	0.420601	0.622123
L 5m	-0.00488423	-0.0238072	-0.798463	0.424644	0.62578
L 5mv	-0.017458	-0.104972	-3.52065	0.000434751	0.00384424
L 6a	-0.0160002	-0.103338	-3.46584	0.000533507	0.00453413
L 6d	-0.0143898	-0.054662	-1.8333	0.0668243	0.183738
L 6ma	-0.0160226	-0.079186	-2.6558	0.00793982	0.0381764
L 6mp	-0.00375638	-0.0163406	-0.548045	0.583688	0.752471
L 6r	-0.0207103	-0.119491	-4.00759	6.23313e-05	0.000796803
L 6v	-0.0251127	-0.0954843	-3.20243	0.00137222	0.00966211
L 7AL	-0.00937254	-0.0476833	-1.59924	0.109837	0.260114
L 7Am	-0.0222668	-0.108808	-3.6493	0.000265932	0.00258877
L 7PC	-0.014807	-0.0759395	-2.54692	0.0109008	0.0485855
L 7PL	-0.0186997	-0.0737991	-2.47513	0.0133552	0.0566306
L 7Pm	-0.0155349	-0.057865	-1.94072	0.0523544	0.154157
L 7m	-0.0212227	-0.101548	-3.40581	0.000665445	0.00542583
L 8Ad	-0.0129212	-0.0792664	-2.6585	0.00787666	0.0379462
L 8Av	-0.00845859	-0.0423767	-1.42126	0.155309	0.32899
L 8BL	-0.0136579	-0.0537182	-1.80164	0.0716683	0.193035
L 8BM	-0.00580425	-0.0239378	-0.802844	0.422107	0.623436
L 8C	-0.00974794	-0.060618	-2.03305	0.0421054	0.131884
L 9-46d	-0.0103433	-0.0717918	-2.40781	0.0160885	0.065072
L 9a	-0.0146506	-0.0839377	-2.81517	0.00489632	0.0262454
L 9m	-0.00643256	-0.0328972	-1.10333	0.269942	0.473283
L 9p	-0.014483	-0.0758778	-2.54485	0.0109656	0.0488087
L A1	-0.0106829	-0.0445092	-1.49279	0.135563	0.300306
L A4	0.00297569	0.0134451	0.450932	0.65206	0.800327
L A5	-0.00700024	-0.0303592	-1.01821	0.308632	0.515211
L AAIC	-0.00441815	-0.0138215	-0.463555	0.642989	0.79447
L AIP	-0.0138522	-0.0891357	-2.9895	0.00280941	0.0170186
L AVI	-0.00681683	-0.0324877	-1.0896	0.275949	0.480164
L DVT	-0.010603	-0.0591622	-1.98423	0.0472911	0.143294
L EC	-0.00684624	-0.0224448	-0.752772	0.451626	0.649157
L FEF	-0.0242361	-0.112214	-3.76351	0.000169676	0.00179524
L FFC	-0.00489509	-0.0241352	-0.809466	0.41829	0.620012
L FOP1	-0.029879	-0.118921	-3.98847	6.75546e-05	0.000850715
L FOP2	-0.00941549	-0.0439916	-1.47542	0.140168	0.307445
L FOP3	-0.00946466	-0.0573483	-1.92339	0.0544939	0.158678
L FOP4	-0.0125249	-0.0736483	-2.47007	0.0135453	0.0572233
L FOP5	-0.00852996	-0.0460606	-1.54482	0.122461	0.280218
L FST	-0.00362071	-0.018027	-0.604604	0.545472	0.724174
L H	-0.000724097	-0.0123026	-0.412613	0.679909	0.818887
L IFJa	-0.0110961	-0.0566384	-1.89958	0.0575518	0.16494
L IFJp	-0.0096389	-0.0480878	-1.61281	0.106857	0.255128
L IFSa	-0.0158936	-0.0931246	-3.12329	0.00179976	0.0119922
L IFSp	-0.0110382	-0.0569261	-1.90923	0.0562956	0.162313
L IP0	-0.0123877	-0.0753809	-2.52818	0.0114993	0.0505634
L IP1	-0.0184069	-0.10733	-3.59972	0.000321986	0.00302397
L IP2	-0.00603574	-0.0347384	-1.16508	0.244047	0.443809
L IPS1	-0.00957771	-0.0525775	-1.76339	0.0779029	0.204596
L Ig	-0.0106781	-0.0535733	-1.79678	0.072437	0.194483
L LBelt	-0.000380508	-0.00164823	-0.0552796	0.955918	0.97812
L LIPd	-0.00975478	-0.0536578	-1.79962	0.0719877	0.193656
L LIPv	-0.0061261	-0.0298919	-1.00254	0.316138	0.522918
L LO1	-0.00340702	-0.0156903	-0.526233	0.598752	0.763533
L LO2	-0.000615695	-0.00218747	-0.0733649	0.941519	0.970773
L LO3	-0.0171386	-0.0721541	-2.41996	0.0155615	0.0634852
L MBelt	-0.00752627	-0.0359265	-1.20493	0.228294	0.424767
L MIP	-0.00798097	-0.0470808	-1.57903	0.114398	0.267385
L MI	-0.00790416	-0.0329502	-1.10511	0.269171	0.472406
L MST	-0.0120766	-0.0598919	-2.0087	0.0446282	0.137475
L MT	-0.0122197	-0.0523358	-1.75528	0.0792792	0.207154
L OFC	-0.00282257	-0.0154237	-0.517292	0.604978	0.767867
L OP1	0.00644952	0.0267726	0.897919	0.369277	0.575525
L OP2-3	-0.00903126	-0.0401785	-1.34754	0.177875	0.360256
L OP4	-0.00246547	-0.0120666	-0.404699	0.685718	0.822713
L PBelt	0.00298332	0.0137913	0.462543	0.643714	0.794978
L PCV	-0.00274031	-0.0134386	-0.450713	0.652218	0.800445
L PEF	-0.0127283	-0.0478022	-1.60323	0.108954	0.258655
L PF	-0.00703359	-0.0395723	-1.32721	0.184508	0.369256
L PFcm	-0.00226515	-0.0117132	-0.392846	0.694452	0.828547
L PFm	-0.0141843	-0.0839857	-2.81678	0.00487187	0.0261523
L PFop	-0.019378	-0.0841703	-2.82297	0.00477897	0.0257636
L PFt	-0.011758	-0.0642541	-2.155	0.0312144	0.106164
L PGi	-0.0130513	-0.0838178	-2.81115	0.00495782	0.0265025
L PGp	-0.0170547	-0.08024	-2.69115	0.00714684	0.0351653
L PGs	-0.0162715	-0.0863035	-2.89451	0.00381567	0.0216309
L PHA1	-0.00927594	-0.0311922	-1.04615	0.295549	0.501414
L PHA2	-0.00271993	-0.0118129	-0.396192	0.691982	0.826926
L PHA3	-0.00248805	-0.0137147	-0.459974	0.645557	0.796208
L PHT	-0.0107031	-0.0512988	-1.7205	0.08541	0.218216
L PH	-0.019569	-0.111344	-3.73435	0.000190522	0.00197261
L PIT	-0.00551832	-0.0178439	-0.598461	0.549562	0.727348
L PI	-0.00999622	-0.0371916	-1.24736	0.21233	0.405056
L POS1	-0.00864932	-0.0428005	-1.43548	0.151221	0.323276
L POS2	-0.0122937	-0.0664007	-2.227	0.0259966	0.0929968
L PSL	-0.00743877	-0.0334899	-1.12321	0.261409	0.463558
L PeEc	-0.0116128	-0.0443184	-1.48639	0.137247	0.302924
L Pir	-0.0270748	-0.0825057	-2.76714	0.00567805	0.029467
L PoI1	-0.0176609	-0.0596134	-1.99936	0.0456291	0.139725
L PoI2	-0.0259296	-0.0813686	-2.729	0.00637724	0.0322128
L PreS	0.000490667	0.00230624	0.0773485	0.93835	0.969131
L ProS	0.00243297	0.00984596	0.330221	0.741248	0.858708
L RI	-0.00374518	-0.019348	-0.648908	0.516431	0.701807
L RSC	-0.00206812	-0.00789622	-0.26483	0.791153	0.88851
L SCEF	-0.00780813	-0.0357529	-1.19911	0.230549	0.427447
L SFL	-0.0112074	-0.0484793	-1.62594	0.104033	0.250429
L STGa	-0.016056	-0.0478344	-1.60431	0.108716	0.258206
L STSda	-0.0173777	-0.0680469	-2.28221	0.0225234	0.0836867
L STSdp	-0.00689048	-0.0401521	-1.34665	0.178159	0.360629
L STSva	-0.00771919	-0.0397897	-1.3345	0.182108	0.366066
L STSvp	-0.0104319	-0.0575318	-1.92955	0.0537257	0.157111
L STV	-0.0141161	-0.0572997	-1.92176	0.0546988	0.159097
L TA2	-0.00549359	-0.0201731	-0.676582	0.498706	0.688079
L TE1a	-0.0180169	-0.0804016	-2.69657	0.00703177	0.0347202
L TE1m	-0.0060272	-0.02496	-0.837127	0.402565	0.606262
L TE1p	-0.0142399	-0.0723255	-2.42571	0.0153175	0.0627153
L TE2a	-0.00213111	-0.010601	-0.355546	0.722197	0.846738
L TE2p	-0.0142315	-0.0712974	-2.39123	0.0168328	0.0673484
L TF	-0.0119555	-0.0562194	-1.88553	0.0594223	0.168812
L TGd	-0.00919973	-0.0388606	-1.30334	0.192526	0.379766
L TGv	-0.0135284	-0.0491909	-1.6498	0.0990532	0.24208
L TPOJ1	-0.010414	-0.0562871	-1.8878	0.0591166	0.168209
L TPOJ2	-0.0103484	-0.0508061	-1.70397	0.0884547	0.223723
L TPOJ3	-0.00773031	-0.033111	-1.1105	0.266841	0.469789
L V1	-0.00123947	-0.0113354	-0.380175	0.703833	0.834637
L V2	-0.00364825	-0.03128	-1.04909	0.294191	0.500055
L V3A	-0.00685385	-0.035	-1.17386	0.240515	0.439658
L V3B	-0.0121425	-0.0678334	-2.27505	0.0229497	0.0848241
L V3CD	-0.0191028	-0.0882608	-2.96016	0.0030908	0.0183401
L V3	-0.00281466	-0.022216	-0.745096	0.456253	0.653151
L V4	-0.00894261	-0.0674522	-2.26227	0.0237284	0.0869352
L V4t	-0.00401438	-0.0147549	-0.494861	0.620722	0.779141
L V6A	-0.0124959	-0.0443408	-1.48714	0.137048	0.302622
L V6	-0.0143225	-0.0821057	-2.75372	0.00591573	0.030435
L V7	-0.0131569	-0.0598188	-2.00625	0.0448894	0.138087
L V8	-0.00985767	-0.0454901	-1.52568	0.127159	0.287454
L VIP	-0.00244442	-0.0100021	-0.335457	0.737296	0.856249
L VMV1	-0.00765948	-0.0267162	-0.89603	0.370285	0.576567
L VMV2	-0.000773905	-0.00343666	-0.115261	0.908243	0.953704
L VMV3	-0.00065779	-0.00305374	-0.102419	0.918429	0.959263
L VVC	-0.011045	-0.0533904	-1.79065	0.0734164	0.196294
L a10p	-0.0152898	-0.0813033	-2.72681	0.00641966	0.0323768
L a24	-0.0188691	-0.0688171	-2.30804	0.0210418	0.0795616
L a24pr	0.00901534	0.0295617	0.991463	0.321513	0.528444
L a32pr	-0.00779417	-0.0350663	-1.17608	0.239625	0.438599
L a47r	-0.0183922	-0.0959171	-3.21694	0.00130479	0.00928166
L a9-46v	-0.0124797	-0.0704855	-2.364	0.0181211	0.0711578
L d23ab	-0.012194	-0.0522825	-1.75349	0.0795859	0.207707
L d32	-0.00812101	-0.0355447	-1.19213	0.233275	0.430811
L i6-8	-0.00925281	-0.045582	-1.52876	0.126393	0.286334
L p10p	-0.00864011	-0.0481575	-1.61514	0.10635	0.254326
L p24	0.00653473	0.0199433	0.668873	0.503611	0.691914
L p24pr	-0.0118622	-0.0499374	-1.67484	0.0940351	0.23351
L p32	-0.00790389	-0.0329121	-1.10383	0.269725	0.473026
L p32pr	-0.0127751	-0.0624416	-2.09421	0.0362965	0.118489
L p47r	-0.0198651	-0.108775	-3.64818	0.000267083	0.00259816
L p9-46v	-0.0106799	-0.0636993	-2.1364	0.0327008	0.109805
L pOFC	2.59845e-05	0.000107442	0.00360346	0.997125	0.998656
L s32	-0.0124193	-0.0350487	-1.17549	0.23986	0.43881
L s6-8	-0.00491023	-0.0194067	-0.650877	0.515159	0.700781
L v23ab	-0.00119394	-0.00471149	-0.158018	0.87445	0.935419
R 10d	-0.0146102	-0.0635979	-2.133	0.0329788	0.11051
R 10pp	-0.000718881	-0.00306968	-0.102953	0.918005	0.959058
R 10r	-0.0113032	-0.04074	-1.36637	0.171891	0.352059
R 10v	-0.0071807	-0.0314448	-1.05462	0.291656	0.497397
R 11l	-0.025963	-0.117993	-3.95733	7.69557e-05	0.000945635
R 13l	-0.026785	-0.119044	-3.99258	6.63966e-05	0.00083901
R 1	0.0011454	0.00613224	0.205668	0.83706	0.915139
R 23c	-0.0113272	-0.0732972	-2.4583	0.0139971	0.0586281
R 23d	-0.0095658	-0.0419095	-1.4056	0.159913	0.335354
R 24dd	-0.00403896	-0.0203541	-0.682651	0.494862	0.684951
R 24dv	-0.00296349	-0.0143574	-0.481531	0.630163	0.785593
R 25	-0.000130113	-0.000391949	-0.0131455	0.989512	0.995089
R 2	-0.00275604	-0.0185758	-0.623011	0.533309	0.714695
R 31a	-0.0101939	-0.040946	-1.37328	0.169734	0.349183
R 31pd	-0.0211473	-0.111354	-3.73469	0.000190269	0.0019707
R 31pv	-0.0123793	-0.0672869	-2.25672	0.0240733	0.0878838
R 33pr	-0.0223618	-0.0696386	-2.33559	0.019556	0.0752929
R 3a	0.00189738	0.0151198	0.5071	0.61211	0.773132
R 3b	0.00675367	0.0423875	1.42163	0.155204	0.328844
R 43	-0.00694638	-0.0296869	-0.995664	0.319467	0.526316
R 44	-0.0228095	-0.102362	-3.43308	0.000602131	0.0050083
R 45	-0.0105584	-0.0535556	-1.79619	0.0725312	0.194661
R 46	-0.0179745	-0.11017	-3.69496	0.000222531	0.00223573
R 47l	-0.0115482	-0.0533566	-1.78951	0.073599	0.196649
R 47m	-0.0391662	-0.163578	-5.48621	4.33115e-08	2.28022e-06
R 47s	-0.0231155	-0.0880139	-2.95188	0.00317472	0.0187311
R 4	-0.00804992	-0.0403249	-1.35245	0.1763	0.35818
R 52	-0.0135544	-0.0552571	-1.85326	0.0639108	0.177944
R 55b	-0.0258195	-0.0901214	-3.02256	0.00252054	0.0156388
R 5L	-0.0109827	-0.0574938	-1.92827	0.0538839	0.157462
R 5m	-0.00677323	-0.0358807	-1.20339	0.228887	0.425454
R 5mv	-0.00968513	-0.0582954	-1.95516	0.0506261	0.150473
R 6a	-0.0109428	-0.0662618	-2.22234	0.0263097	0.0937936
R 6d	-0.0192453	-0.0667665	-2.23927	0.0251871	0.0908811
R 6ma	-0.00103908	-0.00526845	-0.176698	0.859754	0.927602
R 6mp	-0.0164975	-0.0682767	-2.28992	0.0220721	0.0824031
R 6r	-0.0186522	-0.105724	-3.54584	0.000395338	0.00355791
R 6v	-0.0224238	-0.085028	-2.85174	0.00436787	0.024011
R 7AL	-0.0106738	-0.0536668	-1.79992	0.0719401	0.193563
R 7Am	-0.0199807	-0.0945841	-3.17223	0.00152285	0.010502
R 7PC	-0.0161092	-0.0860276	-2.88526	0.00392942	0.0221311
R 7PL	-0.0150802	-0.0605783	-2.03172	0.0422403	0.132173
R 7Pm	-0.0206451	-0.0732304	-2.45606	0.0140845	0.0589029
R 7m	-0.00828844	-0.0400582	-1.3435	0.179177	0.36209
R 8Ad	-0.00862173	-0.049438	-1.65809	0.0973691	0.239196
R 8Av	-0.0120772	-0.0641765	-2.1524	0.0314185	0.106716
R 8BL	-0.00730295	-0.0343321	-1.15146	0.249605	0.450345
R 8BM	-0.00301632	-0.0125661	-0.421453	0.673444	0.81469
R 8C	-0.0124515	-0.0761746	-2.5548	0.0106574	0.0477832
R 9-46d	-0.00620212	-0.040819	-1.36902	0.171061	0.350942
R 9a	-0.0145117	-0.0716391	-2.40269	0.0163152	0.0657793
R 9m	-0.00639507	-0.032035	-1.07441	0.282694	0.48773
R 9p	-0.0131327	-0.067114	-2.25092	0.0244384	0.0888221
R A1	-0.00279199	-0.0106854	-0.358376	0.720079	0.845281
R A4	0.000367342	0.00171261	0.0574388	0.954198	0.977264
R A5	-0.0050508	-0.0235842	-0.790986	0.428994	0.629541
R AAIC	-0.00303917	-0.00953561	-0.319813	0.749125	0.863455
R AIP	-0.00750084	-0.0481282	-1.61416	0.106562	0.254683
R AVI	-0.0122623	-0.0568589	-1.90698	0.056587	0.162906
R DVT	-0.0105808	-0.0612541	-2.05439	0.0399957	0.127023
R EC	-0.00761405	-0.0223877	-0.750855	0.452779	0.650153
R FEF	-0.0179039	-0.0719768	-2.41401	0.0158174	0.0642499
R FFC	-0.0122696	-0.0627584	-2.10484	0.0353604	0.116265
R FOP1	-0.01949	-0.0802723	-2.69224	0.00712367	0.0350773
R FOP2	-0.00862652	-0.0421901	-1.41501	0.157136	0.33152
R FOP3	-0.00249111	-0.0139553	-0.468045	0.639775	0.792121
R FOP4	-0.011035	-0.0607833	-2.0386	0.0415484	0.130581
R FOP5	-0.0129867	-0.0702087	-2.35471	0.0185796	0.0725167
R FST	-0.00702437	-0.0320848	-1.07608	0.281947	0.486869
R H	0.001524	0.0185282	0.621413	0.534359	0.715559
R IFJa	-0.011958	-0.0554988	-1.86136	0.0627582	0.175556
R IFJp	-0.0170504	-0.0828691	-2.77933	0.00546971	0.0286243
R IFSa	-0.0203903	-0.110897	-3.71934	0.000202168	0.00207057
R IFSp	-0.0102497	-0.05553	-1.86241	0.0626103	0.175237
R IP0	-0.0131325	-0.0808733	-2.71239	0.00670529	0.0334565
R IP1	-0.0132588	-0.0769948	-2.58231	0.00984535	0.0449842
R IP2	-0.0104883	-0.0608254	-2.04001	0.0414075	0.130258
R IPS1	-0.0113372	-0.0619735	-2.07852	0.0377183	0.121857
R Ig	-0.0161175	-0.0730359	-2.44953	0.0143419	0.0596712
R LBelt	-0.0114805	-0.0447424	-1.50061	0.133528	0.2974
R LIPd	-0.00950215	-0.04867	-1.63233	0.102679	0.248146
R LIPv	0.00123008	0.0056903	0.190846	0.848655	0.921388
R LO1	-0.000138195	-0.000630629	-0.0211505	0.983127	0.991981
R LO2	-0.0161452	-0.0575817	-1.93122	0.0535186	0.156697
R LO3	-0.00446161	-0.018814	-0.631	0.528072	0.710926
R MBelt	-0.0118864	-0.0534995	-1.79431	0.072831	0.195186
R MIP	-0.0150232	-0.085003	-2.8509	0.00437941	0.0240622
R MI	-0.0196017	-0.0808685	-2.71223	0.00670856	0.033466
R MST	-0.00768527	-0.0393587	-1.32004	0.186888	0.372313
R MT	-0.00677492	-0.0295844	-0.992224	0.321141	0.52806
R OFC	-0.00785547	-0.0422808	-1.41805	0.156247	0.330326
R OP1	-0.0107402	-0.0390313	-1.30906	0.19058	0.377184
R OP2-3	-0.0189788	-0.0863075	-2.89465	0.00381403	0.0216236
R OP4	0.000418351	0.00202516	0.0679214	0.945851	0.973013
R PBelt	-0.0111093	-0.0503036	-1.68712	0.0916488	0.229343
R PCV	-0.00628345	-0.0316404	-1.06118	0.288664	0.494131
R PEF	-0.0215722	-0.0843025	-2.8274	0.00471338	0.0254849
R PF	-0.00687632	-0.0385974	-1.29451	0.195556	0.383898
R PFcm	-0.00820844	-0.0406185	-1.3623	0.173173	0.353844
R PFm	-0.0121657	-0.0762261	-2.55653	0.0106046	0.0476297
R PFop	-0.00901559	-0.0364578	-1.22275	0.221488	0.41643
R PFt	-0.00528816	-0.0256922	-0.861687	0.388906	0.593835
R PGi	-0.0142659	-0.0903392	-3.02987	0.00246047	0.0153495
R PGp	-0.00864478	-0.044536	-1.49368	0.135328	0.299979
R PGs	-0.0133338	-0.0662711	-2.22265	0.0262887	0.0937327
R PHA1	-0.00740294	-0.0240105	-0.805284	0.420698	0.622224
R PHA2	-0.00443381	-0.0200265	-0.671664	0.501832	0.690426
R PHA3	0.000961978	0.0052217	0.175129	0.860986	0.928174
R PHT	-0.0192819	-0.0888985	-2.98155	0.00288329	0.0173632
R PH	-0.016677	-0.0803446	-2.69466	0.00707213	0.0348813
R PIT	-0.0105154	-0.0362749	-1.21662	0.223814	0.419409
R PI	-0.013008	-0.0515771	-1.72983	0.0837288	0.215135
R POS1	-0.00673227	-0.0327796	-1.09939	0.271658	0.475248
R POS2	-0.013502	-0.0790617	-2.65163	0.00803837	0.0385343
R PSL	-0.0172289	-0.0772989	-2.59251	0.00955853	0.0439988
R PeEc	-0.0112766	-0.0410069	-1.37532	0.1691	0.34834
R Pir	-0.0161264	-0.0508969	-1.70702	0.0878874	0.222699
R PoI1	-0.02591	-0.0879437	-2.94953	0.00319896	0.0188377
R PoI2	-0.00423811	-0.0128867	-0.432205	0.665613	0.809398
R PreS	0.00576339	0.0222125	0.744981	0.456322	0.653202
R ProS	-0.00542756	-0.0202337	-0.678613	0.497418	0.686983
R RI	-0.00478024	-0.0251996	-0.845164	0.398064	0.602207
R RSC	-0.000988991	-0.00387589	-0.129993	0.896578	0.947918
R SCEF	-0.00423881	-0.018467	-0.61936	0.53571	0.716574
R SFL	-0.00811452	-0.0333194	-1.11749	0.263843	0.466372
R STGa	-0.00758813	-0.0216009	-0.724469	0.468815	0.663445
R STSda	-0.0126812	-0.0547163	-1.83512	0.0665539	0.183178
R STSdp	-0.010195	-0.0579934	-1.94503	0.0518336	0.153021
R STSva	-0.00672726	-0.0353727	-1.18636	0.235543	0.433742
R STSvp	-0.0177743	-0.078912	-2.64661	0.00815851	0.0389878
R STV	-0.0240929	-0.119493	-4.00764	6.23163e-05	0.000796669
R TA2	-0.00625091	-0.0238842	-0.801048	0.423146	0.624388
R TE1a	-0.0197138	-0.0798559	-2.67827	0.00742716	0.0362664
R TE1m	-0.0195006	-0.0799541	-2.68156	0.00735459	0.0359969
R TE1p	-0.017217	-0.0837303	-2.80821	0.00500318	0.0266962
R TE2a	1.5451e-05	7.8102e-05	0.00261945	0.99791	0.99897
R TE2p	-0.00561206	-0.0274214	-0.919681	0.357789	0.564786
R TF	-0.00495579	-0.0249498	-0.836787	0.402757	0.606365
R TGd	-0.0036852	-0.015958	-0.535211	0.59253	0.759105
R TGv	-0.00904054	-0.0347399	-1.16513	0.244027	0.443796
R TPOJ1	-0.00848756	-0.052162	-1.74945	0.080281	0.208937
R TPOJ2	-0.0158053	-0.082411	-2.76396	0.00573355	0.0296987
R TPOJ3	-0.0103762	-0.054826	-1.8388	0.066011	0.182125
R V1	-0.00386693	-0.0345573	-1.15901	0.246514	0.446649
R V2	-0.00414561	-0.0359458	-1.20558	0.228044	0.424481
R V3A	-0.0107878	-0.053172	-1.78332	0.0746007	0.198541
R V3B	-0.00987502	-0.0574132	-1.92557	0.0542212	0.158108
R V3CD	-0.0105305	-0.054766	-1.83678	0.0663075	0.182736
R V3	-0.00248752	-0.0191338	-0.641726	0.521084	0.705381
R V4	-0.00664955	-0.048682	-1.63273	0.102595	0.248015
R V4t	-0.00259743	-0.00909044	-0.304882	0.76047	0.869895
R V6A	-0.00520884	-0.0202279	-0.678418	0.497541	0.687068
R V6	-0.0158429	-0.0921253	-3.08977	0.00201531	0.0131184
R V7	-0.0125293	-0.0554063	-1.85826	0.0631973	0.176456
R V8	-0.00963524	-0.0460348	-1.54395	0.122671	0.280525
R VIP	-0.0058342	-0.023105	-0.774915	0.438431	0.637998
R VMV1	-0.0222956	-0.0760959	-2.55216	0.0107383	0.0480424
R VMV2	-0.00874255	-0.0385543	-1.29306	0.196055	0.384449
R VMV3	-0.0066781	-0.0337829	-1.13304	0.257259	0.459089
R VVC	-0.00627018	-0.0314412	-1.0545	0.291712	0.497446
R a10p	-0.0100924	-0.0497917	-1.66995	0.094998	0.235234
R a24	-0.00736044	-0.0282607	-0.94783	0.343267	0.550697
R a24pr	-0.0176875	-0.0604667	-2.02798	0.042621	0.133012
R a32pr	-0.011239	-0.0518293	-1.73829	0.0822276	0.212381
R a47r	-0.0226777	-0.127528	-4.27712	1.93241e-05	0.000307894
R a9-46v	-0.00661632	-0.0326051	-1.09354	0.274217	0.478105
R d23ab	-0.0181201	-0.0691929	-2.32064	0.0203504	0.0775793
R d32	-0.00620491	-0.0277277	-0.929954	0.352445	0.559503
R i6-8	-0.0134077	-0.0623427	-2.0909	0.0365929	0.119174
R p10p	-0.0114388	-0.0664681	-2.22926	0.0258458	0.0925877
R p24	-0.0132431	-0.0461459	-1.54768	0.121771	0.279155
R p24pr	-0.0117892	-0.0508234	-1.70456	0.0883463	0.223544
R p32	-0.0183334	-0.0753943	-2.52863	0.0114846	0.0505128
R p32pr	-0.0101481	-0.0492179	-1.65071	0.098868	0.241756
R p47r	-0.0165625	-0.0762034	-2.55577	0.0106278	0.0477028
R p9-46v	-0.0147581	-0.0867423	-2.90923	0.00364088	0.0208601
R pOFC	-0.00800662	-0.0340883	-1.14328	0.252983	0.454195
R s32	-0.0159976	-0.0444472	-1.4907	0.136109	0.301188
R s6-8	-0.0173225	-0.079519	-2.66697	0.00768118	0.0372359
R v23ab	-0.0233526	-0.0903238	-3.02935	0.00246469	0.0153692

## Sheet: Table S7
Table S9: Results of linear regression models comparing cortical volume in regions defined by the HCP-MMP parcellation between all OCD cases and controls
Region	Beta	Cohen's D	T-statistic	P-value	P-value (FDR)
L 10d	-18.4965	-0.0640921	-2.14957	0.0316421	0.107262
L 10pp	-14.6791	-0.0886544	-2.97336	0.00296115	0.0177373
L 10r	-13.3672	-0.075478	-2.53144	0.0113932	0.0501969
L 10v	-23.3584	-0.102232	-3.42874	0.000611828	0.00507525
L 11l	-19.0489	-0.0774616	-2.59797	0.00940822	0.0434739
L 13l	-17.8086	-0.0808233	-2.71072	0.00673921	0.0335832
L 1	-37.4653	-0.0857052	-2.87445	0.00406626	0.0227245
L 23c	-2.50841	-0.0154557	-0.518364	0.60423	0.767336
L 23d	-12.8185	-0.098058	-3.28874	0.00101407	0.00760459
L 24dd	-18.0461	-0.0844087	-2.83096	0.00466133	0.025276
L 24dv	-4.3904	-0.0288626	-0.968016	0.333088	0.540198
L 25	-5.03444	-0.049985	-1.67644	0.093722	0.23292
L 2	-36.7149	-0.0822466	-2.75845	0.005831	0.0300951
L 31a	2.02453	0.0131889	0.44234	0.658264	0.804368
L 31pd	2.8346	0.0167307	0.561128	0.574738	0.745821
L 31pv	-3.74944	-0.0277455	-0.930551	0.352135	0.55916
L 33pr	-4.36636	-0.0449225	-1.50665	0.131972	0.294941
L 3a	-0.904451	-0.00723119	-0.242525	0.808384	0.898859
L 3b	-17.0597	-0.0550093	-1.84494	0.0651112	0.180364
L 43	-3.18295	-0.019675	-0.659875	0.509368	0.696292
L 44	-21.7832	-0.0910998	-3.05537	0.00226093	0.0143669
L 45	-33.6787	-0.10167	-3.4099	0.000655566	0.00536124
L 46	-8.59908	-0.0184268	-0.618014	0.536598	0.717214
L 47l	-9.11825	-0.0455561	-1.5279	0.126608	0.286631
L 47m	-6.28817	-0.0755979	-2.53546	0.0112634	0.0497723
L 47s	-11.2295	-0.0583131	-1.95575	0.0505562	0.15033
L 4	-36.8365	-0.0687515	-2.30584	0.0211645	0.0798922
L 52	-3.54773	-0.0666566	-2.23558	0.0254279	0.0914934
L 55b	-10.1595	-0.0403878	-1.35456	0.175626	0.357237
L 5L	1.14451	0.00719094	0.241176	0.80943	0.89948
L 5m	2.30735	0.0231098	0.775073	0.438337	0.637889
L 5mv	-2.23036	-0.0210556	-0.706178	0.480114	0.672981
L 6a	-21.7363	-0.061703	-2.06944	0.0385614	0.123729
L 6d	-13.717	-0.0504889	-1.69334	0.0904607	0.227197
L 6ma	-30.8393	-0.0838011	-2.81059	0.00496644	0.0265363
L 6mp	-8.8851	-0.0316698	-1.06217	0.288217	0.493696
L 6r	-21.2947	-0.0715921	-2.40111	0.0163856	0.0659953
L 6v	-12.7476	-0.0741187	-2.48585	0.0129601	0.0553365
L 7AL	-7.52682	-0.0264732	-0.887879	0.374653	0.580534
L 7Am	-0.787136	-0.00285356	-0.0957049	0.923759	0.96203
L 7PC	-17.6252	-0.0496301	-1.66453	0.0960755	0.236983
L 7PL	-6.95826	-0.0431231	-1.4463	0.148164	0.318904
L 7Pm	1.77076	0.01136	0.381	0.703221	0.834254
L 7m	-11.6279	-0.0611529	-2.05099	0.0403251	0.127765
L 8Ad	-8.73879	-0.0256474	-0.860183	0.389734	0.594572
L 8Av	-22.5896	-0.0520209	-1.74472	0.081102	0.21047
L 8BL	-13.3289	-0.0592747	-1.988	0.0468718	0.142388
L 8BM	-25.3351	-0.124951	-4.19069	2.83428e-05	0.000421588
L 8C	-19.4585	-0.0481391	-1.61453	0.106483	0.254536
L 9-46d	12.5815	0.0262704	0.881079	0.378322	0.584118
L 9a	-14.6059	-0.0424935	-1.42518	0.154175	0.327442
L 9m	-26.2964	-0.0744251	-2.49613	0.0125911	0.0541887
L 9p	-7.37642	-0.0253881	-0.851486	0.394545	0.599115
L A1	-10.4157	-0.117624	-3.94496	8.1024e-05	0.000985726
L A4	-12.3398	-0.0439196	-1.47301	0.140819	0.308342
L A5	-15.4494	-0.0603454	-2.02391	0.043038	0.134012
L AAIC	-13.3454	-0.0940948	-3.15583	0.00161098	0.0109811
L AIP	-8.16354	-0.0210818	-0.707059	0.479566	0.672437
L AVI	-10.0089	-0.101655	-3.40939	0.000656796	0.00537003
L DVT	-11.7153	-0.0621263	-2.08364	0.0372489	0.120746
L EC	-4.46189	-0.020283	-0.680268	0.496369	0.686124
L FEF	-10.4925	-0.0486368	-1.63122	0.102914	0.24855
L FFC	0.843843	0.00212058	0.0711217	0.943304	0.971706
L FOP1	-8.24028	-0.0899964	-3.01837	0.0025556	0.0158137
L FOP2	-4.87707	-0.0788375	-2.64411	0.00821888	0.0392112
L FOP3	-5.61638	-0.10151	-3.40453	0.000668567	0.00544562
L FOP4	-24.0001	-0.139136	-4.66644	3.15335e-06	7.00615e-05
L FOP5	-9.76183	-0.0988219	-3.31437	0.000925758	0.00707488
L FST	-0.702327	-0.00288265	-0.0966805	0.922984	0.961615
L H	0.0967423	0.00275088	0.0922611	0.926495	0.963406
L IFJa	-10.051	-0.0576898	-1.93485	0.0530717	0.155703
L IFJp	-1.3506	-0.0096327	-0.323069	0.746658	0.862006
L IFSa	-30.5388	-0.0937943	-3.14575	0.00166741	0.0112846
L IFSp	-17.6444	-0.0770017	-2.58254	0.00983874	0.0449623
L IP0	-6.526	-0.0433124	-1.45265	0.146392	0.316385
L IP1	-28.8874	-0.100548	-3.37225	0.000751845	0.00598161
L IP2	-3.14413	-0.0151346	-0.507597	0.611761	0.772845
L IPS1	-5.12128	-0.0309412	-1.03773	0.299451	0.505463
L Ig	-4.62615	-0.0662255	-2.22112	0.026392	0.0939824
L LBelt	-4.75593	-0.0605686	-2.0314	0.0422733	0.132252
L LIPd	-10.6064	-0.0622559	-2.08799	0.0368549	0.119804
L LIPv	-8.24229	-0.0381164	-1.27838	0.201182	0.39097
L LO1	0.438444	0.00343542	0.11522	0.908276	0.953725
L LO2	-4.31473	-0.0276443	-0.927155	0.353896	0.561007
L LO3	-13.6475	-0.0762245	-2.55648	0.0106063	0.0476347
L MBelt	-12.3272	-0.106216	-3.56236	0.000371327	0.00338903
L MIP	2.28992	0.0123079	0.412793	0.679778	0.818786
L MI	-6.56118	-0.0409379	-1.37301	0.169819	0.349303
L MST	-2.67977	-0.0211567	-0.70957	0.478007	0.671092
L MT	-8.21553	-0.0648026	-2.1734	0.0298021	0.10264
L OFC	-12.7766	-0.0512083	-1.71746	0.0859634	0.219227
L OP1	-6.87335	-0.048979	-1.6427	0.100515	0.24455
L OP2-3	-6.1259	-0.0783452	-2.6276	0.00862798	0.0406981
L OP4	-4.17937	-0.0223792	-0.75057	0.452951	0.650286
L PBelt	-6.74618	-0.0450391	-1.51056	0.130971	0.293366
L PCV	18.877	0.0755732	2.53463	0.01129	0.0498604
L PEF	-2.44733	-0.0177702	-0.59599	0.551212	0.728581
L PF	-30.9342	-0.0482738	-1.61905	0.105507	0.252901
L PFcm	-13.0402	-0.0831922	-2.79016	0.00529025	0.0278898
L PFm	-69.1884	-0.0869005	-2.91454	0.0035797	0.0206006
L PFop	-19.4161	-0.0757858	-2.54176	0.0110626	0.0491177
L PFt	-14.9773	-0.0487459	-1.63488	0.102144	0.247262
L PGi	-39.4858	-0.0842317	-2.82503	0.00474838	0.0256363
L PGp	-20.5385	-0.0620969	-2.08265	0.0373389	0.120963
L PGs	-43.2242	-0.0894014	-2.99841	0.00272868	0.0166365
L PHA1	-0.0748412	-0.000483642	-0.0162208	0.987059	0.993906
L PHA2	2.18295	0.0362134	1.21455	0.2246	0.420339
L PHA3	-4.02393	-0.023537	-0.789402	0.429919	0.630445
L PHT	-29.6815	-0.06453	-2.16426	0.030497	0.10434
L PH	-25.1766	-0.068126	-2.28486	0.0223671	0.0832476
L PIT	-1.38239	-0.00712578	-0.23899	0.811124	0.90047
L PI	-4.25043	-0.0478894	-1.60615	0.10831	0.257531
L POS1	-27.875	-0.147806	-4.95723	7.41267e-07	2.20114e-05
L POS2	-9.28113	-0.0353517	-1.18565	0.235822	0.434061
L PSL	-14.6971	-0.0525601	-1.7628	0.0780019	0.204767
L PeEc	-17.7542	-0.0251989	-0.845139	0.398078	0.602218
L Pir	-7.6303	-0.0768748	-2.57829	0.00996054	0.0453975
L PoI1	-6.97802	-0.0593254	-1.9897	0.0466842	0.142021
L PoI2	-21.8866	-0.110368	-3.7016	0.000216801	0.0021913
L PreS	0.389398	0.00385085	0.129153	0.897242	0.948237
L ProS	-9.80704	-0.0813292	-2.72768	0.00640278	0.0323122
L RI	-6.21208	-0.0643245	-2.15736	0.0310299	0.105683
L RSC	-14.3128	-0.0905988	-3.03857	0.00239061	0.0150207
L SCEF	-30.2341	-0.112725	-3.78067	0.000158428	0.00169621
L SFL	-25.975	-0.091274	-3.06122	0.00221735	0.0141495
L STGa	-7.14859	-0.0353241	-1.18473	0.236188	0.434533
L STSda	-17.2197	-0.0684983	-2.29735	0.0216445	0.081277
L STSdp	-10.7918	-0.0487011	-1.63338	0.10246	0.247765
L STSva	-13.2609	-0.0648682	-2.1756	0.029637	0.102235
L STSvp	-3.88388	-0.0155162	-0.520393	0.602815	0.766256
L STV	-16.5939	-0.0632605	-2.12168	0.0339191	0.112759
L TA2	-5.27986	-0.0428015	-1.43551	0.151211	0.323265
L TE1a	-27.4269	-0.0656387	-2.20144	0.0277553	0.0975722
L TE1m	-13.7961	-0.0394451	-1.32294	0.185922	0.371107
L TE1p	-55.9311	-0.0948858	-3.18235	0.00147075	0.0102063
L TE2a	-24.1983	-0.0420118	-1.40902	0.158897	0.333936
L TE2p	-15.975	-0.0473027	-1.58647	0.112702	0.264693
L TF	-18.7745	-0.0465544	-1.56138	0.118505	0.273818
L TGd	-59.036	-0.0874153	-2.9318	0.00338695	0.0197036
L TGv	-34.902	-0.087318	-2.92854	0.00342264	0.0198737
L TPOJ1	-6.73781	-0.0277467	-0.930591	0.352115	0.559135
L TPOJ2	-16.1505	-0.0499547	-1.67542	0.0939212	0.233282
L TPOJ3	-9.52343	-0.0544626	-1.82661	0.0678245	0.185694
L V1	-29.2019	-0.0356315	-1.19504	0.232135	0.429313
L V2	-17.6367	-0.0271221	-0.909641	0.363061	0.569647
L V3A	-4.23354	-0.0205548	-0.689381	0.490619	0.681608
L V3B	-1.76122	-0.0210205	-0.705	0.480846	0.673669
L V3CD	-5.68231	-0.0309696	-1.03868	0.299007	0.50503
L V3	-3.53569	-0.00651749	-0.218589	0.82698	0.909388
L V4	-10.6729	-0.0248014	-0.831808	0.405561	0.608929
L V4t	-4.82929	-0.0346118	-1.16084	0.24577	0.445807
L V6A	-3.47447	-0.0287638	-0.964704	0.334745	0.541887
L V6	-10.0058	-0.0671231	-2.25123	0.0244192	0.0887821
L V7	-3.59576	-0.033604	-1.12704	0.259787	0.461899
L V8	-4.50141	-0.0325871	-1.09293	0.274482	0.478437
L VIP	7.0339	0.0285729	0.958299	0.337964	0.545204
L VMV1	3.60096	0.0276155	0.926189	0.354397	0.561488
L VMV2	4.79216	0.0447711	1.50157	0.133279	0.297005
L VMV3	-3.84898	-0.0281811	-0.945159	0.344629	0.551961
L VVC	-8.58024	-0.0400046	-1.3417	0.179759	0.36288
L a10p	-13.0346	-0.0733789	-2.46104	0.0138907	0.0583098
L a24	-17.0507	-0.0810873	-2.71957	0.00656176	0.0329154
L a24pr	1.6506	0.00979114	0.328383	0.742638	0.859475
L a32pr	-19.1115	-0.0852463	-2.85906	0.0042685	0.0235918
L a47r	-11.3102	-0.0351661	-1.17943	0.23829	0.437009
L a9-46v	-6.62571	-0.0203755	-0.68337	0.494408	0.684563
L d23ab	-12.0342	-0.0815222	-2.73416	0.00627846	0.0318228
L d32	-34.7136	-0.123586	-4.14493	3.46158e-05	0.000496018
L i6-8	-6.77608	-0.0286852	-0.962067	0.336067	0.543212
L p10p	-1.22665	-0.0056108	-0.188179	0.850745	0.922572
L p24	6.58787	0.0303564	1.01812	0.308677	0.51525
L p24pr	-7.586	-0.0570581	-1.91366	0.055727	0.16115
L p32	-5.41182	-0.0345749	-1.1596	0.246273	0.446395
L p32pr	-21.0859	-0.0937757	-3.14512	0.00167096	0.0113043
L p47r	-21.187	-0.0827011	-2.77369	0.00556516	0.0289989
L p9-46v	-13.0094	-0.0416194	-1.39586	0.162824	0.339477
L pOFC	-14.391	-0.0827195	-2.77431	0.00555461	0.0289561
L s32	-5.38488	-0.0566698	-1.90064	0.0574133	0.164642
L s6-8	-0.237412	-0.00112605	-0.0377663	0.969876	0.985144
L v23ab	-13.2281	-0.112698	-3.77976	0.000159008	0.00170126
R 10d	-15.5322	-0.0686909	-2.30381	0.0212787	0.0802282
R 10pp	-12.2437	-0.0524381	-1.75871	0.0786945	0.206107
R 10r	-11.673	-0.0803974	-2.69643	0.00703473	0.0347306
R 10v	-9.46101	-0.0448154	-1.50305	0.132895	0.29645
R 11l	-15.1234	-0.053172	-1.78332	0.0746006	0.198541
R 13l	-10.4676	-0.0717729	-2.40718	0.0161163	0.0651479
R 1	-11.1433	-0.02486	-0.833774	0.404452	0.607846
R 23c	-7.14999	-0.0420931	-1.41175	0.158092	0.332833
R 23d	-16.9587	-0.113448	-3.80489	0.000143743	0.00156718
R 24dd	-9.14605	-0.0388272	-1.30222	0.192909	0.380294
R 24dv	-11.4677	-0.0569186	-1.90898	0.0563279	0.162369
R 25	-2.86116	-0.0306032	-1.02639	0.304761	0.511057
R 2	-12.5913	-0.0259528	-0.870425	0.384114	0.589364
R 31a	-2.98534	-0.0191107	-0.640949	0.521588	0.705787
R 31pd	-3.93413	-0.0284436	-0.953964	0.340153	0.547378
R 31pv	-0.879905	-0.00663821	-0.222637	0.823828	0.907657
R 33pr	-8.27657	-0.06676	-2.23905	0.0252013	0.0909111
R 3a	1.08388	0.00924294	0.309997	0.756578	0.867762
R 3b	6.3227	0.0247625	0.830506	0.406297	0.609594
R 43	-17.8249	-0.0913949	-3.06527	0.00218758	0.0139999
R 44	-28.5116	-0.111235	-3.73068	0.000193313	0.001996
R 45	-17.3248	-0.0736512	-2.47017	0.0135415	0.0572134
R 46	-10.914	-0.0203358	-0.682038	0.49525	0.685261
R 47l	-11.2669	-0.0533819	-1.79036	0.0734626	0.196375
R 47m	-10.12	-0.100856	-3.38259	0.000724159	0.0058039
R 47s	-20.4032	-0.0937097	-3.14291	0.00168362	0.0113689
R 4	-7.92062	-0.0141596	-0.474895	0.634884	0.788643
R 52	-1.66636	-0.0466402	-1.56425	0.117828	0.272773
R 55b	-10.1588	-0.0515483	-1.72887	0.0839014	0.215466
R 5L	-1.92634	-0.0105581	-0.354106	0.723276	0.847465
R 5m	-3.70653	-0.0264605	-0.887453	0.374882	0.580764
R 5mv	-4.60252	-0.0310258	-1.04057	0.298132	0.504115
R 6a	9.79384	0.0292041	0.979471	0.3274	0.534444
R 6d	5.25524	0.0188031	0.630632	0.528313	0.711072
R 6ma	-13.5465	-0.0361313	-1.2118	0.225652	0.421617
R 6mp	-18.5734	-0.0552417	-1.85274	0.0639852	0.178097
R 6r	-52.4041	-0.138956	-4.6604	3.24687e-06	7.17974e-05
R 6v	-21.4259	-0.0846942	-2.84054	0.00452391	0.0246822
R 7AL	-3.18831	-0.0140308	-0.470576	0.637966	0.790824
R 7Am	-12.0543	-0.0486332	-1.6311	0.10294	0.248591
R 7PC	-30.5217	-0.0851334	-2.85527	0.00431965	0.0238209
R 7PL	-4.30985	-0.026058	-0.873954	0.38219	0.587713
R 7Pm	-3.31098	-0.0210527	-0.706082	0.480174	0.673016
R 7m	-6.46503	-0.0327072	-1.09696	0.272718	0.476455
R 8Ad	11.0764	0.0285769	0.958434	0.337895	0.545117
R 8Av	-24.1838	-0.0510428	-1.71191	0.0869815	0.220978
R 8BL	-7.01274	-0.0198047	-0.664224	0.506581	0.694116
R 8BM	-24.0886	-0.0988163	-3.31418	0.00092638	0.0070787
R 8C	-17.664	-0.0470816	-1.57906	0.114392	0.267381
R 9-46d	17.9858	0.0343534	1.15217	0.249312	0.449953
R 9a	-5.52863	-0.0230145	-0.771877	0.440228	0.639546
R 9m	-38.5372	-0.0957288	-3.21063	0.00133375	0.00944672
R 9p	-3.90211	-0.013796	-0.4627	0.643602	0.794924
R A1	-4.05298	-0.0675452	-2.26538	0.0235363	0.0863991
R A4	-5.96263	-0.0258164	-0.865849	0.386619	0.59173
R A5	-19.224	-0.0684084	-2.29434	0.0218169	0.0817222
R AAIC	-11.3474	-0.0740317	-2.48293	0.0130667	0.0556883
R AIP	-14.3877	-0.0380489	-1.27612	0.20198	0.391983
R AVI	-13.8187	-0.119167	-3.99673	6.52497e-05	0.000827548
R DVT	-9.59668	-0.0481065	-1.61343	0.106721	0.254902
R EC	-4.47669	-0.0252188	-0.845807	0.397705	0.601951
R FEF	5.48339	0.0230766	0.77396	0.438995	0.638524
R FFC	-32.0514	-0.0728841	-2.44444	0.0145456	0.060289
R FOP1	-8.77839	-0.0881535	-2.95656	0.00312703	0.0185143
R FOP2	-3.79024	-0.0708318	-2.37561	0.0175614	0.0695137
R FOP3	-2.84251	-0.0688875	-2.3104	0.0209107	0.0791814
R FOP4	-9.63786	-0.0808362	-2.71115	0.00673048	0.033554
R FOP5	-11.8421	-0.110267	-3.69824	0.000219683	0.00221395
R FST	-1.42036	-0.00642109	-0.215355	0.8295	0.910731
R H	0.848041	0.0205797	0.690219	0.490092	0.681184
R IFJa	-13.6062	-0.0769246	-2.57996	0.00991259	0.0452308
R IFJp	-8.10991	-0.0877828	-2.94413	0.00325519	0.0190942
R IFSa	-24.2374	-0.0737601	-2.47382	0.0134041	0.0567797
R IFSp	-20.0926	-0.0717521	-2.40648	0.0161472	0.0652406
R IP0	-10.7067	-0.0674793	-2.26317	0.0236723	0.0867897
R IP1	-24.8586	-0.0817325	-2.74121	0.00614549	0.031308
R IP2	-21.7128	-0.083491	-2.80018	0.00512906	0.0272189
R IPS1	-2.86328	-0.0163827	-0.549456	0.58272	0.751779
R Ig	-7.99475	-0.12133	-4.06925	4.7971e-05	0.000646019
R LBelt	-4.90278	-0.0617483	-2.07096	0.038419	0.123409
R LIPd	-5.36522	-0.0448476	-1.50413	0.132617	0.296035
R LIPv	-5.8562	-0.0318067	-1.06676	0.286138	0.491421
R LO1	-3.80158	-0.0372491	-1.24929	0.211624	0.404138
R LO2	-4.55849	-0.0380018	-1.27453	0.20254	0.392725
R LO3	-7.03605	-0.0438634	-1.47113	0.141327	0.309071
R MBelt	-6.12355	-0.077939	-2.61398	0.0089792	0.0419511
R MIP	-9.21895	-0.0353794	-1.18658	0.235455	0.433597
R MI	-11.3791	-0.0812026	-2.72344	0.00648552	0.0326374
R MST	5.84654	0.0308725	1.03543	0.300525	0.506608
R MT	-5.01486	-0.0289048	-0.969433	0.332381	0.53952
R OFC	-23.9557	-0.0915204	-3.06948	0.00215704	0.0138394
R OP1	-4.8816	-0.0500219	-1.67767	0.0934802	0.23252
R OP2-3	-5.59176	-0.0903485	-3.03018	0.00245795	0.01534
R OP4	-16.7823	-0.0811045	-2.72015	0.00655032	0.0328705
R PBelt	-9.43225	-0.0794492	-2.66463	0.00773471	0.0374344
R PCV	0.704321	0.00300247	0.100699	0.919794	0.959989
R PEF	-3.50844	-0.0186536	-0.625619	0.531597	0.713471
R PF	-30.9478	-0.0733225	-2.45915	0.013964	0.0585121
R PFcm	-14.3068	-0.101011	-3.38779	0.000710612	0.00571789
R PFm	-65.2989	-0.0865753	-2.90363	0.00370653	0.0211489
R PFop	-13.8481	-0.0594756	-1.99474	0.0461313	0.140763
R PFt	-20.9763	-0.0839206	-2.81459	0.00490506	0.0262804
R PGi	-39.1637	-0.0521327	-1.74847	0.0804514	0.209266
R PGp	-31.8115	-0.0743713	-2.49432	0.0126553	0.0543865
R PGs	-42.5878	-0.0937951	-3.14577	0.00166726	0.0112841
R PHA1	1.85129	0.0134559	0.451293	0.6518	0.800164
R PHA2	-0.455588	-0.00713902	-0.239434	0.81078	0.900277
R PHA3	1.19179	0.0144781	0.485576	0.627291	0.783576
R PHT	-31.8597	-0.07425	-2.49026	0.0128008	0.054837
R PH	-21.1082	-0.0560375	-1.87943	0.0602504	0.170538
R PIT	-3.97038	-0.0197161	-0.661254	0.508483	0.695716
R PI	-5.50011	-0.0589598	-1.97744	0.0480528	0.144963
R POS1	-19.2364	-0.0967883	-3.24616	0.00117827	0.00856819
R POS2	-9.17539	-0.0331697	-1.11247	0.265995	0.46882
R PSL	-25.4521	-0.1036	-3.47463	0.000516367	0.00441756
R PeEc	-10.3927	-0.0199346	-0.668584	0.503795	0.692057
R Pir	-11.281	-0.0779643	-2.61483	0.00895693	0.0418686
R PoI1	-13.8135	-0.119148	-3.99609	6.5423e-05	0.000829442
R PoI2	-18.1389	-0.0902348	-3.02636	0.00248911	0.0154852
R PreS	1.91774	0.0206841	0.693718	0.487895	0.679284
R ProS	-10.316	-0.101232	-3.39521	0.000691668	0.00559811
R RI	-3.98758	-0.0489186	-1.64067	0.100935	0.24526
R RSC	-7.73905	-0.0454691	-1.52498	0.127334	0.28773
R SCEF	-15.5968	-0.0737569	-2.47372	0.0134081	0.0567954
R SFL	-13.2945	-0.0652186	-2.18735	0.0287679	0.100076
R STGa	-0.977861	-0.00496386	-0.166482	0.867785	0.931821
R STSda	-19.6034	-0.0654227	-2.1942	0.0282719	0.0988545
R STSdp	-9.65418	-0.0513908	-1.72358	0.0848515	0.217236
R STSva	-1.42801	-0.00767631	-0.257454	0.79684	0.891895
R STSvp	-19.0022	-0.0835145	-2.80097	0.00511657	0.0271693
R STV	-31.403	-0.115792	-3.88354	0.000104421	0.00120916
R TA2	-6.4248	-0.0430324	-1.44325	0.149018	0.320129
R TE1a	-13.7259	-0.0375474	-1.25929	0.20799	0.399659
R TE1m	-14.4696	-0.0490375	-1.64466	0.10011	0.243898
R TE1p	-48.7127	-0.0925361	-3.10355	0.00192398	0.0126417
R TE2a	-4.64016	-0.00826346	-0.277146	0.78168	0.883039
R TE2p	-2.80404	-0.00848795	-0.284675	0.775906	0.879407
R TF	-18.3411	-0.0481351	-1.61439	0.106512	0.254591
R TGd	-51.6303	-0.0796897	-2.6727	0.00755152	0.036756
R TGv	-22.8535	-0.0562455	-1.8864	0.0593045	0.168583
R TPOJ1	-24.3099	-0.063939	-2.14444	0.0320511	0.108266
R TPOJ2	-11.3739	-0.0389312	-1.30571	0.191719	0.378701
R TPOJ3	-6.21488	-0.0260558	-0.87388	0.38223	0.58773
R V1	-59.047	-0.0644664	-2.16212	0.0306611	0.10475
R V2	-21.3038	-0.0316971	-1.06308	0.287801	0.493241
R V3A	-5.56593	-0.0216956	-0.727645	0.466868	0.661748
R V3B	-1.74878	-0.0193175	-0.647884	0.517093	0.702271
R V3CD	-7.43421	-0.0417914	-1.40163	0.161094	0.337027
R V3	-0.281858	-0.000497683	-0.0166917	0.986683	0.993686
R V4	-10.5136	-0.0273747	-0.918114	0.358608	0.56552
R V4t	-0.0709779	-0.000546655	-0.0183341	0.985373	0.99299
R V6A	1.76608	0.0151711	0.508821	0.610902	0.772195
R V6	-3.85932	-0.0241154	-0.8088	0.418673	0.620357
R V7	-1.41056	-0.0116499	-0.390722	0.696021	0.829522
R V8	-4.12836	-0.02764	-0.927013	0.35397	0.561083
R VIP	-2.77615	-0.015446	-0.518041	0.604455	0.76747
R VMV1	-9.17325	-0.0613435	-2.05739	0.0397063	0.126364
R VMV2	-0.487066	-0.00401093	-0.134522	0.892996	0.946038
R VMV3	-4.71139	-0.0378037	-1.26789	0.204903	0.395727
R VVC	-9.13944	-0.0400476	-1.34315	0.179291	0.362261
R a10p	-4.58665	-0.02449	-0.821363	0.411483	0.614162
R a24	-12.3363	-0.0653449	-2.19159	0.0284601	0.0993334
R a24pr	-10.2234	-0.0642695	-2.15552	0.0311738	0.106067
R a32pr	-16.5303	-0.090305	-3.02872	0.00246982	0.0153923
R a47r	-15.6086	-0.04376	-1.46766	0.142267	0.31044
R a9-46v	2.15137	0.00762557	0.255752	0.798154	0.892671
R d23ab	-6.24825	-0.0617057	-2.06953	0.0385529	0.123708
R d32	-16.5276	-0.0574901	-1.92815	0.0538996	0.157495
R i6-8	-7.08168	-0.0306565	-1.02818	0.30392	0.510174
R p10p	-7.2254	-0.0310394	-1.04102	0.29792	0.503861
R p24	-14.7853	-0.0701845	-2.3539	0.0186201	0.0726425
R p24pr	-11.7968	-0.0714342	-2.39582	0.0166239	0.0667107
R p32	-21.663	-0.0996827	-3.34324	0.000834819	0.00650379
R p32pr	-9.29226	-0.0446087	-1.49612	0.134692	0.299038
R p47r	-11.7432	-0.0526176	-1.76473	0.077677	0.204195
R p9-46v	-20.4353	-0.0448973	-1.5058	0.132188	0.295311
R pOFC	-12.8125	-0.0736813	-2.47118	0.0135035	0.0570957
R s32	-10.8859	-0.0959189	-3.217	0.00130452	0.00928008
R s6-8	-16.4123	-0.06319	-2.11931	0.0341183	0.113247
R v23ab	-13.5993	-0.113539	-3.80797	0.00014197	0.00155138

## Sheet: Table S8
Table S10: Results of linear regression models comparing cortical folding index in regions defined by the HCP-MMP parcellation between all OCD cases and controls
Region	Beta	Cohen's D	T-statistic	P-value	P-value (FDR)
L 10d	-0.0610214	-0.0190216	-0.63796	0.523532	0.707286
L 10pp	-0.0346644	-0.0162602	-0.545347	0.585542	0.753824
L 10r	-0.144375	-0.047845	-1.60466	0.108638	0.258084
L 10v	-0.201911	-0.0639142	-2.1436	0.032118	0.108424
L 11l	-0.273179	-0.0899583	-3.01709	0.00256636	0.0158667
L 13l	0.107162	0.0389982	1.30795	0.190956	0.377705
L 1	-0.214048	-0.048032	-1.61094	0.107264	0.255821
L 23c	-0.0742563	-0.043002	-1.44223	0.149306	0.320517
L 23d	-0.105826	-0.0757658	-2.54109	0.0110839	0.0491905
L 24dd	-0.020187	-0.0133456	-0.447596	0.654466	0.801746
L 24dv	0.0526321	0.0414711	1.39089	0.164328	0.341634
L 25	-0.150124	-0.0457376	-1.53398	0.125104	0.284413
L 2	-0.273704	-0.070739	-2.3725	0.0177098	0.0699345
L 31a	-0.0382897	-0.0246047	-0.825213	0.409294	0.612233
L 31pd	0.0534772	0.0304054	1.01976	0.307897	0.514455
L 31pv	-0.051799	-0.0395729	-1.32723	0.1845	0.369249
L 33pr	0.0418149	0.0266051	0.892301	0.372279	0.578492
L 3a	0.0075847	0.00359616	0.120611	0.904005	0.951698
L 3b	-0.133345	-0.0389211	-1.30537	0.191834	0.378894
L 43	0.0094172	0.00699198	0.234503	0.814606	0.902392
L 44	-0.0388294	-0.0210113	-0.704694	0.481037	0.673804
L 45	-0.230437	-0.0882823	-2.96088	0.00308359	0.0183111
L 46	-0.0934955	-0.0215366	-0.722312	0.47014	0.664557
L 47l	-0.132524	-0.0731863	-2.45458	0.0141424	0.0590833
L 47m	-0.0491547	-0.0448306	-1.50356	0.132764	0.296244
L 47s	-0.063688	-0.0208389	-0.69891	0.484644	0.676671
L 4	0.233433	0.0478312	1.6042	0.10874	0.258246
L 52	0.00431429	0.00543035	0.182127	0.855491	0.925195
L 55b	-0.0226272	-0.0128289	-0.430266	0.667023	0.810359
L 5L	0.0195928	0.0137662	0.461701	0.644318	0.795384
L 5m	-0.0240098	-0.018895	-0.633714	0.526299	0.70963
L 5mv	-0.00711213	-0.00385389	-0.129255	0.897162	0.94822
L 6a	0.0178907	0.0074669	0.250431	0.802266	0.89529
L 6d	0.0148184	0.00383147	0.128503	0.897757	0.94849
L 6ma	-0.18859	-0.042253	-1.41711	0.156519	0.330719
L 6mp	-0.0018476	-0.000757	-0.0253888	0.979746	0.990364
L 6r	0.0109154	0.00510499	0.171215	0.864062	0.92993
L 6v	0.0149388	0.00890414	0.298634	0.765233	0.873011
L 7AL	0.00904041	0.00356338	0.119511	0.904876	0.952093
L 7Am	0.0448515	0.0178447	0.598489	0.549544	0.727339
L 7PC	-0.105259	-0.0410082	-1.37536	0.169087	0.34833
L 7PL	0.0345937	0.0225217	0.75535	0.450079	0.647899
L 7Pm	0.0211372	0.0134055	0.449603	0.653018	0.800862
L 7m	-0.144964	-0.0720557	-2.41666	0.0157031	0.0639027
L 8Ad	-0.0260342	-0.0101015	-0.338792	0.734782	0.85454
L 8Av	-0.152153	-0.0552801	-1.85403	0.0638006	0.177727
L 8BL	-0.0429685	-0.0245477	-0.823301	0.41038	0.613272
L 8BM	-0.111085	-0.0648495	-2.17497	0.029684	0.102344
L 8C	0.0572506	0.0212536	0.712821	0.475993	0.669419
L 9-46d	0.0375916	0.0093147	0.312404	0.754748	0.866729
L 9a	-0.120358	-0.0392306	-1.31575	0.188326	0.374235
L 9m	-0.12159	-0.043387	-1.45515	0.145698	0.315498
L 9p	-0.0187803	-0.00748641	-0.251085	0.80176	0.89505
L A1	-0.0721959	-0.059839	-2.00693	0.0448169	0.137914
L A4	-0.133369	-0.0581315	-1.94966	0.0512785	0.151837
L A5	-0.157103	-0.0772737	-2.59167	0.00958201	0.0440857
L AAIC	-0.0406264	-0.0287623	-0.964651	0.334771	0.541907
L AIP	-0.0370075	-0.0133835	-0.448867	0.653549	0.801222
L AVI	-0.0257211	-0.0231899	-0.777763	0.43675	0.636379
L DVT	-0.143088	-0.0812202	-2.72403	0.00647395	0.0325944
L EC	0.0902395	0.0290086	0.972912	0.330649	0.537769
L FEF	0.0400511	0.0253582	0.850482	0.395102	0.599576
L FFC	0.0403127	0.0142697	0.478588	0.632255	0.786915
L FOP1	0.00539525	0.00581664	0.195083	0.845337	0.919726
L FOP2	0.00712132	0.0102152	0.342604	0.731912	0.852708
L FOP3	0.00530867	0.00759451	0.254711	0.798958	0.893188
L FOP4	-0.0987452	-0.0656576	-2.20207	0.0277105	0.0974464
L FOP5	-0.0420006	-0.0455647	-1.52818	0.126537	0.286549
L FST	-0.0465344	-0.0224069	-0.751502	0.45239	0.649768
L H	0.243953	0.10919	3.66209	0.00025303	0.00248414
L IFJa	-0.0386518	-0.0290206	-0.973314	0.33045	0.537607
L IFJp	0.0159266	0.0134099	0.449752	0.652911	0.800799
L IFSa	-0.174506	-0.0566658	-1.9005	0.0574308	0.164675
L IFSp	-0.119043	-0.0658011	-2.20689	0.027372	0.0965869
L IP0	-0.057655	-0.0372043	-1.24779	0.212173	0.404846
L IP1	-0.124533	-0.0554884	-1.86101	0.0628071	0.175651
L IP2	0.0661224	0.0342587	1.149	0.250618	0.451451
L IPS1	-0.0241436	-0.0143378	-0.480872	0.630631	0.785941
L Ig	-0.0655021	-0.0704491	-2.36278	0.0181808	0.0713338
L LBelt	-0.0895926	-0.0558567	-1.87337	0.0610823	0.172232
L LIPd	-0.0900048	-0.067681	-2.26994	0.0232584	0.0856832
L LIPv	-0.0396267	-0.0187222	-0.62792	0.530088	0.7124
L LO1	-0.0170921	-0.0129711	-0.435035	0.663558	0.808033
L LO2	-0.0425359	-0.0294605	-0.988069	0.323172	0.530105
L LO3	-0.0428248	-0.0241267	-0.809181	0.418454	0.620191
L MBelt	-0.0178546	-0.0105808	-0.354867	0.722706	0.847113
L MIP	0.0609388	0.0353908	1.18696	0.235304	0.433425
L MI	0.00175841	0.00102863	0.0344988	0.972481	0.986467
L MST	0.0144593	0.0111627	0.374383	0.708137	0.837361
L MT	-0.0300295	-0.0252068	-0.845406	0.397929	0.602092
L OFC	-0.0113722	-0.00262362	-0.0879931	0.929886	0.965187
L OP1	-0.0857298	-0.0473118	-1.58678	0.112633	0.264574
L OP2-3	-0.0717546	-0.0682517	-2.28908	0.0221207	0.082534
L OP4	0.050012	0.0302686	1.01517	0.310078	0.5167
L PBelt	-0.10613	-0.0556191	-1.8654	0.0621907	0.174436
L PCV	0.18287	0.0781746	2.62188	0.00877399	0.0411987
L PEF	-0.0166625	-0.0141772	-0.475486	0.634463	0.788311
L PF	-0.0794473	-0.0170629	-0.57227	0.567167	0.740206
L PFcm	-0.0863675	-0.0560057	-1.87836	0.0603959	0.170877
L PFm	-0.212819	-0.0331526	-1.1119	0.266242	0.469116
L PFop	-0.0972215	-0.0488396	-1.63802	0.101487	0.246168
L PFt	0.0231114	0.00919996	0.308556	0.757674	0.868384
L PGi	-0.0622477	-0.0150951	-0.50627	0.612692	0.773599
L PGp	-0.125866	-0.0456145	-1.52986	0.126123	0.285929
L PGs	-0.0128759	-0.00316231	-0.10606	0.915539	0.957706
L PHA1	0.0714295	0.0419473	1.40686	0.159537	0.334795
L PHA2	0.0481824	0.0457131	1.53316	0.125306	0.284683
L PHA3	0.0479444	0.0228677	0.766955	0.443148	0.641999
L PHT	-0.162584	-0.0462767	-1.55207	0.120717	0.277434
L PH	-0.152819	-0.0493182	-1.65407	0.0981822	0.240594
L PIT	-0.00571323	-0.0039669	-0.133045	0.894164	0.946729
L PI	-0.0125223	-0.0177866	-0.59654	0.550844	0.728313
L POS1	-0.2246	-0.108809	-3.64933	0.000265902	0.00258877
L POS2	-0.011417	-0.00438597	-0.1471	0.88306	0.940419
L PSL	-0.026151	-0.0102738	-0.34457	0.730434	0.851695
L PeEc	0.0800135	0.0169824	0.56957	0.568998	0.741513
L Pir	-0.000533449	-0.00020638	-0.00692173	0.994478	0.997443
L PoI1	0.0308559	0.016846	0.564995	0.572105	0.743799
L PoI2	-0.118431	-0.0414822	-1.39126	0.164215	0.34147
L PreS	0.0131821	0.00519215	0.174138	0.861765	0.928653
L ProS	-0.132996	-0.0703554	-2.35963	0.0183353	0.0718078
L RI	-0.0206533	-0.0151013	-0.506478	0.612546	0.773484
L RSC	0.0420194	0.0188784	0.633159	0.526662	0.709908
L SCEF	-0.101348	-0.0369207	-1.23827	0.215679	0.40924
L SFL	-0.0879505	-0.0433907	-1.45527	0.145664	0.315452
L STGa	-0.0268282	-0.0168557	-0.56532	0.571884	0.743602
L STSda	-0.148609	-0.0722053	-2.42168	0.0154883	0.0632465
L STSdp	-0.0327077	-0.0165144	-0.553872	0.579694	0.749462
L STSva	-0.0676831	-0.0355817	-1.19337	0.232789	0.430186
L STSvp	-0.0131701	-0.00526058	-0.176434	0.859961	0.927681
L STV	-0.0800447	-0.0353613	-1.18597	0.235695	0.43392
L TA2	-0.0154237	-0.0115523	-0.387451	0.698441	0.831197
L TE1a	-0.0670339	-0.0212155	-0.71154	0.476786	0.670033
L TE1m	-0.159809	-0.0654214	-2.19415	0.0282752	0.098862
L TE1p	-0.216493	-0.0525441	-1.76226	0.0780923	0.204934
L TE2a	-0.0911779	-0.0177274	-0.594557	0.55217	0.729329
L TE2p	-0.111545	-0.0347625	-1.16589	0.24372	0.44345
L TF	0.0476968	0.0117173	0.392985	0.694349	0.828488
L TGd	-0.194572	-0.0418251	-1.40276	0.160756	0.336521
L TGv	-0.182942	-0.0574107	-1.92549	0.0542314	0.158132
L TPOJ1	-0.0383671	-0.0165626	-0.555491	0.578586	0.748613
L TPOJ2	-0.0428119	-0.0191337	-0.64172	0.521088	0.705381
L TPOJ3	-0.0983873	-0.0384418	-1.28929	0.197363	0.386235
L V1	-0.157623	-0.0124202	-0.41656	0.67702	0.817033
L V2	-0.229726	-0.0301543	-1.01134	0.311909	0.518539
L V3A	0.0449487	0.0200102	0.671117	0.50218	0.690657
L V3B	-0.00933136	-0.00930264	-0.311999	0.755056	0.866892
L V3CD	-0.0201323	-0.0127168	-0.426505	0.66976	0.811966
L V3	-0.117115	-0.0232649	-0.780276	0.435269	0.635022
L V4	0.00614009	0.00145151	0.0486819	0.961175	0.980742
L V4t	-0.0399063	-0.0327126	-1.09714	0.272639	0.476365
L V6A	-0.037107	-0.0283371	-0.950391	0.341964	0.54929
L V6	-0.0362448	-0.0200968	-0.674021	0.500333	0.68932
L V7	0.018341	0.0166999	0.560093	0.575444	0.74627
L V8	-0.0277086	-0.0206889	-0.693881	0.487792	0.679197
L VIP	0.0680117	0.0334204	1.12088	0.262399	0.464719
L VMV1	0.0654728	0.042523	1.42617	0.153889	0.327048
L VMV2	0.0199998	0.0161453	0.541494	0.588194	0.755874
L VMV3	-0.0890354	-0.0690548	-2.31601	0.0206021	0.0782879
L VVC	-0.0178722	-0.00846858	-0.284026	0.776404	0.879691
L a10p	-0.0334822	-0.015228	-0.510727	0.609567	0.771225
L a24	-0.0634398	-0.0202492	-0.679132	0.497089	0.686694
L a24pr	0.0349831	0.0220351	0.739031	0.459926	0.656091
L a32pr	0.00738703	0.00455354	0.15272	0.878626	0.9378
L a47r	-0.0818077	-0.0232401	-0.779444	0.435759	0.635459
L a9-46v	0.00503455	0.00162599	0.0545337	0.956512	0.978409
L d23ab	-0.0534326	-0.0393779	-1.32069	0.186673	0.372056
L d32	-0.146805	-0.0778651	-2.6115	0.00904444	0.0421952
L i6-8	-0.00210785	-0.00138663	-0.046506	0.962909	0.9816
L p10p	-0.00368164	-0.00146156	-0.0490189	0.960906	0.980589
L p24	0.084979	0.0469818	1.57571	0.115162	0.268572
L p24pr	-0.0481745	-0.0307918	-1.03272	0.301791	0.507957
L p32	0.0513022	0.0236902	0.794541	0.426922	0.627791
L p32pr	0.0142461	0.00926935	0.310883	0.755904	0.867371
L p47r	-0.0789835	-0.0307928	-1.03275	0.301775	0.507937
L p9-46v	-0.110649	-0.0470996	-1.57966	0.114254	0.267159
L pOFC	-0.0444083	-0.0135717	-0.455179	0.649003	0.798321
L s32	-0.103505	-0.0507731	-1.70287	0.0886616	0.224114
L s6-8	0.0138293	0.00913865	0.306499	0.759239	0.869258
L v23ab	-0.130486	-0.110243	-3.6974	0.000220403	0.00221991
R 10d	-0.154739	-0.0571064	-1.91528	0.0555203	0.16072
R 10pp	-0.18547	-0.0665577	-2.23226	0.0256464	0.0920588
R 10r	-0.107151	-0.0414169	-1.38907	0.164879	0.342417
R 10v	-0.248187	-0.0905335	-3.03638	0.00240804	0.0151005
R 11l	0.0922069	0.0295213	0.99011	0.322174	0.529097
R 13l	0.031994	0.0152806	0.512493	0.608331	0.770305
R 1	-0.0665153	-0.0157496	-0.528222	0.597371	0.762554
R 23c	-0.0311887	-0.0181845	-0.609885	0.541969	0.721352
R 23d	-0.0714851	-0.0473666	-1.58862	0.112217	0.263872
R 24dd	-0.00659095	-0.00391908	-0.131441	0.895432	0.947362
R 24dv	-0.0401179	-0.0282165	-0.946348	0.344022	0.551435
R 25	-0.0733684	-0.0551283	-1.84893	0.0645326	0.179158
R 2	0.0767233	0.0192743	0.646438	0.518029	0.703016
R 31a	-0.0739573	-0.0475785	-1.59573	0.11062	0.26134
R 31pd	0.0308005	0.0214924	0.720827	0.471053	0.665316
R 31pv	0.0401333	0.0293925	0.985787	0.32429	0.531175
R 33pr	0.0383113	0.0225124	0.75504	0.450265	0.648075
R 3a	-0.0405424	-0.0196741	-0.659844	0.509388	0.696302
R 3b	0.129318	0.0434531	1.45736	0.145086	0.314622
R 43	-0.084653	-0.0499202	-1.67426	0.0941486	0.233707
R 44	-0.0382947	-0.016432	-0.55111	0.581586	0.750956
R 45	-0.0348496	-0.0166504	-0.558434	0.576576	0.74704
R 46	-0.0941295	-0.0230041	-0.77153	0.440433	0.639731
R 47l	-0.0198183	-0.00985516	-0.33053	0.741015	0.858613
R 47m	-0.0130716	-0.00978286	-0.328105	0.742847	0.859608
R 47s	-0.065633	-0.0269706	-0.904562	0.365746	0.572049
R 4	0.253417	0.0492417	1.6515	0.0987051	0.241465
R 52	-0.0150996	-0.0397947	-1.33466	0.182053	0.365982
R 55b	0.0566161	0.0410457	1.37662	0.168697	0.347794
R 5L	0.0308007	0.0197609	0.662756	0.50752	0.694933
R 5m	-0.0448351	-0.0198744	-0.666562	0.505086	0.692975
R 5mv	-0.0107642	-0.0063745	-0.213793	0.830718	0.911495
R 6a	0.171767	0.0732824	2.4578	0.0140163	0.0586887
R 6d	0.144724	0.0592351	1.98667	0.0470189	0.142703
R 6ma	-0.0955609	-0.0328902	-1.1031	0.270043	0.473394
R 6mp	0.0601524	0.0252765	0.847744	0.396626	0.600889
R 6r	-0.211048	-0.0787692	-2.64182	0.00827454	0.0394135
R 6v	-0.0533994	-0.0160097	-0.536947	0.59133	0.758188
R 7AL	0.000943804	0.000461527	0.0154791	0.987651	0.994221
R 7Am	0.0438246	0.0180373	0.604948	0.545244	0.724021
R 7PC	-0.184688	-0.0688171	-2.30804	0.0210419	0.0795616
R 7PL	0.00703945	0.0046197	0.154939	0.876876	0.936889
R 7Pm	0.0281663	0.0170526	0.571925	0.567402	0.740319
R 7m	-0.100452	-0.0483114	-1.6203	0.105237	0.252463
R 8Ad	0.0652947	0.025039	0.839777	0.401078	0.604904
R 8Av	-0.0720982	-0.0220563	-0.739741	0.459496	0.655725
R 8BL	0.0430364	0.0166005	0.556761	0.577718	0.747944
R 8BM	-0.104366	-0.0541414	-1.81584	0.0694616	0.188792
R 8C	-0.0280812	-0.0115647	-0.387864	0.698135	0.83097
R 9-46d	0.256182	0.0594962	1.99543	0.0460559	0.140625
R 9a	-0.00376524	-0.00139055	-0.0466374	0.962804	0.981538
R 9m	-0.229422	-0.0734769	-2.46433	0.0137641	0.0579108
R 9p	-0.0789277	-0.0314763	-1.05568	0.291172	0.496886
R A1	0.00767974	0.00658157	0.220738	0.825307	0.90844
R A4	-0.0653727	-0.0336622	-1.12899	0.258963	0.460981
R A5	-0.141247	-0.0655912	-2.19985	0.0278681	0.0978411
R AAIC	-0.0240342	-0.0141691	-0.475214	0.634658	0.78849
R AIP	-0.0773692	-0.0269054	-0.902373	0.366907	0.573247
R AVI	-0.0421502	-0.0337627	-1.13236	0.257543	0.459363
R DVT	-0.101198	-0.0511027	-1.71392	0.0866118	0.220409
R EC	0.00175713	0.000412842	0.0138462	0.988953	0.994829
R FEF	0.0518561	0.0289962	0.972499	0.330855	0.538007
R FFC	-0.18035	-0.0556918	-1.86784	0.0618496	0.173768
R FOP1	0.0192806	0.0192041	0.644082	0.519555	0.704151
R FOP2	0.027652	0.0379535	1.27292	0.203114	0.393464
R FOP3	-0.0151276	-0.0339684	-1.13926	0.254656	0.456176
R FOP4	0.0218741	0.020188	0.677082	0.498389	0.687795
R FOP5	-0.00380656	-0.00368712	-0.123662	0.901589	0.95057
R FST	-0.0349323	-0.0175027	-0.587018	0.557221	0.733047
R H	0.133199	0.0455238	1.52681	0.126878	0.287014
R IFJa	-0.103186	-0.0737729	-2.47425	0.013388	0.056734
R IFJp	-0.0460034	-0.0542115	-1.81819	0.0691018	0.188167
R IFSa	-0.215318	-0.0740783	-2.48449	0.0130096	0.0555037
R IFSp	-0.107563	-0.0478814	-1.60588	0.108369	0.257621
R IP0	-0.0275214	-0.0187621	-0.629258	0.529212	0.711688
R IP1	-0.123542	-0.0499595	-1.67558	0.0938896	0.233222
R IP2	-0.125439	-0.0542073	-1.81805	0.0691231	0.188216
R IPS1	0.104777	0.0571433	1.91652	0.0553625	0.160379
R Ig	-0.0536269	-0.0685619	-2.29948	0.021523	0.0809455
R LBelt	-0.0226263	-0.0165943	-0.556553	0.57786	0.748048
R LIPd	0.0267514	0.0231734	0.777207	0.437077	0.636678
R LIPv	-0.042855	-0.0244629	-0.820455	0.412	0.614585
R LO1	-0.033608	-0.0253484	-0.850155	0.395284	0.59973
R LO2	-0.00031287	-0.000254019	-0.0085195	0.993203	0.996844
R LO3	-0.0871067	-0.0470956	-1.57953	0.114285	0.2672
R MBelt	0.0142001	0.0123433	0.413978	0.67891	0.818248
R MIP	-0.0317937	-0.0151376	-0.507697	0.611691	0.772817
R MI	0.05071	0.0321063	1.07681	0.281625	0.486522
R MST	0.089187	0.0602278	2.01997	0.0434457	0.134872
R MT	-0.0122616	-0.00822807	-0.275959	0.782592	0.883509
R OFC	-0.19059	-0.0392468	-1.31629	0.188144	0.373995
R OP1	-0.0218856	-0.0172673	-0.579124	0.562534	0.736795
R OP2-3	-0.0669494	-0.0704949	-2.36431	0.0181057	0.0711155
R OP4	-0.101265	-0.0505627	-1.69581	0.0899906	0.226412
R PBelt	-0.000934743	-0.000674355	-0.0226171	0.981957	0.9915
R PCV	-0.00900441	-0.00398775	-0.133744	0.893611	0.946348
R PEF	0.030418	0.020241	0.678858	0.497262	0.686856
R PF	-0.156772	-0.05025	-1.68532	0.0919956	0.229993
R PFcm	-0.0585315	-0.0431989	-1.44884	0.147452	0.317845
R PFm	-0.146576	-0.0272301	-0.913264	0.361152	0.567841
R PFop	-0.0418142	-0.0203477	-0.682438	0.494997	0.685049
R PFt	-0.0923097	-0.0442512	-1.48413	0.137844	0.303807
R PGi	0.0229162	0.00410231	0.137586	0.890573	0.944655
R PGp	-0.186463	-0.053293	-1.78738	0.0739427	0.19724
R PGs	-0.235579	-0.0583402	-1.95666	0.050449	0.150107
R PHA1	0.0516712	0.0439411	1.47373	0.140624	0.308088
R PHA2	0.0365596	0.0609465	2.04407	0.0410046	0.12935
R PHA3	0.0491555	0.0711534	2.3864	0.0170553	0.0680235
R PHT	-0.0922899	-0.0283203	-0.949828	0.34225	0.549622
R PH	-0.13178	-0.0448816	-1.50527	0.132324	0.295562
R PIT	-0.138283	-0.0477467	-1.60137	0.109366	0.259361
R PI	-0.00756723	-0.00977172	-0.327732	0.74313	0.85979
R POS1	-0.144346	-0.0697578	-2.33959	0.0193483	0.0747252
R POS2	-0.0695022	-0.0148609	-0.498416	0.618215	0.777565
R PSL	-0.0287598	-0.0132218	-0.443442	0.657467	0.803761
R PeEc	0.0773893	0.0216804	0.727133	0.467182	0.661992
R Pir	-0.0641333	-0.023891	-0.801275	0.423015	0.624264
R PoI1	-0.048806	-0.0241859	-0.811166	0.417313	0.619128
R PoI2	-0.2146	-0.0834452	-2.79865	0.00515343	0.0273171
R PreS	-0.0821183	-0.0366501	-1.2292	0.219061	0.413457
R ProS	-0.0631254	-0.0393279	-1.31901	0.187233	0.372755
R RI	-0.0104784	-0.0111549	-0.374121	0.708332	0.837474
R RSC	-0.0722798	-0.0341514	-1.1454	0.252106	0.453142
R SCEF	-0.0873732	-0.0488713	-1.63908	0.101266	0.245776
R SFL	-0.0777845	-0.0472536	-1.58483	0.113075	0.265225
R STGa	-0.0173185	-0.0119847	-0.401951	0.687739	0.824085
R STSda	-0.123236	-0.052462	-1.75951	0.0785583	0.205838
R STSdp	0.0348652	0.0189929	0.636998	0.524159	0.707794
R STSva	-0.0127475	-0.00728518	-0.244336	0.806982	0.898067
R STSvp	-0.130794	-0.0552828	-1.85412	0.0637876	0.177702
R STV	-0.131511	-0.050525	-1.69455	0.0902306	0.226791
R TA2	-0.0192669	-0.0121719	-0.408232	0.683123	0.820992
R TE1a	-0.00258822	-0.000964956	-0.0323634	0.974184	0.987327
R TE1m	-0.0287021	-0.0127417	-0.427342	0.669151	0.811537
R TE1p	-0.195374	-0.0510004	-1.71049	0.0872441	0.221508
R TE2a	-0.0138723	-0.00281605	-0.094447	0.924758	0.962517
R TE2p	0.0194096	0.00534767	0.179354	0.857668	0.926314
R TF	-0.0220305	-0.00532375	-0.178552	0.858297	0.926703
R TGd	-0.248211	-0.0550865	-1.84753	0.0647351	0.179564
R TGv	-0.129516	-0.0395288	-1.32575	0.184991	0.369861
R TPOJ1	-0.0712756	-0.0237076	-0.795124	0.426583	0.627458
R TPOJ2	0.00211203	0.000869899	0.0291753	0.976726	0.988704
R TPOJ3	-0.049409	-0.0252965	-0.848414	0.396252	0.600555
R V1	-0.469273	-0.041796	-1.40179	0.161048	0.336958
R V2	-0.475991	-0.0565682	-1.89723	0.0578614	0.165602
R V3A	-0.0361497	-0.0151814	-0.509165	0.610661	0.772044
R V3B	0.0103953	0.010892	0.365305	0.714901	0.841866
R V3CD	-0.0709232	-0.0424109	-1.42241	0.154977	0.328606
R V3	0.0987777	0.0190007	0.637261	0.523987	0.707657
R V4	-0.0258981	-0.00791132	-0.265336	0.790763	0.888264
R V4t	0.00399941	0.00340074	0.114057	0.909198	0.954231
R V6A	-0.0168919	-0.013306	-0.446268	0.655425	0.802318
R V6	-0.0552534	-0.0254566	-0.853785	0.39327	0.597947
R V7	0.0650397	0.0524105	1.75778	0.0788522	0.206393
R V8	-0.0403843	-0.0291882	-0.978938	0.327663	0.534747
R VIP	0.00658833	0.0038471	0.129027	0.897342	0.948278
R VMV1	-0.023716	-0.0143157	-0.48013	0.631158	0.786273
R VMV2	0.0283478	0.020442	0.685598	0.493002	0.683488
R VMV3	-0.0519324	-0.0347509	-1.1655	0.243876	0.443623
R VVC	-0.00703047	-0.00364172	-0.122139	0.902794	0.951121
R a10p	-0.132446	-0.0512259	-1.71805	0.0858556	0.219034
R a24	-0.0142011	-0.00670302	-0.224811	0.822136	0.906536
R a24pr	-0.0189493	-0.0119896	-0.402116	0.687618	0.824001
R a32pr	-0.0395477	-0.0288045	-0.966068	0.334062	0.541141
R a47r	0.122116	0.0333075	1.11709	0.264014	0.466559
R a9-46v	0.0573217	0.0218365	0.732369	0.463981	0.659452
R d23ab	-0.0727465	-0.0646892	-2.1696	0.0300895	0.103346
R d32	-0.121884	-0.0460849	-1.54563	0.122263	0.279935
R i6-8	-0.0396827	-0.0277931	-0.932146	0.351311	0.55833
R p10p	-0.0565381	-0.019879	-0.666716	0.504988	0.692928
R p24	-0.0503508	-0.0275358	-0.923517	0.355787	0.562867
R p24pr	-0.0872272	-0.0462771	-1.55208	0.120713	0.277432
R p32	-0.216468	-0.088943	-2.98304	0.00286928	0.0172975
R p32pr	0.00176209	0.000933912	0.0313223	0.975014	0.987683
R p47r	-0.0487615	-0.0204722	-0.686611	0.492363	0.68297
R p9-46v	-0.15059	-0.0476972	-1.59971	0.109734	0.259938
R pOFC	0.00493266	0.00189761	0.0636436	0.949257	0.974784
R s32	-0.115893	-0.0578828	-1.94132	0.0522819	0.153996
R s6-8	-0.0393495	-0.0255655	-0.857436	0.39125	0.596052
R v23ab	-0.0380336	-0.0310022	-1.03977	0.2985	0.504491

## Sheet: Table S9
Table S11: Results of linear regression models comparing cortical Gaussian curvature in regions defined by the HCP-MMP parcellation between all OCD cases and controls
Region	Beta	Cohen's D	T-statistic	P-value	P-value (FDR)
L 10d	0.00056675	0.0808837	2.71274	0.00669822	0.0334289
L 10pp	0.000655215	0.0753476	2.52707	0.0115359	0.0506662
L 10r	0.000195784	0.0206391	0.69221	0.488841	0.680163
L 10v	0.000312936	0.0384028	1.28798	0.197818	0.386846
L 11l	9.75669e-05	0.0148251	0.497215	0.619061	0.778135
L 13l	0.000569928	0.0761883	2.55526	0.0106433	0.0477522
L 1	6.83158e-05	0.0118865	0.398658	0.690164	0.825745
L 23c	-0.000193096	-0.0384386	-1.28918	0.1974	0.386279
L 23d	0.000251259	0.0298364	1.00068	0.317037	0.523857
L 24dd	0.000171234	0.0335024	1.12363	0.26123	0.463329
L 24dv	0.000232642	0.0363455	1.21898	0.222914	0.418258
L 25	0.000274545	0.0293491	0.984333	0.325004	0.531888
L 2	5.8724e-06	0.00145597	0.0488315	0.961056	0.980695
L 31a	7.6867e-05	0.00731419	0.245309	0.806228	0.897564
L 31pd	0.000137512	0.0214677	0.72	0.471562	0.665799
L 31pv	-0.000200701	-0.0309908	-1.03939	0.298677	0.504686
L 33pr	0.000483955	0.0638536	2.14157	0.0322812	0.108801
L 3a	6.48597e-05	0.0130347	0.437169	0.662009	0.806939
L 3b	1.43089e-05	0.00334635	0.112233	0.910644	0.955103
L 43	0.000110544	0.0151136	0.506892	0.612256	0.773266
L 44	0.000693174	0.108609	3.64261	0.000272918	0.00264373
L 45	0.000419321	0.0775509	2.60096	0.00932656	0.0431875
L 46	0.000115878	0.0177813	0.596364	0.550962	0.728367
L 47l	0.000525897	0.0738688	2.47747	0.0132682	0.0563368
L 47m	-8.8989e-05	-0.0101027	-0.338832	0.734752	0.85454
L 47s	0.000782895	0.0838315	2.81161	0.00495076	0.0264761
L 4	0.000474104	0.0845225	2.83478	0.00460611	0.0250316
L 52	9.82013e-05	0.0191661	0.642809	0.520381	0.704745
L 55b	0.000181924	0.0252559	0.847051	0.397011	0.601261
L 5L	0.000765754	0.12255	4.11018	4.02377e-05	0.000560579
L 5m	0.000194524	0.0284684	0.954797	0.339732	0.54698
L 5mv	-4.0374e-05	-0.00838788	-0.281319	0.778479	0.881072
L 6a	0.000263996	0.0624138	2.09328	0.0363797	0.118686
L 6d	0.000607154	0.0757003	2.5389	0.0111536	0.049421
L 6ma	0.000357911	0.0514529	1.72567	0.0844757	0.216519
L 6mp	0.000539234	0.0830766	2.78629	0.00535383	0.0281542
L 6r	0.000204033	0.042095	1.41182	0.158073	0.33281
L 6v	0.000408596	0.0504245	1.69117	0.0908725	0.22795
L 7AL	0.000567602	0.0794165	2.66353	0.00775997	0.0375292
L 7Am	0.000132311	0.0180978	0.606979	0.543895	0.723031
L 7PC	0.000109683	0.0173447	0.581719	0.560785	0.735509
L 7PL	0.00041154	0.0506356	1.69826	0.0895281	0.22563
L 7Pm	0.000188335	0.0219355	0.735689	0.461958	0.657723
L 7m	-0.000204282	-0.0289371	-0.970515	0.331842	0.538977
L 8Ad	0.000120833	0.0226642	0.76013	0.447217	0.645529
L 8Av	0.000190723	0.0326711	1.09575	0.273247	0.477032
L 8BL	0.000257419	0.0352516	1.18229	0.237151	0.435583
L 8BM	-2.89936e-05	-0.00521952	-0.175056	0.861043	0.928204
L 8C	0.000529397	0.113354	3.80176	0.000145567	0.00158317
L 9-46d	0.000362042	0.0660793	2.21622	0.0267261	0.0948979
L 9a	0.000302345	0.0481557	1.61508	0.106363	0.254347
L 9m	0.000384369	0.072089	2.41778	0.015655	0.063772
L 9p	0.000220124	0.0341401	1.14502	0.252263	0.453343
L A1	-0.000352607	-0.032597	-1.09326	0.274337	0.478242
L A4	-0.000160036	-0.0246913	-0.828115	0.407649	0.610778
L A5	-6.60863e-05	-0.0088434	-0.296597	0.766788	0.874009
L AAIC	8.01519e-05	0.00757152	0.253939	0.799554	0.893588
L AIP	4.38418e-05	0.00907899	0.304498	0.760762	0.870072
L AVI	0.000259349	0.0445827	1.49525	0.134919	0.299404
L DVT	1.04598e-05	0.00170547	0.0571994	0.954389	0.977323
L EC	0.000499094	0.0454823	1.52542	0.127224	0.287546
L FEF	0.000533777	0.0825761	2.7695	0.00563716	0.0293056
L FFC	0.00033643	0.0555527	1.86317	0.0625031	0.175039
L FOP1	0.000397834	0.0476929	1.59956	0.109766	0.259995
L FOP2	0.000276342	0.0454535	1.52445	0.127465	0.287946
L FOP3	0.000554522	0.0871862	2.92412	0.00347153	0.0201028
L FOP4	0.000147005	0.0295301	0.990404	0.32203	0.528945
L FOP5	-3.85279e-05	-0.00814352	-0.273124	0.784771	0.884779
L FST	0.000129206	0.0173901	0.583244	0.559758	0.734749
L H	0.000915875	0.134009	4.49449	7.14831e-06	0.000136498
L IFJa	6.15898e-05	0.0108234	0.363004	0.716619	0.842998
L IFJp	0.000104622	0.0161319	0.541044	0.588504	0.756149
L IFSa	0.000108506	0.0174221	0.584317	0.559036	0.734203
L IFSp	0.000243689	0.0350378	1.17513	0.240006	0.439013
L IP0	-1.72279e-05	-0.00305513	-0.102465	0.918392	0.95925
L IP1	0.000297127	0.0539431	1.80919	0.0704887	0.190755
L IP2	0.000370766	0.0713869	2.39423	0.0166959	0.0669366
L IPS1	0.000150215	0.0249051	0.835288	0.4036	0.607142
L Ig	-0.000125975	-0.0173914	-0.583287	0.559729	0.734722
L LBelt	-0.000160973	-0.0252666	-0.847412	0.396811	0.601037
L LIPd	-0.000214811	-0.0324176	-1.08725	0.276986	0.481328
L LIPv	0.000301698	0.0406045	1.36183	0.173321	0.354008
L LO1	0.000132194	0.0159005	0.533282	0.593865	0.76003
L LO2	0.000480572	0.0590072	1.97903	0.0478733	0.144552
L LO3	0.00056009	0.0617935	2.07248	0.0382774	0.123085
L MBelt	-6.21579e-05	-0.00731491	-0.245333	0.80621	0.897555
L MIP	0.000308039	0.0550575	1.84656	0.0648759	0.179871
L MI	0.00050499	0.0603666	2.02462	0.042965	0.133831
L MST	-5.39758e-05	-0.00696986	-0.233761	0.815181	0.902703
L MT	0.000130268	0.0155832	0.52264	0.60125	0.765242
L OFC	0.000781471	0.103409	3.46821	0.000528832	0.00450185
L OP1	3.20923e-05	0.00439484	0.147398	0.882825	0.940268
L OP2-3	-0.000276549	-0.0464922	-1.55929	0.118997	0.274636
L OP4	0.000406778	0.0702926	2.35753	0.0184395	0.0721126
L PBelt	-0.000111656	-0.0199276	-0.668347	0.503946	0.692132
L PCV	0.000620865	0.0819949	2.75001	0.00598312	0.030681
L PEF	0.000250092	0.0323254	1.08415	0.278355	0.48287
L PF	0.000244714	0.0477361	1.60101	0.109445	0.259463
L PFcm	0.00036272	0.059392	1.99194	0.0464382	0.14146
L PFm	0.000444642	0.0899145	3.01562	0.0025788	0.0159259
L PFop	-7.63403e-05	-0.0116925	-0.392152	0.694964	0.828838
L PFt	0.000121286	0.0227242	0.762141	0.446016	0.644454
L PGi	0.000170815	0.0358277	1.20162	0.229575	0.426275
L PGp	0.000214038	0.0307364	1.03086	0.302661	0.508882
L PGs	0.000535599	0.0951119	3.18994	0.00143277	0.00999345
L PHA1	0.00033263	0.0433824	1.45499	0.145741	0.315557
L PHA2	0.000973006	0.118145	3.96245	7.53289e-05	0.000928554
L PHA3	0.000606602	0.0812483	2.72497	0.00645553	0.0325216
L PHT	0.000174667	0.025832	0.866374	0.386331	0.591422
L PH	7.06928e-05	0.0114297	0.383339	0.701487	0.833109
L PIT	0.00013034	0.0155423	0.52127	0.602204	0.765831
L PI	6.06259e-05	0.0126934	0.425721	0.670332	0.812398
L POS1	-0.000321072	-0.0571462	-1.91661	0.05535	0.160353
L POS2	0.000230708	0.0419721	1.40769	0.159291	0.334487
L PSL	0.000364364	0.0550094	1.84495	0.0651105	0.180364
L PeEc	0.000515651	0.0616517	2.06772	0.0387229	0.124107
L Pir	0.00024889	0.0172077	0.577124	0.563884	0.737852
L PoI1	0.000234462	0.0259425	0.870078	0.384304	0.589584
L PoI2	9.82109e-06	0.000987969	0.0331353	0.973568	0.987031
L PreS	-0.000394097	-0.0460499	-1.54446	0.122548	0.280339
L ProS	-0.00072409	-0.0680005	-2.28065	0.0226153	0.0839452
L RI	9.53917e-05	0.0172308	0.577899	0.563361	0.737419
L RSC	0.000350636	0.052597	1.76404	0.0777929	0.204413
L SCEF	0.000117083	0.0214109	0.718095	0.472736	0.666827
L SFL	0.000396582	0.0526706	1.76651	0.0773781	0.203669
L STGa	0.000256951	0.0244909	0.821394	0.411466	0.614153
L STSda	-0.00012255	-0.0172417	-0.578264	0.563115	0.737226
L STSdp	-0.000107901	-0.0186715	-0.626221	0.531202	0.713214
L STSva	-3.7005e-05	-0.00589183	-0.197605	0.843363	0.918708
L STSvp	4.05429e-05	0.00719211	0.241214	0.8094	0.89946
L STV	-0.00015576	-0.0188194	-0.63118	0.527955	0.710828
L TA2	7.31418e-05	0.00848805	0.284679	0.775903	0.879407
L TE1a	1.34831e-05	0.00199346	0.0668581	0.946698	0.973456
L TE1m	7.93521e-05	0.0112175	0.37622	0.706771	0.836575
L TE1p	9.21194e-05	0.0151057	0.506627	0.612441	0.773403
L TE2a	0.000377691	0.0595953	1.99875	0.0456951	0.13984
L TE2p	3.79241e-05	0.00530775	0.178015	0.858719	0.926978
L TF	0.000462913	0.060381	2.0251	0.0429155	0.133735
L TGd	0.000362577	0.0505466	1.69527	0.0900929	0.226577
L TGv	0.00037279	0.0398678	1.33712	0.181252	0.364924
L TPOJ1	-0.000139442	-0.0229413	-0.769424	0.441682	0.6407
L TPOJ2	0.000133962	0.0212547	0.712856	0.475972	0.6694
L TPOJ3	-5.74399e-05	-0.00478018	-0.160321	0.872635	0.93444
L V1	0.000149758	0.031572	1.05889	0.289708	0.495284
L V2	8.32332e-05	0.020349	0.682482	0.494969	0.685021
L V3A	0.000373768	0.0603185	2.02301	0.043131	0.13421
L V3B	-5.11878e-06	-0.000742077	-0.0248884	0.980145	0.990563
L V3CD	0.000307081	0.0389152	1.30517	0.191902	0.378978
L V3	0.000179494	0.0411791	1.3811	0.167317	0.345894
L V4	0.000185125	0.0412761	1.38435	0.16632	0.344504
L V4t	0.000552742	0.0622318	2.08718	0.0369279	0.119992
L V6A	0.000325846	0.0344262	1.15461	0.24831	0.448769
L V6	0.000137398	0.022083	0.740637	0.458952	0.655346
L V7	0.00042825	0.0538981	1.80768	0.0707234	0.191234
L V8	-0.000111683	-0.0143738	-0.482079	0.629774	0.785335
L VIP	0.000445897	0.0566912	1.90135	0.0573194	0.164468
L VMV1	0.00055408	0.0604008	2.02577	0.042847	0.133549
L VMV2	-0.000148003	-0.0168949	-0.566634	0.570991	0.742893
L VMV3	-0.000367237	-0.0446843	-1.49866	0.134033	0.298042
L VVC	0.000351977	0.0515018	1.72731	0.0841806	0.215958
L a10p	0.000597809	0.0761199	2.55297	0.0107136	0.0479642
L a24	0.000559924	0.0603424	2.02381	0.0430485	0.134036
L a24pr	0.000721025	0.0747934	2.50848	0.01216	0.0527545
L a32pr	0.000184545	0.0272823	0.915014	0.360233	0.566995
L a47r	0.000532953	0.0696499	2.33597	0.0195363	0.0752305
L a9-46v	0.000531627	0.0738774	2.47776	0.0132574	0.056298
L d23ab	0.00016932	0.0235569	0.790071	0.429528	0.630065
L d32	-1.83881e-05	-0.00300159	-0.10067	0.919817	0.959989
L i6-8	0.000447925	0.0656196	2.2008	0.0278007	0.09769
L p10p	0.000740517	0.099982	3.35327	0.000805195	0.0063152
L p24	0.00123204	0.116975	3.92321	8.86744e-05	0.00105967
L p24pr	-6.6994e-05	-0.00756277	-0.253646	0.799781	0.893713
L p32	0.000725387	0.0787448	2.64101	0.00829453	0.0394891
L p32pr	0.000191885	0.0336659	1.12911	0.25891	0.460922
L p47r	0.000281127	0.0408903	1.37141	0.170316	0.34995
L p9-46v	0.000108835	0.0182399	0.611745	0.540738	0.720458
L pOFC	0.00111667	0.107799	3.61543	0.00030312	0.00287844
L s32	-0.000317063	-0.0285617	-0.957924	0.338152	0.545416
L s6-8	0.000758678	0.0859467	2.88255	0.00396336	0.0222837
L v23ab	0.000233483	0.0272305	0.913277	0.361146	0.567837
R 10d	0.000119131	0.0152863	0.512684	0.608197	0.77025
R 10pp	0.000214524	0.0255381	0.856516	0.391758	0.596495
R 10r	0.000238665	0.0244741	0.820833	0.411785	0.61438
R 10v	0.000332569	0.0420421	1.41004	0.158596	0.333497
R 11l	0.000578949	0.0898847	3.01462	0.00258729	0.0159645
R 13l	0.000437554	0.0478702	1.60551	0.108452	0.257762
R 1	0.00046563	0.0758684	2.54453	0.0109755	0.0488438
R 23c	-4.95e-05	-0.00932209	-0.312652	0.75456	0.866666
R 23d	0.000438959	0.0555053	1.86158	0.0627271	0.175487
R 24dd	0.000140435	0.0275565	0.92421	0.355426	0.562544
R 24dv	0.000273572	0.0477627	1.6019	0.109247	0.259157
R 25	4.58168e-05	0.00453965	0.152254	0.878993	0.938034
R 2	0.000165701	0.0359174	1.20463	0.228411	0.424917
R 31a	-0.000223912	-0.0210655	-0.70651	0.479907	0.672812
R 31pd	0.000183861	0.0252388	0.84648	0.39733	0.601591
R 31pv	-8.35236e-05	-0.0121481	-0.407432	0.68371	0.821399
R 33pr	0.000169423	0.0235769	0.790741	0.429137	0.629693
R 3a	-3.30774e-05	-0.00670136	-0.224755	0.82218	0.906563
R 3b	0.000260795	0.0631509	2.118	0.0342294	0.113519
R 43	6.56105e-05	0.0100319	0.336456	0.736542	0.855756
R 44	0.000410034	0.0618189	2.07333	0.0381982	0.12292
R 45	0.000550104	0.0841543	2.82243	0.00478693	0.0257968
R 46	0.000229939	0.0398123	1.33526	0.181859	0.365737
R 47l	0.000803636	0.106594	3.57504	0.000353835	0.00326252
R 47m	0.00052443	0.0559808	1.87753	0.0605101	0.171085
R 47s	0.000441031	0.0505339	1.69484	0.0901739	0.226715
R 4	0.000264564	0.0457456	1.53425	0.125038	0.284304
R 52	4.9958e-05	0.00949154	0.318335	0.750246	0.86413
R 55b	0.00075744	0.0965401	3.23784	0.0012131	0.00876349
R 5L	0.000456671	0.0682424	2.28877	0.022139	0.0825874
R 5m	0.000321846	0.048342	1.62133	0.105016	0.252056
R 5mv	0.000143172	0.0264764	0.887988	0.374595	0.580485
R 6a	0.000506797	0.10889	3.65204	0.000263119	0.00256639
R 6d	0.000798693	0.0981846	3.29299	0.000998907	0.00751572
R 6ma	0.000299538	0.0439061	1.47256	0.14094	0.308515
R 6mp	0.000546904	0.0938085	3.14622	0.00166471	0.0112717
R 6r	0.000125067	0.0276157	0.926195	0.354394	0.561488
R 6v	-9.47174e-05	-0.0131894	-0.442358	0.658252	0.804359
R 7AL	0.000301576	0.0426674	1.43101	0.152496	0.325126
R 7Am	0.000647749	0.0854831	2.867	0.00416304	0.0231499
R 7PC	0.000297958	0.0466659	1.56512	0.117626	0.272463
R 7PL	0.000398567	0.0471214	1.5804	0.114087	0.266876
R 7Pm	0.000334288	0.0378034	1.26788	0.204906	0.395728
R 7m	0.000310344	0.0450465	1.51081	0.130908	0.293263
R 8Ad	0.000105057	0.0198657	0.66627	0.505272	0.693076
R 8Av	0.000482701	0.0833659	2.79599	0.00519598	0.0274954
R 8BL	0.000575037	0.0908084	3.0456	0.00233556	0.0147462
R 8BM	-8.15965e-05	-0.0146688	-0.491973	0.622763	0.780518
R 8C	0.000306784	0.0650093	2.18033	0.0292842	0.101353
R 9-46d	0.000662002	0.120778	4.05075	5.19102e-05	0.000688111
R 9a	0.000205252	0.0286193	0.959858	0.337178	0.544395
R 9m	0.000302277	0.0608184	2.03977	0.041431	0.130307
R 9p	0.000257555	0.0377841	1.26723	0.205137	0.39598
R A1	-0.00017871	-0.0147073	-0.493265	0.621849	0.779928
R A4	-9.61281e-05	-0.01504	-0.504424	0.613988	0.77449
R A5	3.65215e-05	0.00618592	0.207468	0.835654	0.914244
R AAIC	0.00065299	0.0628331	2.10734	0.0351428	0.115781
R AIP	0.000114283	0.0226386	0.759271	0.44773	0.645978
R AVI	0.000363413	0.0633949	2.12619	0.0335417	0.111867
R DVT	0.000104159	0.0185303	0.621483	0.534314	0.715537
R EC	-5.05075e-05	-0.00391262	-0.131225	0.895603	0.947442
R FEF	0.000340937	0.0502922	1.68674	0.0917224	0.229481
R FFC	0.000252141	0.0425767	1.42797	0.15337	0.326348
R FOP1	0.000246468	0.0337941	1.13341	0.257101	0.458954
R FOP2	0.000344775	0.0552404	1.8527	0.0639913	0.178111
R FOP3	-0.000114743	-0.0182097	-0.61073	0.541409	0.720926
R FOP4	0.000294252	0.0532944	1.78743	0.0739354	0.19723
R FOP5	0.000140569	0.0295846	0.992233	0.321137	0.528058
R FST	0.000241452	0.0307397	1.03097	0.302609	0.508844
R H	0.000929371	0.132217	4.43439	9.45284e-06	0.000172012
R IFJa	3.03872e-05	0.00459099	0.153976	0.877635	0.937314
R IFJp	-3.8277e-05	-0.0057872	-0.194096	0.84611	0.920145
R IFSa	0.000190491	0.0290619	0.974699	0.329762	0.536867
R IFSp	0.0001756	0.0272668	0.914494	0.360506	0.567248
R IP0	-6.20804e-07	-0.000100461	-0.00336933	0.997312	0.998721
R IP1	0.000370585	0.0618197	2.07336	0.0381958	0.122917
R IP2	0.000167959	0.0291577	0.977912	0.32817	0.535297
R IPS1	0.000551227	0.086991	2.91757	0.00354508	0.0204402
R Ig	-5.82697e-05	-0.00898647	-0.301395	0.763127	0.871571
R LBelt	-4.2491e-05	-0.00540639	-0.181324	0.856122	0.925448
R LIPd	0.000382289	0.0496869	1.66644	0.0956956	0.236374
R LIPv	0.000676169	0.0904289	3.03288	0.00243612	0.0152301
R LO1	0.000474354	0.0545175	1.82845	0.0675479	0.185188
R LO2	0.000335309	0.0361489	1.21239	0.225426	0.421326
R LO3	7.48495e-05	0.00835275	0.280141	0.779382	0.881615
R MBelt	0.000502233	0.0547143	1.83505	0.0665638	0.183187
R MIP	0.000311406	0.0519633	1.74278	0.0814394	0.211051
R MI	0.000735713	0.0841681	2.82289	0.00478006	0.0257679
R MST	0.000424656	0.0620764	2.08197	0.0374016	0.121111
R MT	0.000253155	0.0297208	0.996799	0.318916	0.525763
R OFC	0.000811765	0.108728	3.6466	0.000268725	0.0026104
R OP1	-1.45999e-05	-0.00175138	-0.0587392	0.953162	0.97675
R OP2-3	-0.000237071	-0.0397481	-1.3331	0.182566	0.366708
R OP4	0.000149685	0.0262007	0.878741	0.379589	0.585285
R PBelt	0.000196343	0.0289413	0.970656	0.331772	0.538914
R PCV	0.000491437	0.0656961	2.20337	0.0276191	0.0972185
R PEF	0.000479707	0.0712463	2.38951	0.0169116	0.0675804
R PF	0.000374182	0.0699682	2.34665	0.0189861	0.0737159
R PFcm	1.96923e-05	0.00339259	0.113783	0.909415	0.95436
R PFm	0.000292118	0.0600741	2.01481	0.0439836	0.136062
R PFop	0.000342072	0.0446517	1.49756	0.134317	0.298477
R PFt	0.000506519	0.0794061	2.66318	0.00776798	0.0375596
R PGi	0.000172666	0.0333644	1.119	0.2632	0.465544
R PGp	0.000306501	0.046259	1.55147	0.120859	0.277655
R PGs	2.27498e-05	0.00379158	0.127165	0.898815	0.94901
R PHA1	0.00044889	0.0567961	1.90487	0.0568603	0.163485
R PHA2	0.000463787	0.0807511	2.70829	0.00678853	0.0337829
R PHA3	0.000545247	0.0942883	3.16231	0.00157559	0.0107898
R PHT	0.000365958	0.0520811	1.74674	0.080751	0.209844
R PH	0.000156821	0.0236549	0.793356	0.427612	0.628291
R PIT	0.00043788	0.0565135	1.89539	0.0581042	0.166096
R PI	0.000157831	0.0346234	1.16122	0.245612	0.445615
R POS1	-0.000102105	-0.0179359	-0.601549	0.547504	0.725738
R POS2	0.000224819	0.036788	1.23383	0.217332	0.411323
R PSL	0.000368794	0.0524952	1.76062	0.0783696	0.205481
R PeEc	0.000210359	0.0262994	0.882051	0.377796	0.583586
R Pir	-0.000337063	-0.0273697	-0.917945	0.358697	0.565572
R PoI1	-0.000343501	-0.0403397	-1.35294	0.176142	0.357943
R PoI2	-0.000220255	-0.0240324	-0.806019	0.420275	0.621821
R PreS	-0.000136954	-0.013856	-0.464712	0.64216	0.793849
R ProS	-0.000219966	-0.0250336	-0.839597	0.401179	0.604998
R RI	4.4711e-05	0.00830488	0.278536	0.780614	0.882349
R RSC	0.000180706	0.0279687	0.938035	0.348277	0.555566
R SCEF	4.16798e-05	0.00718267	0.240898	0.809645	0.899586
R SFL	0.000290063	0.0332497	1.11515	0.264844	0.467518
R STGa	0.000606299	0.056344	1.88971	0.058861	0.167687
R STSda	-0.000201158	-0.0304227	-1.02034	0.307622	0.51416
R STSdp	-2.56538e-05	-0.00508825	-0.170654	0.864504	0.930202
R STSva	0.000173264	0.0281981	0.94573	0.344337	0.551688
R STSvp	-0.000144746	-0.0271201	-0.909575	0.363095	0.56968
R STV	0.000112069	0.016241	0.544704	0.585984	0.754191
R TA2	5.49765e-05	0.00650012	0.218006	0.827434	0.909662
R TE1a	0.000306375	0.0415134	1.39231	0.163897	0.340978
R TE1m	0.000169048	0.0238115	0.798609	0.424559	0.625698
R TE1p	4.06223e-05	0.00661471	0.221849	0.824441	0.907997
R TE2a	0.000216576	0.0351879	1.18016	0.237999	0.436666
R TE2p	0.000215272	0.0287808	0.965274	0.334459	0.541541
R TF	0.000266718	0.0361216	1.21148	0.225777	0.421799
R TGd	0.000129354	0.0189361	0.635094	0.525399	0.708816
R TGv	0.000335251	0.0363938	1.2206	0.2223	0.417447
R TPOJ1	3.10396e-05	0.00612053	0.205275	0.837366	0.915314
R TPOJ2	-0.000128569	-0.0188726	-0.632963	0.52679	0.70997
R TPOJ3	-9.67048e-05	-0.0132561	-0.444595	0.656634	0.803178
R V1	4.72559e-06	0.00105146	0.0352646	0.97187	0.986135
R V2	-1.95916e-05	-0.00459856	-0.15423	0.877435	0.937196
R V3A	0.000148627	0.0241298	0.809286	0.418394	0.620112
R V3B	0.00039259	0.0591051	1.98231	0.0475048	0.143744
R V3CD	0.000263566	0.0182701	0.612757	0.540068	0.719969
R V3	0.000360952	0.0811936	2.72313	0.00649148	0.0326623
R V4	0.000336119	0.0713379	2.39259	0.0167707	0.0671608
R V4t	0.000263169	0.0274977	0.92224	0.356453	0.563521
R V6A	0.000306021	0.0345604	1.15911	0.246471	0.446591
R V6	-0.000302034	-0.0496384	-1.66481	0.0960201	0.236894
R V7	0.000458058	0.0566935	1.90143	0.0573091	0.164445
R V8	0.000209155	0.0289164	0.969821	0.332188	0.539322
R VIP	0.000249408	0.030064	1.00831	0.313359	0.520088
R VMV1	-8.82445e-05	-0.0102479	-0.343703	0.731086	0.852128
R VMV2	0.000364194	0.0427061	1.43231	0.152125	0.324583
R VMV3	4.86554e-05	0.00619791	0.20787	0.83534	0.914089
R VVC	0.000647172	0.0968581	3.2485	0.00116864	0.00851107
R a10p	-4.50656e-05	-0.00503056	-0.168719	0.866025	0.930947
R a24	0.000622282	0.0697023	2.33773	0.0194447	0.0749596
R a24pr	-0.000159038	-0.0160315	-0.537677	0.590826	0.757774
R a32pr	2.92745e-05	0.00462745	0.155199	0.876671	0.936762
R a47r	0.000854928	0.121463	4.07372	4.70623e-05	0.000637364
R a9-46v	0.000736369	0.0923398	3.09697	0.00196713	0.0128684
R d23ab	-0.000647374	-0.0740157	-2.4824	0.0130863	0.0557347
R d32	0.000150755	0.0256224	0.859343	0.390197	0.595011
R i6-8	0.000320356	0.0453472	1.52089	0.128358	0.289326
R p10p	5.57389e-05	0.00775809	0.260197	0.794724	0.890613
R p24	2.44421e-05	0.0025414	0.0852355	0.932078	0.96623
R p24pr	-0.000190369	-0.0138351	-0.464012	0.642661	0.794264
R p32	-6.70992e-05	-0.00769979	-0.258242	0.796232	0.891575
R p32pr	0.000333093	0.0581393	1.94992	0.0512474	0.151771
R p47r	0.000211996	0.0261499	0.877035	0.380514	0.586121
R p9-46v	0.000197587	0.033923	1.13774	0.255291	0.456874
R pOFC	0.000682521	0.0715741	2.40051	0.0164127	0.0660811
R s32	0.000277749	0.0274328	0.920063	0.357589	0.564586
R s6-8	0.000168476	0.0236321	0.792591	0.428058	0.628685
R v23ab	6.61793e-05	0.00840833	0.282005	0.777953	0.880749

## Sheet: Table S10
Table S12: Results of linear regression models comparing cortical curvature index in regions defined by the HCP-MMP parcellation between all OCD cases and controls
Region	Beta	Cohen's D	T-statistic	P-value	P-value (FDR)
L 10d	0.0146022	0.0485063	1.62684	0.103841	0.250109
L 10pp	0.00737237	0.0315457	1.05801	0.29011	0.495705
L 10r	0.00595985	0.026558	0.890723	0.373125	0.579222
L 10v	0.00107785	0.00369636	0.123971	0.901343	0.950429
L 11l	6.89423e-05	0.000219561	0.0073638	0.994125	0.99725
L 13l	0.0191129	0.0615751	2.06515	0.0389654	0.124686
L 1	-0.00739162	-0.0149023	-0.499804	0.617238	0.7768
L 23c	-0.00724416	-0.0372544	-1.24947	0.211559	0.404076
L 23d	-0.00362811	-0.0272804	-0.914951	0.360266	0.567037
L 24dd	0.00182389	0.00997525	0.334558	0.737974	0.856647
L 24dv	0.00163425	0.0120969	0.405714	0.684972	0.822262
L 25	0.000134551	0.000905736	0.0303773	0.975768	0.988102
L 2	-0.00283273	-0.00666543	-0.22355	0.823117	0.907176
L 31a	0.00218651	0.016003	0.536723	0.591486	0.758285
L 31pd	0.00586844	0.0326837	1.09617	0.273062	0.476805
L 31pv	-0.000456325	-0.00309827	-0.103912	0.917244	0.958657
L 33pr	0.00389274	0.0493578	1.6554	0.0979126	0.240153
L 3a	0.00907379	0.0318033	1.06664	0.28619	0.491461
L 3b	-0.0165576	-0.0383139	-1.285	0.198857	0.3881
L 43	-0.000971961	-0.00724424	-0.242963	0.808045	0.898647
L 44	0.00734794	0.0412498	1.38347	0.16659	0.344817
L 45	0.00188228	0.00776361	0.260382	0.794581	0.890505
L 46	0.0197518	0.0491066	1.64697	0.0996329	0.24312
L 47l	0.0100828	0.0544972	1.82777	0.0676499	0.185346
L 47m	-0.00246438	-0.0226581	-0.759926	0.447338	0.645651
L 47s	0.0163903	0.076504	2.56585	0.0103243	0.0466489
L 4	0.0401064	0.0471764	1.58224	0.113665	0.266165
L 52	0.000618757	0.00718632	0.24102	0.80955	0.899531
L 55b	0.00418173	0.0215438	0.722552	0.469993	0.664403
L 5L	0.0198768	0.127743	4.28436	1.87085e-05	0.00029979
L 5m	0.00146539	0.0120381	0.403744	0.68642	0.823166
L 5mv	0.00110432	0.00853242	0.286167	0.774763	0.87877
L 6a	0.00932701	0.0288774	0.968513	0.33284	0.539957
L 6d	0.0224305	0.0668327	2.24149	0.0250429	0.0904514
L 6ma	0.00385658	0.0132549	0.444552	0.656665	0.803193
L 6mp	0.0213936	0.0587828	1.9715	0.0487272	0.146434
L 6r	0.00681555	0.0284505	0.954195	0.340036	0.547299
L 6v	0.00807311	0.0579686	1.94419	0.0519341	0.153257
L 7AL	0.0152793	0.0594872	1.99513	0.0460889	0.140685
L 7Am	0.0117891	0.050474	1.69284	0.0905557	0.227343
L 7PC	0.00549428	0.0218931	0.734267	0.462824	0.658516
L 7PL	0.00816787	0.0527769	1.77007	0.0767825	0.202622
L 7Pm	0.00272972	0.0179595	0.602339	0.546979	0.725353
L 7m	-0.00508736	-0.0256516	-0.860325	0.389656	0.594538
L 8Ad	0.0126451	0.0427396	1.43343	0.151804	0.324094
L 8Av	0.00444993	0.0141094	0.473212	0.636085	0.789504
L 8BL	0.00648336	0.0321187	1.07722	0.281439	0.486305
L 8BM	-0.0109973	-0.0583476	-1.95691	0.0504198	0.150046
L 8C	0.0224726	0.077355	2.59439	0.00950645	0.0438116
L 9-46d	0.0320862	0.0743798	2.49461	0.0126451	0.054352
L 9a	0.0180147	0.0556465	1.86632	0.062062	0.174189
L 9m	0.00661738	0.0231675	0.777009	0.437194	0.636784
L 9p	0.0142702	0.0563945	1.8914	0.0586348	0.167227
L A1	-0.00680974	-0.0585563	-1.96391	0.0496021	0.1483
L A4	-0.00808174	-0.034858	-1.16909	0.242428	0.441902
L A5	-0.00555475	-0.0266234	-0.892916	0.37195	0.57821
L AAIC	-0.00240907	-0.0148174	-0.496958	0.619243	0.77823
L AIP	0.00405985	0.0151449	0.507942	0.611519	0.772701
L AVI	-0.00103268	-0.00742933	-0.249171	0.80324	0.89596
L DVT	-0.00259076	-0.0134891	-0.452409	0.650996	0.799622
L EC	0.00722456	0.0235447	0.789661	0.429767	0.630283
L FEF	0.0206255	0.103189	3.46084	0.000543479	0.004603
L FFC	0.0155157	0.0606854	2.03531	0.0418777	0.13135
L FOP1	0.00478882	0.0566888	1.90127	0.0573298	0.164491
L FOP2	-0.000601589	-0.00768441	-0.257726	0.79663	0.891792
L FOP3	0.00164032	0.0159647	0.535435	0.592376	0.75902
L FOP4	-0.00119823	-0.00812587	-0.272532	0.785226	0.885042
L FOP5	-0.00469502	-0.0425089	-1.4257	0.154025	0.327249
L FST	0.00252862	0.0129999	0.436	0.662858	0.807534
L H	0.0407693	0.131728	4.41798	1.0196e-05	0.000182794
L IFJa	0.00194281	0.0144913	0.486021	0.626976	0.783432
L IFJp	0.00351043	0.0284444	0.953989	0.34014	0.547378
L IFSa	-0.00946395	-0.0343806	-1.15308	0.248938	0.449512
L IFSp	-0.00156832	-0.00923503	-0.309732	0.756779	0.867906
L IP0	-0.00305663	-0.0203343	-0.681989	0.495281	0.685269
L IP1	0.00503429	0.0227188	0.761959	0.446124	0.644529
L IP2	0.00608929	0.0300618	1.00824	0.313395	0.520096
L IPS1	0.0027245	0.0168996	0.566792	0.570884	0.742814
L Ig	-0.00142071	-0.0129072	-0.432892	0.665114	0.809048
L LBelt	-0.000458065	-0.00384979	-0.129117	0.897271	0.948249
L LIPd	-0.00757294	-0.0523616	-1.75614	0.0791318	0.206883
L LIPv	-0.000816599	-0.00422922	-0.141843	0.887211	0.942834
L LO1	0.00182253	0.0130555	0.437867	0.661504	0.806585
L LO2	0.00593386	0.0401197	1.34557	0.17851	0.361147
L LO3	0.000848587	0.00548015	0.183797	0.854181	0.924451
L MBelt	-0.00302803	-0.0196992	-0.660688	0.508846	0.695985
L MIP	0.0142181	0.0846685	2.83968	0.00453614	0.0247327
L MI	0.00866576	0.0438564	1.47089	0.141391	0.309148
L MST	-0.00383706	-0.0290783	-0.975249	0.329489	0.536605
L MT	-0.000343872	-0.00285904	-0.0958888	0.923613	0.96194
L OFC	0.0328448	0.0821666	2.75577	0.00587898	0.030282
L OP1	-0.00559493	-0.0372614	-1.2497	0.211474	0.403983
L OP2-3	-0.00397382	-0.037304	-1.25113	0.210951	0.403354
L OP4	0.00380292	0.0233001	0.781456	0.434575	0.634405
L PBelt	-0.00554299	-0.035022	-1.1746	0.240218	0.439303
L PCV	0.0233159	0.104609	3.50846	0.000455103	0.00398924
L PEF	0.00312404	0.0247536	0.830204	0.406467	0.609751
L PF	0.000413639	0.000860087	0.0288463	0.976988	0.988824
L PFcm	0.000567383	0.00351551	0.117906	0.906148	0.952628
L PFm	0.0157948	0.026395	0.885256	0.376066	0.581908
L PFop	-0.000413862	-0.00215013	-0.0721128	0.942515	0.971319
L PFt	0.00174288	0.00695366	0.233217	0.815603	0.902987
L PGi	0.00176052	0.00436987	0.14656	0.883486	0.940632
L PGp	-0.00174214	-0.00693066	-0.232446	0.816202	0.903248
L PGs	0.00807454	0.0205217	0.688272	0.491317	0.682179
L PHA1	0.00574504	0.0371028	1.24438	0.213423	0.40642
L PHA2	0.0128574	0.107551	3.60713	0.000312958	0.00295446
L PHA3	0.0120446	0.0619496	2.07771	0.0377921	0.12202
L PHT	-0.0028183	-0.00860275	-0.288526	0.772958	0.877685
L PH	0.00402234	0.0136456	0.457657	0.647221	0.797267
L PIT	-0.00169679	-0.0115512	-0.387413	0.698469	0.831207
L PI	0.000545228	0.00549846	0.184412	0.853699	0.924126
L POS1	-0.021467	-0.102225	-3.42849	0.000612382	0.00507911
L POS2	0.0149663	0.0577333	1.9363	0.0528928	0.155346
L PSL	0.000837588	0.00357097	0.119766	0.904674	0.951989
L PeEc	0.0149939	0.0308739	1.03547	0.300504	0.506594
L Pir	0.00306405	0.0124243	0.416697	0.67692	0.816958
L PoI1	0.00226249	0.0103742	0.347939	0.727902	0.850189
L PoI2	0.00486287	0.0170882	0.573119	0.566593	0.739798
L PreS	0.00795072	0.0396875	1.33107	0.183234	0.367651
L ProS	-0.0267061	-0.082332	-2.76131	0.00578021	0.0298856
L RI	-0.00284658	-0.0183288	-0.614725	0.538768	0.718973
L RSC	0.0079564	0.0424992	1.42537	0.154119	0.327356
L SCEF	-0.00782753	-0.0335252	-1.1244	0.260905	0.463024
L SFL	0.00548097	0.0219618	0.736573	0.46142	0.657331
L STGa	0.00230926	0.0130215	0.436724	0.662333	0.807115
L STSda	-0.00224687	-0.0109359	-0.366776	0.713804	0.841102
L STSdp	-0.00464666	-0.0237834	-0.797667	0.425106	0.626096
L STSva	-0.000599064	-0.00306872	-0.102921	0.91803	0.959061
L STSvp	0.00231944	0.0106982	0.358806	0.719757	0.845087
L STV	-0.00264082	-0.0130579	-0.437947	0.661445	0.806536
L TA2	-0.000731127	-0.00597488	-0.20039	0.841184	0.917475
L TE1a	0.0020173	0.00669409	0.224512	0.822369	0.906658
L TE1m	0.00354215	0.0139614	0.46825	0.639629	0.791974
L TE1p	-0.0018645	-0.00455536	-0.152781	0.878578	0.937777
L TE2a	0.00994816	0.0209675	0.703225	0.481952	0.674527
L TE2p	0.00371476	0.0120169	0.403033	0.686943	0.823472
L TF	0.014519	0.036455	1.22266	0.221523	0.416477
L TGd	0.0067678	0.0117164	0.392955	0.694371	0.828509
L TGv	-0.00413438	-0.0124072	-0.416121	0.677341	0.817261
L TPOJ1	-0.000194019	-0.000998613	-0.0334923	0.973284	0.986918
L TPOJ2	0.00889053	0.0428488	1.4371	0.15076	0.322657
L TPOJ3	-0.00400649	-0.0247756	-0.830942	0.40605	0.609363
L V1	0.0139026	0.0105647	0.354325	0.723112	0.847358
L V2	0.0011731	0.00137374	0.0460735	0.963254	0.981794
L V3A	0.0190811	0.0716363	2.40259	0.0163194	0.06579
L V3B	0.00418178	0.0340967	1.14356	0.252866	0.454091
L V3CD	0.00133615	0.00813807	0.272941	0.784911	0.884847
L V3	0.0241568	0.0418734	1.40438	0.160273	0.335855
L V4	0.0166271	0.0390394	1.30933	0.190488	0.377055
L V4t	0.00368719	0.0304589	1.02156	0.307046	0.513517
L V6A	0.00259292	0.0216187	0.725066	0.468449	0.66315
L V6	0.00290364	0.0165457	0.554923	0.578975	0.748876
L V7	0.00411404	0.037203	1.24774	0.21219	0.404862
L V8	-0.00144798	-0.0106086	-0.355798	0.722008	0.846638
L VIP	0.0100809	0.0515183	1.72786	0.0840813	0.21579
L VMV1	0.0156166	0.0971679	3.25889	0.00112677	0.0082658
L VMV2	0.000402857	0.00363492	0.121911	0.902975	0.951207
L VMV3	-0.00437942	-0.0356747	-1.19649	0.231569	0.428671
L VVC	-0.00070683	-0.00353329	-0.118502	0.905675	0.952446
L a10p	0.00886704	0.038832	1.30238	0.192853	0.380219
L a24	0.00392694	0.020283	0.680267	0.49637	0.686124
L a24pr	0.00564809	0.0433155	1.45275	0.146363	0.31635
L a32pr	-0.00128472	-0.00812001	-0.272335	0.785377	0.885119
L a47r	0.0152689	0.0405491	1.35997	0.173908	0.354792
L a9-46v	0.0213085	0.0697344	2.33881	0.0193888	0.0748213
L d23ab	-0.00332832	-0.0255796	-0.85791	0.390988	0.59579
L d32	-0.00671081	-0.0352321	-1.18164	0.23741	0.435941
L i6-8	0.00582135	0.0345022	1.15716	0.247268	0.44756
L p10p	0.0217152	0.0860286	2.88529	0.00392904	0.0221304
L p24	0.0153118	0.0985764	3.30613	0.00095333	0.00724046
L p24pr	-0.00160966	-0.0119796	-0.401781	0.687865	0.824171
L p32	0.00566462	0.0334603	1.12222	0.261829	0.464039
L p32pr	0.000970929	0.00629908	0.211264	0.832691	0.912499
L p47r	0.00416022	0.0162249	0.544164	0.586356	0.754467
L p9-46v	0.00758584	0.0310556	1.04157	0.297668	0.503612
L pOFC	0.00570281	0.0194643	0.652807	0.513914	0.699843
L s32	-0.00493231	-0.0338384	-1.1349	0.256477	0.458268
L s6-8	0.00833372	0.0571737	1.91753	0.0552331	0.160128
L v23ab	-0.00778033	-0.0685639	-2.29955	0.0215192	0.0809368
R 10d	-0.000639778	-0.0026057	-0.0873919	0.930364	0.965385
R 10pp	0.00382919	0.0128007	0.429318	0.667712	0.810734
R 10r	0.00120136	0.00595739	0.199804	0.841643	0.917703
R 10v	0.00301125	0.0120355	0.403657	0.686484	0.823191
R 11l	0.0260554	0.0791736	2.65538	0.00794965	0.0382141
R 13l	0.00709216	0.0366674	1.22978	0.218843	0.41319
R 1	0.0144713	0.0289223	0.97002	0.332089	0.53921
R 23c	-0.00656206	-0.0336205	-1.12759	0.259553	0.461675
R 23d	-0.00179501	-0.0123401	-0.413873	0.678987	0.818297
R 24dd	0.00505747	0.0251042	0.841963	0.399853	0.603897
R 24dv	0.00482618	0.0310231	1.04048	0.298174	0.504159
R 25	-0.000156239	-0.00112333	-0.0376751	0.969948	0.985191
R 2	0.00995695	0.0222297	0.745558	0.455974	0.652914
R 31a	-0.00121191	-0.00893249	-0.299585	0.764508	0.872547
R 31pd	0.0091951	0.0621533	2.08454	0.0371667	0.120568
R 31pv	0.0032803	0.0215883	0.724044	0.469076	0.663678
R 33pr	0.000376962	0.00364238	0.122161	0.902777	0.951109
R 3a	-0.000979044	-0.00370982	-0.124423	0.900986	0.950264
R 3b	0.0120113	0.0320612	1.07529	0.282301	0.487271
R 43	-0.00395852	-0.0231659	-0.776957	0.437225	0.636818
R 44	0.00280388	0.0137254	0.460332	0.6453	0.796003
R 45	0.0033825	0.0175828	0.589705	0.555418	0.73172
R 46	0.027189	0.0655011	2.19683	0.0280834	0.0983729
R 47l	0.0152057	0.0747962	2.50857	0.0121568	0.0527432
R 47m	0.00715422	0.0518783	1.73993	0.0819389	0.211925
R 47s	0.00570971	0.0235348	0.789327	0.429962	0.630488
R 4	0.0332345	0.0394454	1.32295	0.185919	0.371106
R 52	0.00280143	0.0400823	1.34431	0.178916	0.361684
R 55b	0.0123197	0.0822145	2.75737	0.00585021	0.0301689
R 5L	0.010305	0.0550876	1.84757	0.0647297	0.179555
R 5m	0.00230645	0.0148009	0.496404	0.619634	0.778463
R 5mv	0.000638811	0.00377985	0.126772	0.899127	0.949182
R 6a	0.0303478	0.100313	3.36439	0.000773525	0.0061163
R 6d	0.0278258	0.087777	2.94393	0.00325724	0.0191049
R 6ma	0.00648742	0.0200319	0.671845	0.501717	0.690312
R 6mp	0.0165741	0.0489843	1.64287	0.100479	0.244468
R 6r	-0.00923549	-0.0342666	-1.14926	0.25051	0.451359
R 6v	-0.00618542	-0.0319558	-1.07176	0.283885	0.489168
R 7AL	0.00671263	0.0318278	1.06747	0.285819	0.491106
R 7Am	0.014005	0.0594885	1.99517	0.046084	0.140674
R 7PC	-0.00320086	-0.01248	-0.418564	0.675555	0.816069
R 7PL	0.00231671	0.0157361	0.527769	0.597685	0.762747
R 7Pm	0.00826903	0.0580933	1.94838	0.0514318	0.152152
R 7m	0.000108983	0.000540288	0.0181206	0.985543	0.993096
R 8Ad	0.0134066	0.0479264	1.60739	0.108038	0.257056
R 8Av	0.019788	0.0597226	2.00302	0.0452344	0.138844
R 8BL	0.022352	0.0747239	2.50615	0.0122404	0.0530392
R 8BM	-0.0124793	-0.0556526	-1.86652	0.0620336	0.17414
R 8C	0.00659756	0.024597	0.824953	0.409442	0.612365
R 9-46d	0.0611592	0.13434	4.50562	6.78538e-06	0.000130827
R 9a	0.0094993	0.0373627	1.2531	0.210235	0.402523
R 9m	0.00221535	0.00661416	0.221831	0.824456	0.908007
R 9p	0.0120726	0.0462986	1.5528	0.120541	0.277166
R A1	-0.00315008	-0.030459	-1.02156	0.307045	0.513517
R A4	-0.0085927	-0.040241	-1.34963	0.177201	0.359363
R A5	-0.00269578	-0.0115066	-0.385916	0.699577	0.831896
R AAIC	0.00540253	0.0305941	1.02609	0.304905	0.511214
R AIP	-0.00058372	-0.00213479	-0.0715984	0.942925	0.971538
R AVI	0.000290192	0.00176901	0.0593306	0.952691	0.976525
R DVT	0.00291992	0.0145465	0.487873	0.625664	0.782568
R EC	0.0031668	0.0116818	0.391792	0.695231	0.829022
R FEF	0.019237	0.0863519	2.89614	0.00379604	0.0215508
R FFC	-0.00654133	-0.0213998	-0.717724	0.472964	0.667043
R FOP1	0.00084527	0.00892704	0.299402	0.764647	0.872648
R FOP2	0.00192268	0.0226928	0.761089	0.446644	0.645058
R FOP3	-0.0020953	-0.0261683	-0.877651	0.38018	0.585778
R FOP4	0.00220339	0.0187958	0.630387	0.528474	0.711183
R FOP5	0.00215156	0.0176788	0.592925	0.553261	0.730221
R FST	0.00673409	0.0348219	1.16788	0.242915	0.442489
R H	0.0320446	0.127232	4.2672	2.01996e-05	0.000319306
R IFJa	-0.00470657	-0.0357812	-1.20006	0.230179	0.426983
R IFJp	-0.00285794	-0.0298343	-1.0006	0.317071	0.523893
R IFSa	0.00348405	0.0121286	0.406778	0.68419	0.8217
R IFSp	-0.00222808	-0.00987209	-0.331098	0.740586	0.858344
R IP0	-0.00221666	-0.0147203	-0.493702	0.621541	0.779745
R IP1	7.41732e-05	0.000299096	0.0100313	0.991997	0.996305
R IP2	-0.00210825	-0.00884441	-0.296631	0.766762	0.874009
R IPS1	0.00792623	0.045563	1.52813	0.126551	0.286573
R Ig	-0.00417515	-0.0440955	-1.47891	0.139234	0.306015
R LBelt	-0.00201841	-0.0173562	-0.582105	0.560525	0.735314
R LIPd	0.0043606	0.0312091	1.04671	0.295288	0.501213
R LIPv	0.00274967	0.0165476	0.554987	0.578931	0.748876
R LO1	-0.000125954	-0.000946195	-0.0317342	0.974685	0.98754
R LO2	0.00509129	0.0410996	1.37843	0.168139	0.346994
R LO3	-0.00700134	-0.0444754	-1.49165	0.135861	0.300786
R MBelt	0.00498255	0.0401789	1.34755	0.177871	0.360255
R MIP	0.0108137	0.0542513	1.81952	0.068898	0.18779
R MI	0.00639968	0.0383005	1.28455	0.199015	0.388277
R MST	0.0109028	0.0668957	2.2436	0.0249065	0.0900793
R MT	0.00818421	0.0580417	1.94665	0.0516389	0.152613
R OFC	0.0172224	0.0404436	1.35643	0.17503	0.35636
R OP1	-0.00222203	-0.0192365	-0.645169	0.518851	0.703616
R OP2-3	-0.00305751	-0.0331734	-1.1126	0.265941	0.468761
R OP4	-0.00525987	-0.0283009	-0.949177	0.342581	0.549979
R PBelt	0.00119019	0.0087488	0.293424	0.769212	0.875327
R PCV	0.0152709	0.070603	2.36794	0.0179295	0.0706036
R PEF	0.0054354	0.0340178	1.14092	0.253965	0.455359
R PF	0.00409982	0.0126569	0.424495	0.671225	0.813036
R PFcm	-0.00474835	-0.0332172	-1.11406	0.265311	0.468066
R PFm	-0.00348702	-0.00621551	-0.208461	0.834879	0.91381
R PFop	0.000268471	0.00146646	0.0491833	0.960775	0.980533
R PFt	0.00294981	0.0130057	0.436194	0.662717	0.807413
R PGi	0.00239921	0.00445328	0.149358	0.881278	0.939441
R PGp	-0.00318733	-0.00913711	-0.306448	0.759278	0.869271
R PGs	-0.0163053	-0.0436178	-1.46289	0.143568	0.312455
R PHA1	0.00554283	0.0430579	1.44411	0.148777	0.319784
R PHA2	0.00479357	0.0569305	1.90938	0.0562764	0.162269
R PHA3	0.00533658	0.0547037	1.83469	0.0666167	0.183298
R PHT	0.00160041	0.00507057	0.170061	0.86497	0.930466
R PH	-0.00269465	-0.00906464	-0.304017	0.761129	0.870299
R PIT	0.00399559	0.0228672	0.766939	0.443158	0.642002
R PI	0.00175077	0.0170474	0.57175	0.56752	0.740402
R POS1	-0.0131395	-0.0612672	-2.05483	0.039953	0.126928
R POS2	0.0149234	0.0528227	1.77161	0.0765271	0.202174
R PSL	0.00760511	0.0334291	1.12117	0.262275	0.464568
R PeEc	0.00547992	0.0141922	0.475989	0.634105	0.788059
R Pir	-0.0176417	-0.0545332	-1.82898	0.0674689	0.185042
R PoI1	-0.00483993	-0.0279076	-0.935988	0.34933	0.556551
R PoI2	-0.0052694	-0.0206512	-0.692617	0.488585	0.679928
R PreS	0.00443622	0.0282614	0.947852	0.343255	0.550687
R ProS	-0.0148688	-0.0662611	-2.22232	0.0263114	0.0937978
R RI	-0.000856931	-0.00650448	-0.218152	0.82732	0.909588
R RSC	0.00352201	0.019572	0.656422	0.511586	0.698009
R SCEF	-0.00460801	-0.0229581	-0.769988	0.441348	0.640363
R SFL	-0.00162284	-0.0081456	-0.273193	0.784717	0.884772
R STGa	0.00830118	0.0489199	1.64071	0.100926	0.245255
R STSda	-0.00570935	-0.0244198	-0.819009	0.412825	0.615273
R STSdp	-0.00273025	-0.0143068	-0.479833	0.63137	0.786402
R STSva	0.00469836	0.026478	0.888038	0.374567	0.580464
R STSvp	-0.00556958	-0.0311302	-1.04407	0.296509	0.502396
R STV	-0.00864002	-0.0368668	-1.23647	0.216349	0.410057
R TA2	-6.36681e-05	-0.000407969	-0.0136828	0.989084	0.994901
R TE1a	0.00901163	0.0369195	1.23823	0.215694	0.409256
R TE1m	0.00267595	0.0114678	0.384617	0.700539	0.832477
R TE1p	-0.000353116	-0.000835331	-0.028016	0.977651	0.989155
R TE2a	0.00336912	0.00714458	0.23962	0.810635	0.900202
R TE2p	0.00443421	0.0133424	0.447489	0.654543	0.801781
R TF	0.00828954	0.0216881	0.727391	0.467024	0.661872
R TGd	-0.0186622	-0.0336252	-1.12775	0.259486	0.461606
R TGv	0.00705588	0.0199121	0.667826	0.504279	0.692374
R TPOJ1	-0.00122635	-0.00389158	-0.130519	0.896162	0.947681
R TPOJ2	0.00203921	0.0087662	0.294008	0.768766	0.875072
R TPOJ3	-0.000381286	-0.00199024	-0.0667503	0.946783	0.97349
R V1	-0.0344823	-0.0243402	-0.816342	0.414348	0.616673
R V2	-0.00483892	-0.00539709	-0.181012	0.856366	0.925593
R V3A	0.00800046	0.0282551	0.947641	0.343363	0.550762
R V3B	0.0053936	0.044922	1.50663	0.131976	0.294942
R V3CD	-0.00304535	-0.0186748	-0.62633	0.53113	0.713149
R V3	0.0263724	0.0443552	1.48762	0.136921	0.302434
R V4	0.0179502	0.046361	1.55489	0.120042	0.276366
R V4t	0.00310138	0.0262343	0.879867	0.378978	0.584725
R V6A	0.00568833	0.045546	1.52756	0.126693	0.286732
R V6	-0.000127971	-0.00066795	-0.0224022	0.982128	0.99157
R V7	0.00780568	0.060331	2.02343	0.0430878	0.134124
R V8	0.0019054	0.0125711	0.421621	0.673322	0.814593
R VIP	0.00627748	0.0407688	1.36734	0.171588	0.351677
R VMV1	0.00207767	0.0116545	0.390877	0.695907	0.829457
R VMV2	0.00362338	0.0274585	0.920925	0.357139	0.56414
R VMV3	0.000930536	0.00727437	0.243973	0.807263	0.898264
R VVC	0.00628182	0.0326016	1.09342	0.274269	0.478177
R a10p	0.00246558	0.0104088	0.349098	0.727032	0.849666
R a24	0.00224216	0.0131086	0.439647	0.660214	0.805769
R a24pr	-0.00316913	-0.025208	-0.845445	0.397907	0.602081
R a32pr	-0.00328083	-0.0227685	-0.763626	0.44513	0.643719
R a47r	0.0353178	0.093117	3.12303	0.00180133	0.0120018
R a9-46v	0.0248715	0.0959267	3.21726	0.00130334	0.0092725
R d23ab	-0.00912825	-0.0859047	-2.88114	0.00398112	0.0223551
R d32	-0.00346544	-0.017081	-0.572877	0.566757	0.739899
R i6-8	0.00411333	0.026113	0.875799	0.381186	0.586731
R p10p	0.00017982	0.000668177	0.0224098	0.982122	0.99157
R p24	-0.00156487	-0.0104566	-0.3507	0.72583	0.848901
R p24pr	-0.0047685	-0.030692	-1.02937	0.303359	0.509681
R p32	-0.00919095	-0.0483086	-1.62021	0.105257	0.252497
R p32pr	0.00482033	0.0297599	0.99811	0.318279	0.525096
R p47r	0.00885742	0.0371031	1.24439	0.21342	0.40642
R p9-46v	0.001369	0.00419097	0.14056	0.888224	0.943406
R pOFC	0.0094475	0.0310548	1.04154	0.297681	0.503629
R s32	-0.00357833	-0.0251795	-0.84449	0.39844	0.602565
R s6-8	0.00109929	0.00635321	0.213079	0.831275	0.911804
R v23ab	-0.00457899	-0.0403576	-1.35355	0.175949	0.357649

## Sheet: Table S11
Table S13: Results of linear regression models comparing cortical mean curvature in regions defined by the HCP-MMP parcellation between all OCD cases and controls
Region	Beta	Cohen's D	T-statistic	P-value	P-value (FDR)
L 10d	-0.00023028	-0.0175891	-0.589918	0.555275	0.731628
L 10pp	0.000433209	0.026067	0.874254	0.382026	0.58761
L 10r	-0.000126567	-0.00551405	-0.184935	0.853289	0.923924
L 10v	-0.000389393	-0.0246614	-0.827114	0.408216	0.611288
L 11l	-0.000280825	-0.0211652	-0.709854	0.477831	0.670948
L 13l	0.00101283	0.0732916	2.45811	0.0140043	0.0586496
L 1	-0.000582601	-0.0544013	-1.82455	0.0681347	0.186287
L 23c	-0.000586984	-0.0473473	-1.58797	0.112363	0.264106
L 23d	-0.000727523	-0.0372569	-1.24955	0.211528	0.404049
L 24dd	-0.000175495	-0.0169463	-0.56836	0.569819	0.74205
L 24dv	0.00066684	0.0427262	1.43298	0.151932	0.324283
L 25	-9.00094e-06	-0.000456568	-0.0153127	0.987783	0.994267
L 2	-0.000283801	-0.0291884	-0.978944	0.32766	0.534747
L 31a	-0.000725532	-0.0328457	-1.1016	0.270693	0.474077
L 31pd	0.000372652	0.0251759	0.84437	0.398508	0.602619
L 31pv	-0.000763974	-0.0538899	-1.8074	0.0707662	0.191311
L 33pr	0.00186082	0.0758379	2.54351	0.0110075	0.0489474
L 3a	0.000244583	0.0241558	0.810157	0.417893	0.619673
L 3b	-0.000310132	-0.0314335	-1.05424	0.291829	0.497574
L 43	-0.000582789	-0.035877	-1.20327	0.228934	0.425515
L 44	0.00140766	0.0971013	3.25666	0.00113565	0.00831859
L 45	0.000505675	0.0426266	1.42965	0.152888	0.325632
L 46	-8.27467e-05	-0.00623052	-0.208964	0.834486	0.9136
L 47l	0.000183034	0.0131754	0.441888	0.658592	0.804609
L 47m	-0.000895471	-0.044586	-1.49536	0.13489	0.299358
L 47s	0.00115926	0.0761938	2.55545	0.0106377	0.0477333
L 4	0.000736281	0.0646615	2.16867	0.03016	0.103512
L 52	7.3183e-05	0.00602453	0.202056	0.839882	0.916722
L 55b	-0.000329404	-0.0233335	-0.782576	0.433917	0.633825
L 5L	0.00130163	0.109904	3.68604	0.000230446	0.00230225
L 5m	0.000467652	0.0267937	0.898628	0.368899	0.575221
L 5mv	-0.000578189	-0.0399336	-1.33933	0.180532	0.363925
L 6a	0.000292761	0.0310918	1.04278	0.297106	0.503107
L 6d	-5.2013e-05	-0.00354226	-0.118803	0.905437	0.952335
L 6ma	0.000229528	0.0181453	0.608571	0.54284	0.722106
L 6mp	0.000240765	0.0199318	0.668489	0.503856	0.692077
L 6r	0.000312251	0.0258339	0.866437	0.386297	0.591389
L 6v	-0.000109502	-0.00705089	-0.236478	0.813072	0.901574
L 7AL	0.000754705	0.0462282	1.55044	0.121107	0.27805
L 7Am	-0.000559846	-0.0334977	-1.12347	0.261297	0.463398
L 7PC	-0.000523649	-0.0380168	-1.27504	0.202362	0.392489
L 7PL	0.000578373	0.0326372	1.09461	0.273746	0.477576
L 7Pm	0.000271273	0.0134016	0.449472	0.653113	0.800898
L 7m	-0.000506544	-0.0312083	-1.04669	0.2953	0.501228
L 8Ad	0.000109543	0.00885544	0.297001	0.76648	0.873785
L 8Av	-0.000337598	-0.0284672	-0.954755	0.339753	0.547001
L 8BL	-9.7835e-05	-0.00705743	-0.236697	0.812902	0.901463
L 8BM	-0.000465602	-0.0372836	-1.25045	0.211201	0.403651
L 8C	0.00074859	0.0703654	2.35997	0.0183188	0.071761
L 9-46d	0.000461674	0.0405877	1.36126	0.173499	0.354239
L 9a	-6.19676e-05	-0.00473894	-0.158938	0.873725	0.934979
L 9m	0.000672014	0.0647995	2.17329	0.02981	0.102657
L 9p	-9.40935e-05	-0.0066694	-0.223684	0.823014	0.907091
L A1	-0.000380698	-0.0201079	-0.674396	0.500094	0.689173
L A4	-0.000796599	-0.0579163	-1.94244	0.0521457	0.153706
L A5	-0.000562436	-0.0382701	-1.28353	0.199371	0.388683
L AAIC	-0.000436259	-0.0205697	-0.689882	0.490304	0.681357
L AIP	-0.000369726	-0.0285052	-0.956031	0.339108	0.546345
L AVI	-0.000145443	-0.011566	-0.387909	0.698102	0.830952
L DVT	-0.000900709	-0.0602839	-2.02185	0.043251	0.134474
L EC	5.89124e-06	0.000339345	0.0113812	0.99092	0.995813
L FEF	0.000821378	0.0628541	2.10805	0.0350818	0.115628
L FFC	0.000584186	0.0427604	1.43413	0.151604	0.323802
L FOP1	0.000132554	0.00683534	0.229249	0.818686	0.904644
L FOP2	-0.000131638	-0.00854376	-0.286547	0.774472	0.878613
L FOP3	0.000697621	0.0517871	1.73688	0.0824773	0.212858
L FOP4	0.000164513	0.0141313	0.473947	0.63556	0.789083
L FOP5	-0.000308875	-0.0276322	-0.926751	0.354105	0.561205
L FST	-4.00579e-05	-0.00223425	-0.074934	0.940271	0.970112
L H	0.00216688	0.148566	4.98271	6.50438e-07	1.98883e-05
L IFJa	-0.00027603	-0.0202461	-0.679028	0.497155	0.686757
L IFJp	-0.000261273	-0.017622	-0.591021	0.554536	0.731128
L IFSa	-0.00019503	-0.0135568	-0.45468	0.649361	0.798541
L IFSp	-0.000132261	-0.00767322	-0.25735	0.79692	0.891961
L IP0	-0.000261562	-0.0187782	-0.629797	0.528859	0.71141
L IP1	6.1778e-05	0.00469543	0.157479	0.874874	0.935729
L IP2	0.000603148	0.0444342	1.49027	0.136224	0.301348
L IPS1	-0.000451739	-0.0239957	-0.804787	0.420985	0.622431
L Ig	-0.000521173	-0.0351502	-1.17889	0.238503	0.43726
L LBelt	-0.000413723	-0.0275261	-0.923193	0.355956	0.563011
L LIPd	-0.00101423	-0.0663567	-2.22552	0.0260953	0.0932492
L LIPv	-1.25662e-05	-0.00066194	-0.0222007	0.982289	0.991612
L LO1	0.000759213	0.0394292	1.32241	0.1861	0.371337
L LO2	0.000383409	0.0217232	0.728569	0.466303	0.661278
L LO3	0.000853234	0.0415661	1.39408	0.163363	0.340233
L MBelt	0.000114371	0.00547411	0.183595	0.85434	0.924501
L MIP	0.000659613	0.0467409	1.56763	0.117037	0.271511
L MI	0.00113894	0.0649433	2.17812	0.0294487	0.101763
L MST	-0.000181238	-0.0102837	-0.344902	0.730184	0.851569
L MT	3.77161e-05	0.00192304	0.0644965	0.948578	0.974452
L OFC	0.00138264	0.118668	3.97999	6.99998e-05	0.000875754
L OP1	8.81746e-07	5.4034e-05	0.00181223	0.998554	0.999359
L OP2-3	-0.000755534	-0.054624	-1.83202	0.0670141	0.184101
L OP4	0.000584674	0.0430221	1.44291	0.149115	0.320274
L PBelt	-0.000898485	-0.0560909	-1.88122	0.0600065	0.170042
L PCV	0.00141516	0.0831825	2.78984	0.00529555	0.0279101
L PEF	0.000317035	0.0157617	0.528629	0.597089	0.762382
L PF	2.22424e-05	0.00201899	0.0677145	0.946016	0.973107
L PFcm	0.00037465	0.0265333	0.889895	0.37357	0.579569
L PFm	9.82617e-05	0.00963135	0.323024	0.746692	0.862013
L PFop	-0.000672392	-0.0473972	-1.58964	0.111985	0.263504
L PFt	0.000114296	0.00898328	0.301288	0.763209	0.871641
L PGi	-9.6147e-05	-0.00819662	-0.274905	0.783402	0.88401
L PGp	4.67475e-05	0.00318061	0.106674	0.915053	0.95744
L PGs	0.000466077	0.0399346	1.33936	0.180522	0.363913
L PHA1	0.000580326	0.0282484	0.947416	0.343478	0.550895
L PHA2	0.00182365	0.100469	3.3696	0.000759088	0.00602618
L PHA3	0.00130137	0.0776747	2.60512	0.00921448	0.0428057
L PHT	1.3737e-05	0.000877811	0.0294407	0.976514	0.988575
L PH	-9.71688e-05	-0.0066878	-0.224301	0.822533	0.906764
L PIT	-0.0001071	-0.00586739	-0.196785	0.844005	0.919053
L PI	-0.000108869	-0.00842617	-0.282604	0.777494	0.880402
L POS1	-0.00106661	-0.0778189	-2.60995	0.00908541	0.0423521
L POS2	0.000389573	0.030477	1.02216	0.306759	0.513196
L PSL	0.000523854	0.0318215	1.06726	0.285913	0.49117
L PeEc	0.000557585	0.031766	1.06539	0.286755	0.492083
L Pir	0.000364529	0.0163597	0.548683	0.58325	0.752183
L PoI1	-5.20069e-05	-0.00286019	-0.0959272	0.923583	0.961927
L PoI2	-0.00050537	-0.0277158	-0.929556	0.352651	0.559676
L PreS	-0.000730251	-0.0549213	-1.84199	0.0655415	0.181213
L ProS	-0.00171331	-0.0656511	-2.20186	0.0277258	0.0974925
L RI	0.000249224	0.0201371	0.675374	0.499473	0.688718
L RSC	0.00105379	0.0683651	2.29288	0.0219005	0.0819282
L SCEF	-5.82449e-05	-0.00538285	-0.180534	0.856741	0.925794
L SFL	0.000225933	0.0161325	0.541064	0.58849	0.756149
L STGa	-0.000158249	-0.00793312	-0.266067	0.7902	0.887974
L STSda	-0.000953149	-0.0488514	-1.63841	0.101405	0.246019
L STSdp	-0.000251213	-0.0161781	-0.542594	0.587436	0.755255
L STSva	-0.000609574	-0.0409444	-1.37323	0.16975	0.3492
L STSvp	0.000193488	0.0132142	0.443187	0.657651	0.803893
L STV	-0.000569076	-0.0326139	-1.09383	0.274087	0.477971
L TA2	-0.000393893	-0.0162696	-0.545664	0.585324	0.753668
L TE1a	0.000141428	0.00974041	0.326681	0.743924	0.860271
L TE1m	-0.000187418	-0.0123247	-0.413356	0.679365	0.818523
L TE1p	-0.000341467	-0.0259003	-0.868664	0.385077	0.590326
L TE2a	0.000702216	0.0555413	1.86279	0.062557	0.175136
L TE2p	9.94e-05	0.00629627	0.211169	0.832765	0.912533
L TF	0.000664479	0.0433785	1.45486	0.145777	0.315605
L TGd	0.000157241	0.0126486	0.42422	0.671426	0.813217
L TGv	-0.000110398	-0.00661599	-0.221892	0.824408	0.907989
L TPOJ1	-0.000240796	-0.0146288	-0.490632	0.62371	0.781128
L TPOJ2	-0.000116122	-0.00708634	-0.237667	0.81215	0.900985
L TPOJ3	-0.000170747	-0.00785743	-0.263529	0.792155	0.889033
L V1	-0.00018192	-0.0198082	-0.664344	0.506504	0.694043
L V2	-0.000355742	-0.0452596	-1.51795	0.129097	0.290446
L V3A	0.000543661	0.0406144	1.36216	0.173216	0.353882
L V3B	6.49413e-06	0.00044782	0.0150193	0.988017	0.994352
L V3CD	-0.000240925	-0.0130917	-0.43908	0.660624	0.806032
L V3	-6.20151e-06	-0.000750252	-0.0251625	0.979926	0.99045
L V4	0.000103834	0.0115712	0.388083	0.697973	0.830881
L V4t	0.000643661	0.0320773	1.07583	0.282059	0.487012
L V6A	0.000420523	0.0222583	0.746518	0.455394	0.652412
L V6	-5.41011e-05	-0.00349537	-0.11723	0.906683	0.952855
L V7	9.89517e-05	0.0045627	0.153027	0.878384	0.937657
L V8	-0.000269229	-0.0154659	-0.518707	0.603991	0.767156
L VIP	0.000657035	0.0365423	1.22559	0.220419	0.415107
L VMV1	0.0016664	0.0746031	2.5021	0.0123811	0.0535133
L VMV2	-0.000925318	-0.047327	-1.58729	0.112517	0.264373
L VMV3	-0.000856886	-0.044573	-1.49492	0.135005	0.299514
L VVC	0.000718218	0.048152	1.61496	0.10639	0.254387
L a10p	0.00049266	0.0316297	1.06082	0.288827	0.494297
L a24	0.000808817	0.0371956	1.2475	0.212281	0.404988
L a24pr	0.00163004	0.0680045	2.28079	0.0226075	0.0839323
L a32pr	0.000392842	0.0234281	0.785749	0.432056	0.632236
L a47r	0.000337242	0.023759	0.796847	0.425582	0.62655
L a9-46v	0.00095505	0.0671721	2.25287	0.0243151	0.0885233
L d23ab	-0.000410908	-0.024473	-0.820795	0.411806	0.614403
L d32	-0.000446273	-0.0303873	-1.01915	0.308185	0.514743
L i6-8	0.000551782	0.0387661	1.30017	0.19361	0.381249
L p10p	0.000401641	0.0272847	0.915095	0.360191	0.566971
L p24	0.00290986	0.116689	3.9136	9.22687e-05	0.00109346
L p24pr	0.0003513	0.0173114	0.580605	0.561536	0.736063
L p32	0.0012129	0.0571877	1.91801	0.0551731	0.160033
L p32pr	0.000616601	0.0447487	1.50082	0.133473	0.297322
L p47r	9.14081e-05	0.00615654	0.206483	0.836423	0.914781
L p9-46v	-0.000267122	-0.0199705	-0.669785	0.503029	0.691412
L pOFC	0.00143518	0.0898244	3.0126	0.00260458	0.0160414
L s32	-0.00103694	-0.0380659	-1.27669	0.201779	0.391755
L s6-8	0.00147826	0.0720127	2.41522	0.0157654	0.0640992
L v23ab	-0.000703859	-0.0388191	-1.30195	0.193001	0.380394
R 10d	-0.00048196	-0.0339933	-1.14009	0.254308	0.455779
R 10pp	1.27399e-05	0.000855333	0.0286868	0.977116	0.988902
R 10r	0.000307382	0.0139402	0.467538	0.640137	0.792354
R 10v	-0.000340115	-0.0201531	-0.67591	0.499132	0.688452
R 11l	0.000518702	0.0421343	1.41313	0.157686	0.332313
R 13l	0.000479752	0.0303854	1.01909	0.308215	0.514773
R 1	0.000648474	0.0585176	1.96261	0.0497528	0.148641
R 23c	-0.000295186	-0.024365	-0.817171	0.413874	0.616231
R 23d	0.000255683	0.0139407	0.467552	0.640127	0.792352
R 24dd	7.18914e-05	0.00701736	0.235354	0.813945	0.90204
R 24dv	0.000396254	0.0291722	0.9784	0.327929	0.535039
R 25	-0.000479059	-0.0223239	-0.748716	0.454068	0.651289
R 2	0.000457431	0.0430274	1.44309	0.149066	0.320203
R 31a	-0.0010053	-0.0427265	-1.433	0.151928	0.324283
R 31pd	0.000528032	0.0311445	1.04455	0.296288	0.502182
R 31pv	-0.000289997	-0.0190155	-0.637758	0.523664	0.707392
R 33pr	0.000958891	0.0399734	1.34066	0.180099	0.363322
R 3a	-0.000320136	-0.0312078	-1.04667	0.295308	0.501233
R 3b	0.000429055	0.0405377	1.35959	0.174029	0.354971
R 43	-9.85874e-05	-0.00709402	-0.237925	0.81195	0.900889
R 44	0.00055987	0.0376958	1.26427	0.206198	0.397271
R 45	0.000442484	0.0298699	1.0018	0.316494	0.523241
R 46	-3.20716e-05	-0.00264515	-0.0887153	0.929312	0.964859
R 47l	0.00126546	0.0885128	2.96861	0.0030072	0.0179508
R 47m	0.00107483	0.0525007	1.76081	0.0783383	0.205424
R 47s	1.84707e-05	0.00123837	0.0415334	0.966873	0.983536
R 4	0.000358459	0.0312319	1.04748	0.294934	0.500858
R 52	0.000217444	0.0152302	0.510801	0.609515	0.771182
R 55b	0.00104145	0.0617236	2.07013	0.0384966	0.123594
R 5L	0.000372598	0.0297955	0.999303	0.317701	0.524544
R 5m	3.6138e-05	0.0023397	0.0784708	0.937457	0.968663
R 5mv	1.008e-05	0.000704706	0.023635	0.981145	0.991019
R 6a	0.00104671	0.106426	3.56941	0.000361503	0.00331815
R 6d	0.000921268	0.0620372	2.08065	0.0375219	0.121394
R 6ma	0.000170469	0.0136107	0.456485	0.648063	0.797794
R 6mp	0.000404882	0.0356819	1.19673	0.231476	0.428565
R 6r	3.44784e-05	0.00317486	0.106481	0.915205	0.957513
R 6v	-0.000804891	-0.0582895	-1.95496	0.0506496	0.150514
R 7AL	0.000126202	0.00788094	0.264317	0.791548	0.888722
R 7Am	0.000554565	0.033587	1.12647	0.260027	0.462129
R 7PC	-0.000269793	-0.0185831	-0.623254	0.533149	0.714527
R 7PL	8.23523e-05	0.00423032	0.14188	0.887181	0.942823
R 7Pm	0.000137015	0.00659881	0.221316	0.824856	0.908223
R 7m	0.000267902	0.0175018	0.586988	0.557241	0.733051
R 8Ad	2.17498e-05	0.00178337	0.0598122	0.952308	0.976337
R 8Av	0.000200716	0.0164822	0.552792	0.580433	0.749995
R 8BL	0.000601968	0.0490724	1.64583	0.0998686	0.243504
R 8BM	-0.000640008	-0.0537942	-1.80419	0.0712679	0.192254
R 8C	0.000290808	0.0265245	0.889598	0.373729	0.579732
R 9-46d	0.00111468	0.0994387	3.33505	0.000859715	0.00665955
R 9a	-0.000232452	-0.0156351	-0.524383	0.600038	0.764472
R 9m	-4.06105e-05	-0.00430083	-0.144245	0.885314	0.941767
R 9p	-0.00049273	-0.0323561	-1.08519	0.277898	0.4823
R A1	-0.000601315	-0.0259365	-0.869879	0.384413	0.589699
R A4	-0.000756836	-0.0561257	-1.88239	0.0598478	0.169713
R A5	-0.000351614	-0.026374	-0.884552	0.376445	0.582302
R AAIC	0.00066532	0.0351175	1.1778	0.238939	0.437795
R AIP	-0.000187573	-0.0136544	-0.457953	0.647008	0.797129
R AVI	0.000175679	0.0140473	0.471131	0.63757	0.790577
R DVT	-0.000470781	-0.0353215	-1.18464	0.236223	0.434581
R EC	0.000378056	0.0197751	0.663233	0.507215	0.694647
R FEF	0.000120337	0.00873948	0.293112	0.76945	0.875508
R FFC	0.000332088	0.0258135	0.865754	0.386671	0.591767
R FOP1	0.000583181	0.030026	1.00704	0.313972	0.520632
R FOP2	0.000558514	0.0377659	1.26662	0.205356	0.396212
R FOP3	-8.44233e-05	-0.00678687	-0.227623	0.819949	0.905344
R FOP4	0.000813269	0.0630232	2.11372	0.0345939	0.11442
R FOP5	0.000210376	0.0203091	0.681143	0.495816	0.685753
R FST	9.55931e-05	0.00505466	0.169527	0.86539	0.930645
R H	0.00213582	0.145641	4.88461	1.07222e-06	2.95265e-05
R IFJa	-0.000449919	-0.0266841	-0.894952	0.37086	0.577093
R IFJp	-0.000402278	-0.0280126	-0.93951	0.347519	0.554814
R IFSa	-4.48207e-05	-0.0030288	-0.101582	0.919093	0.95959
R IFSp	0.000202473	0.0127165	0.426495	0.669767	0.811966
R IP0	0.000197856	0.0129757	0.435189	0.663446	0.807931
R IP1	0.000485306	0.0352321	1.18164	0.23741	0.435941
R IP2	0.000316119	0.0221412	0.74259	0.457769	0.654416
R IPS1	0.000995654	0.0560049	1.87834	0.0603995	0.170883
R Ig	-0.000337228	-0.0226694	-0.760303	0.447113	0.645455
R LBelt	-0.000361371	-0.018054	-0.60551	0.544871	0.723677
R LIPd	0.00110045	0.0606647	2.03462	0.0419475	0.131514
R LIPv	0.000817267	0.0433238	1.45303	0.146286	0.316262
R LO1	0.000527392	0.0256392	0.859907	0.389886	0.594689
R LO2	0.000717701	0.0364796	1.22348	0.221211	0.416082
R LO3	-0.000695499	-0.0339247	-1.13779	0.255267	0.456871
R MBelt	0.000332593	0.0167312	0.561144	0.574727	0.745821
R MIP	0.000338775	0.0233622	0.783539	0.433352	0.633354
R MI	0.0013743	0.072844	2.4431	0.0145999	0.0604514
R MST	0.00089945	0.0554913	1.86111	0.0627938	0.175622
R MT	0.00120272	0.0637645	2.13858	0.032523	0.109376
R OFC	0.0010176	0.0835032	2.80059	0.00512257	0.0271962
R OP1	-0.000244162	-0.0122862	-0.412063	0.680313	0.819133
R OP2-3	-0.000513456	-0.0349514	-1.17223	0.241168	0.440419
R OP4	-0.000308888	-0.0241346	-0.809445	0.418302	0.620025
R PBelt	-5.21778e-06	-0.000277882	-0.00931981	0.992564	0.996533
R PCV	0.00102749	0.0625459	2.09771	0.0359861	0.117738
R PEF	0.000762324	0.0427512	1.43382	0.151692	0.323916
R PF	0.000339109	0.0284093	0.952815	0.340735	0.54802
R PFcm	-0.000399374	-0.0284014	-0.952549	0.34087	0.548157
R PFm	0.000410235	0.0405314	1.35937	0.174097	0.355084
R PFop	0.000210369	0.0115073	0.385942	0.699558	0.831895
R PFt	0.000583547	0.0380317	1.27554	0.202184	0.39224
R PGi	0.000440434	0.0374823	1.25711	0.208779	0.400714
R PGp	0.000170214	0.0123267	0.413423	0.679316	0.818488
R PGs	-0.000378526	-0.0303168	-1.01679	0.309309	0.515951
R PHA1	0.000866167	0.0456512	1.53108	0.125819	0.28545
R PHA2	0.00111234	0.0746927	2.5051	0.0122766	0.0531563
R PHA3	0.00101322	0.0753701	2.52782	0.0115111	0.050601
R PHT	0.000147991	0.00949024	0.318291	0.750279	0.864133
R PH	0.000114584	0.0075239	0.252343	0.800788	0.89441
R PIT	0.000310264	0.0190064	0.63745	0.523864	0.707568
R PI	0.000219256	0.0174595	0.58557	0.558194	0.733622
R POS1	-0.000802486	-0.0560426	-1.8796	0.060227	0.170489
R POS2	0.000115651	0.00954569	0.320151	0.748869	0.863316
R PSL	0.00073151	0.0441979	1.48234	0.138318	0.304588
R PeEc	-6.54122e-05	-0.00412066	-0.138202	0.890087	0.944362
R Pir	-0.000438083	-0.0198622	-0.666155	0.505346	0.693125
R PoI1	-0.000747162	-0.0462675	-1.55175	0.120791	0.277555
R PoI2	-0.000938459	-0.0517092	-1.73426	0.0829395	0.213747
R PreS	-0.00100834	-0.0620281	-2.08035	0.0375499	0.121457
R ProS	-0.000806107	-0.0382122	-1.28159	0.200052	0.389497
R RI	-6.74758e-06	-0.00055353	-0.0185647	0.985189	0.992901
R RSC	-0.000227041	-0.0154725	-0.518928	0.603837	0.767052
R SCEF	-0.00042724	-0.036359	-1.21944	0.222743	0.418023
R SFL	-0.000463989	-0.0287592	-0.964547	0.334823	0.541942
R STGa	0.000704469	0.0338323	1.13469	0.256564	0.458337
R STSda	-0.000754885	-0.041349	-1.38679	0.165573	0.343457
R STSdp	1.08716e-05	0.000936208	0.0313993	0.974953	0.98765
R STSva	0.000147812	0.00938275	0.314686	0.753015	0.865712
R STSvp	-0.000973881	-0.0652949	-2.18991	0.0285816	0.0996373
R STV	-0.000408008	-0.0237845	-0.797703	0.425085	0.62609
R TA2	-9.41689e-05	-0.00406885	-0.136464	0.89146	0.945218
R TE1a	0.000357369	0.0235174	0.788744	0.430303	0.630773
R TE1m	6.90548e-05	0.00455489	0.152765	0.87859	0.93778
R TE1p	-1.79537e-05	-0.00142377	-0.0477514	0.961916	0.981115
R TE2a	0.000279776	0.0233131	0.781893	0.434319	0.634192
R TE2p	0.000509717	0.0314765	1.05568	0.291169	0.496886
R TF	0.000629606	0.0443686	1.48807	0.136802	0.302265
R TGd	-0.000213288	-0.0184912	-0.620171	0.535176	0.71623
R TGv	0.000439415	0.027988	0.938682	0.347944	0.555256
R TPOJ1	-6.4437e-05	-0.00504408	-0.169172	0.865669	0.930805
R TPOJ2	-0.00042693	-0.0256244	-0.859412	0.390159	0.59497
R TPOJ3	-0.000590628	-0.0343839	-1.1532	0.248891	0.449464
R V1	-0.000445958	-0.0494882	-1.65977	0.0970298	0.238587
R V2	-0.000406894	-0.0505049	-1.69387	0.0903584	0.227007
R V3A	0.000114423	0.00906558	0.304049	0.761105	0.870293
R V3B	0.00075675	0.054999	1.8446	0.0651612	0.180469
R V3CD	-0.000919996	-0.0533032	-1.78772	0.0738875	0.197153
R V3	0.000275064	0.032418	1.08726	0.276979	0.481322
R V4	0.000251049	0.0267873	0.898414	0.369013	0.575334
R V4t	0.000221367	0.0108295	0.36321	0.716465	0.842896
R V6A	-0.000236581	-0.0130236	-0.436797	0.662279	0.807097
R V6	-0.000955625	-0.0664032	-2.22708	0.025991	0.092989
R V7	0.0012053	0.0571645	1.91723	0.055272	0.160197
R V8	-0.000178356	-0.0115726	-0.388132	0.697937	0.830855
R VIP	0.00104301	0.0535506	1.79602	0.072558	0.194712
R VMV1	-0.000541144	-0.0266855	-0.894998	0.370836	0.577076
R VMV2	0.000460954	0.0217648	0.729964	0.46545	0.660644
R VMV3	0.000450527	0.02565	0.86027	0.389686	0.594563
R VVC	0.000821923	0.0556477	1.86636	0.0620565	0.174184
R a10p	-0.000381395	-0.0218738	-0.733622	0.463217	0.658852
R a24	0.00071967	0.0340036	1.14044	0.254164	0.455607
R a24pr	0.00051402	0.0224857	0.754143	0.450803	0.648427
R a32pr	-0.000216818	-0.0134101	-0.449757	0.652907	0.800799
R a47r	0.000681113	0.051992	1.74375	0.0812713	0.210763
R a9-46v	0.000914073	0.0564096	1.89191	0.0585672	0.167101
R d23ab	-0.00199526	-0.100505	-3.3708	0.000755799	0.00600504
R d32	9.40198e-05	0.00678987	0.227724	0.819871	0.905293
R i6-8	-0.000106573	-0.00697924	-0.234075	0.814937	0.902589
R p10p	-0.000275107	-0.0195991	-0.657331	0.511002	0.697538
R p24	-0.000280168	-0.0128574	-0.431222	0.666327	0.809896
R p24pr	-0.000543557	-0.0305493	-1.02459	0.305613	0.511933
R p32	-0.000796421	-0.0414824	-1.39127	0.164212	0.34147
R p32pr	0.00069174	0.0505321	1.69479	0.090185	0.226736
R p47r	-1.97489e-05	-0.00115838	-0.0388505	0.969011	0.98458
R p9-46v	8.61694e-05	0.00681091	0.22843	0.819323	0.905
R pOFC	0.00123848	0.0791041	2.65306	0.00800463	0.038417
R s32	-0.00033639	-0.0142212	-0.476961	0.633413	0.78765
R s6-8	0.000351432	0.0217838	0.730601	0.465061	0.660356
R v23ab	4.76801e-05	0.00290394	0.0973946	0.922417	0.961356

## Sheet: Table S12
Table S14: Results of linear regression models comparing cortical sulcal depth in regions defined by the HCP-MMP parcellation between all OCD cases and controls
Region	Beta	Cohen's D	T-statistic	P-value	P-value (FDR)
L 10d	-0.00173846	-0.0030423	-0.102035	0.918733	0.959436
L 10pp	-0.0114832	-0.0183958	-0.616973	0.537284	0.717804
L 10r	0.0152324	0.0202779	0.680096	0.496479	0.686193
L 10v	0.000148167	0.000311862	0.0104595	0.991655	0.996165
L 11l	0.0290379	0.0653912	2.19314	0.0283481	0.0990486
L 13l	0.0239685	0.0369955	1.24078	0.21475	0.408061
L 1	0.03743	0.0722658	2.42371	0.0154021	0.062977
L 23c	-0.0378187	-0.05225	-1.7524	0.0797729	0.208042
L 23d	0.0552752	0.070537	2.36573	0.0180368	0.0709174
L 24dd	0.0256896	0.0357683	1.19962	0.230348	0.427194
L 24dv	0.00751504	0.00599877	0.201191	0.840558	0.91713
L 25	-0.00295545	-0.00499058	-0.167378	0.86708	0.931458
L 2	0.0490651	0.0444288	1.49009	0.136271	0.301423
L 31a	-0.00237808	-0.00151262	-0.0507315	0.959542	0.980008
L 31pd	-0.0363572	-0.0313103	-1.05011	0.293725	0.499596
L 31pv	0.051292	0.055603	1.86486	0.0622661	0.174597
L 33pr	0.0332134	0.0388758	1.30385	0.192353	0.379514
L 3a	-0.0640899	-0.103184	-3.46068	0.00054381	0.00460535
L 3b	0.00345237	0.00799555	0.268161	0.788588	0.887076
L 43	-0.0435513	-0.0316415	-1.06122	0.288648	0.494108
L 44	-0.0674367	-0.0587408	-1.97009	0.0488886	0.146782
L 45	0.00519496	0.00818621	0.274555	0.78367	0.884181
L 46	0.00373769	0.00269338	0.0903328	0.928027	0.964232
L 47l	-0.0296849	-0.0489705	-1.64241	0.100574	0.244647
L 47m	0.0394419	0.0454511	1.52437	0.127486	0.287982
L 47s	-0.00533156	-0.00642731	-0.215564	0.829337	0.910664
L 4	-0.00986638	-0.0270849	-0.908395	0.363718	0.570252
L 52	0.0206124	0.0361206	1.21144	0.22579	0.42181
L 55b	0.0363891	0.0161782	0.542597	0.587434	0.755255
L 5L	0.0030319	0.0028983	0.0972054	0.922568	0.961449
L 5m	-0.00222997	-0.00384175	-0.128848	0.897484	0.948364
L 5mv	-0.0472969	-0.0543844	-1.82399	0.0682204	0.186459
L 6a	-0.0808668	-0.0785844	-2.63563	0.00842698	0.039963
L 6d	0.0430096	0.0605289	2.03006	0.0424086	0.132565
L 6ma	0.0066418	0.00664124	0.222739	0.823749	0.907598
L 6mp	-0.0572478	-0.0461356	-1.54733	0.121854	0.27928
L 6r	-0.0273642	-0.0373976	-1.25427	0.209809	0.402028
L 6v	0.053672	0.0504651	1.69254	0.0906126	0.227443
L 7AL	-0.0367721	-0.0198823	-0.666827	0.504917	0.692874
L 7Am	0.106444	0.0638388	2.14108	0.0323213	0.108876
L 7PC	0.0916086	0.0484656	1.62548	0.104131	0.250587
L 7PL	0.0020472	0.00106254	0.0356364	0.971574	0.98601
L 7Pm	-0.0189047	-0.00976128	-0.327382	0.743395	0.859924
L 7m	0.0417012	0.0364799	1.22349	0.221208	0.41608
L 8Ad	0.0188771	0.0130473	0.437589	0.661705	0.806741
L 8Av	0.0434672	0.0340758	1.14286	0.253156	0.454376
L 8BL	0.00135461	0.00127497	0.0427609	0.965894	0.983004
L 8BM	-0.0575156	-0.0772287	-2.59015	0.00962412	0.0442217
L 8C	0.0556519	0.0422651	1.41752	0.1564	0.330569
L 9-46d	-0.0395033	-0.0351529	-1.17899	0.238466	0.437211
L 9a	0.0528622	0.0776462	2.60416	0.00924016	0.0428904
L 9m	-0.0519375	-0.0953009	-3.19628	0.00140174	0.00982706
L 9p	0.0108591	0.0111267	0.373175	0.709036	0.838036
L A1	0.0908432	0.0891911	2.99136	0.00279239	0.0169411
L A4	-0.0349098	-0.0413863	-1.38805	0.165191	0.342871
L A5	-0.0231833	-0.0320928	-1.07635	0.281826	0.486726
L AAIC	0.00363683	0.00523316	0.175514	0.860684	0.928042
L AIP	-0.0819383	-0.032118	-1.0772	0.28145	0.486313
L AVI	-0.0414581	-0.0663253	-2.22447	0.0261662	0.0934058
L DVT	0.071222	0.0549585	1.84324	0.0653591	0.180835
L EC	0.0427707	0.0622659	2.08832	0.0368246	0.119733
L FEF	0.0725199	0.039547	1.32636	0.184788	0.36961
L FFC	-0.0676353	-0.0495358	-1.66137	0.0967083	0.238072
L FOP1	-0.071482	-0.079593	-2.66945	0.00762475	0.0370237
L FOP2	-0.0279833	-0.0333741	-1.11933	0.26306	0.465398
L FOP3	-0.043283	-0.0570663	-1.91393	0.055692	0.161071
L FOP4	0.0105674	0.012403	0.415982	0.677443	0.817318
L FOP5	-0.02982	-0.0446672	-1.49808	0.134181	0.298268
L FST	-0.0370026	-0.0149837	-0.502535	0.615316	0.775444
L H	-0.0725291	-0.136628	-4.58234	4.72217e-06	9.73808e-05
L IFJa	0.00432399	0.00258183	0.0865914	0.931	0.965699
L IFJp	-0.0163116	-0.009417	-0.315835	0.752143	0.865252
L IFSa	0.00555203	0.00370469	0.124251	0.901122	0.950309
L IFSp	0.0461603	0.0214872	0.720654	0.47116	0.665409
L IP0	0.021192	0.0161801	0.54266	0.587391	0.755252
L IP1	0.151216	0.0756097	2.53586	0.0112507	0.0497302
L IP2	-0.0950936	-0.0621123	-2.08317	0.0372918	0.120851
L IPS1	0.0220359	0.0153654	0.515337	0.606343	0.768819
L Ig	0.0338586	0.0506989	1.70038	0.0891288	0.2249
L LBelt	0.0175508	0.023739	0.796176	0.425972	0.626858
L LIPd	0.00926028	0.00304209	0.102028	0.918739	0.959436
L LIPv	-0.013848	-0.00550305	-0.184566	0.853578	0.924048
L LO1	0.00957187	0.00573765	0.192434	0.847411	0.920775
L LO2	0.00746261	0.00465049	0.155972	0.876062	0.93646
L LO3	0.0938936	0.0364386	1.22211	0.221731	0.416718
L MBelt	0.0246989	0.0415305	1.39288	0.163724	0.340759
L MIP	-0.0388057	-0.0155169	-0.520417	0.602799	0.766246
L MI	-0.0461395	-0.0786648	-2.63832	0.00836034	0.0397322
L MST	-0.176552	-0.0615287	-2.0636	0.0391129	0.125038
L MT	-0.0133236	-0.00448561	-0.150442	0.880423	0.938875
L OFC	-0.0233924	-0.0471881	-1.58263	0.113576	0.266019
L OP1	-0.0884884	-0.085785	-2.87712	0.004032	0.0225791
L OP2-3	0.0462555	0.0665971	2.23359	0.0255591	0.0918217
L OP4	-0.0105313	-0.0148833	-0.499168	0.617686	0.777165
L PBelt	-0.0269641	-0.0405648	-1.36049	0.173742	0.354553
L PCV	-0.126923	-0.0849229	-2.84821	0.00441648	0.0242271
L PEF	-0.0402946	-0.0219116	-0.734887	0.462447	0.658211
L PF	0.00671491	0.00909056	0.304886	0.760467	0.869895
L PFcm	0.0524302	0.0593106	1.98921	0.0467387	0.142124
L PFm	0.00641584	0.00624332	0.209393	0.834151	0.913408
L PFop	0.097064	0.0570112	1.91209	0.0559285	0.161582
L PFt	0.00010915	6.98659e-05	0.00234322	0.99813	0.999103
L PGi	0.0156941	0.0112279	0.376568	0.706512	0.836395
L PGp	-0.012928	-0.00963319	-0.323086	0.746645	0.862001
L PGs	-0.0226754	-0.0255792	-0.857895	0.390996	0.595798
L PHA1	-0.0123339	-0.0220607	-0.739887	0.459407	0.655642
L PHA2	-0.00463968	-0.00474819	-0.159249	0.87348	0.934821
L PHA3	0.0315194	0.027718	0.929627	0.352614	0.559653
L PHT	0.0184777	0.0145226	0.487072	0.626231	0.782949
L PH	0.069165	0.0379041	1.27126	0.203703	0.3942
L PIT	-0.0564485	-0.0306412	-1.02767	0.304161	0.510435
L PI	-0.0215474	-0.0361064	-1.21096	0.225973	0.422011
L POS1	0.0475277	0.0520435	1.74548	0.0809702	0.210257
L POS2	-0.023878	-0.0206469	-0.692472	0.488677	0.680002
L PSL	-0.0176851	-0.0152871	-0.512712	0.608178	0.77025
L PeEc	0.03064	0.0298391	1.00077	0.316994	0.523838
L Pir	-0.0164485	-0.0279201	-0.936408	0.349114	0.556365
L PoI1	0.00216289	0.00384195	0.128854	0.897479	0.948364
L PoI2	0.00582177	0.00911226	0.305614	0.759913	0.869631
L PreS	-0.0600159	-0.103439	-3.46922	0.000526851	0.00448928
L ProS	-0.182394	-0.164459	-5.51577	3.66663e-08	2.00594e-06
L RI	0.00843716	0.0121529	0.407594	0.683591	0.821332
L RSC	0.0290175	0.044524	1.49328	0.135434	0.300109
L SCEF	-0.0267117	-0.0318785	-1.06917	0.285052	0.490331
L SFL	-0.020903	-0.0210054	-0.704496	0.481161	0.673905
L STGa	-0.0626993	-0.0703352	-2.35896	0.0183687	0.0719137
L STSda	0.0545695	0.0657873	2.20643	0.0274044	0.0966736
L STSdp	0.0119905	0.00792746	0.265877	0.790346	0.888043
L STSva	0.0763376	0.058005	1.94542	0.0517867	0.152919
L STSvp	-0.00996998	-0.0088325	-0.296231	0.767067	0.874196
L STV	-0.0182239	-0.012491	-0.418934	0.675284	0.815974
L TA2	-0.0311731	-0.0470066	-1.57654	0.114971	0.268279
L TE1a	-0.00397112	-0.00424245	-0.142286	0.88686	0.942669
L TE1m	-0.0374401	-0.025204	-0.84531	0.397982	0.602151
L TE1p	0.0232814	0.021898	0.734432	0.462724	0.658421
L TE2a	-0.0269082	-0.031866	-1.06875	0.28524	0.490528
L TE2p	0.00793984	0.00564386	0.189288	0.849875	0.922098
L TF	-0.0122606	-0.00957998	-0.321301	0.747997	0.862843
L TGd	-0.0320239	-0.0624984	-2.09612	0.0361272	0.118082
L TGv	0.0343081	0.0382987	1.28449	0.199036	0.3883
L TPOJ1	0.0444252	0.0236468	0.793085	0.42777	0.628422
L TPOJ2	0.037817	0.0179237	0.601138	0.547778	0.725996
L TPOJ3	0.0338848	0.00950175	0.318677	0.749986	0.863986
L V1	-0.0287288	-0.0634077	-2.12662	0.0335061	0.111782
L V2	0.016923	0.0346924	1.16354	0.244671	0.444511
L V3A	0.0198088	0.0198763	0.666625	0.505046	0.692965
L V3B	0.0550325	0.0388521	1.30305	0.192624	0.379896
L V3CD	-0.0362418	-0.0211178	-0.708265	0.478817	0.67178
L V3	0.00482819	0.00882583	0.296007	0.767238	0.874275
L V4	0.0357131	0.0474071	1.58998	0.11191	0.263393
L V4t	0.0518673	0.0270727	0.907985	0.363935	0.570448
L V6A	0.0524762	0.0312263	1.04729	0.295021	0.500934
L V6	0.0224832	0.0201434	0.675585	0.499339	0.688621
L V7	0.0513636	0.0395583	1.32674	0.184663	0.369442
L V8	-0.0399669	-0.0244704	-0.820708	0.411856	0.61444
L VIP	-0.0793534	-0.0376626	-1.26316	0.206598	0.397763
L VMV1	0.0329894	0.0271527	0.91067	0.362518	0.569086
L VMV2	-0.0527889	-0.0388646	-1.30347	0.192481	0.379724
L VMV3	0.0936543	0.0749564	2.51395	0.0119734	0.0521535
L VVC	-0.0178666	-0.013505	-0.452941	0.650613	0.799339
L a10p	0.025956	0.0288449	0.967422	0.333385	0.540491
L a24	0.0445135	0.0344845	1.15657	0.24751	0.447872
L a24pr	-0.0406673	-0.0457867	-1.53563	0.124699	0.283747
L a32pr	0.052676	0.0435172	1.45952	0.144493	0.313763
L a47r	0.00985544	0.0178818	0.599732	0.548715	0.726702
L a9-46v	-0.010456	-0.00806979	-0.270651	0.786672	0.885924
L d23ab	0.0867024	0.12017	4.03034	5.66133e-05	0.000737923
L d32	0.0548881	0.0572207	1.91911	0.0550331	0.15976
L i6-8	-0.0518319	-0.0266377	-0.893395	0.371693	0.577936
L p10p	0.0362784	0.0382955	1.28438	0.199074	0.388325
L p24	-0.072655	-0.0670743	-2.24959	0.024523	0.0890417
L p24pr	0.017054	0.0238862	0.801113	0.423108	0.624348
L p32	-0.0503529	-0.0328526	-1.10184	0.270592	0.473945
L p32pr	0.0665108	0.0592267	1.98639	0.0470501	0.142764
L p47r	0.00240686	0.00203161	0.0681376	0.945679	0.97294
L p9-46v	0.0480443	0.0266082	0.892407	0.372223	0.578435
L pOFC	-0.0580452	-0.0723581	-2.4268	0.0152715	0.0625775
L s32	0.0144765	0.0168128	0.563881	0.572863	0.744367
L s6-8	-0.0957087	-0.0505614	-1.69577	0.089999	0.226424
L v23ab	0.118163	0.0952044	3.19304	0.00141751	0.00990982
R 10d	0.0378598	0.0579399	1.94323	0.0520502	0.153495
R 10pp	0.00367463	0.00660855	0.221643	0.824602	0.90807
R 10r	-0.0127128	-0.0116685	-0.391346	0.69556	0.829221
R 10v	-0.0417939	-0.0942754	-3.16188	0.00157792	0.0108024
R 11l	0.0344108	0.0731201	2.45236	0.0142299	0.0593339
R 13l	0.0317906	0.0434273	1.4565	0.145324	0.314962
R 1	0.0544489	0.0762314	2.55671	0.0105992	0.0476115
R 23c	-0.0626933	-0.0673734	-2.25962	0.0238922	0.0873894
R 23d	0.0357657	0.0438907	1.47204	0.141079	0.308725
R 24dd	0.0156795	0.0219362	0.735713	0.461944	0.657718
R 24dv	0.0490865	0.036537	1.22541	0.220486	0.415174
R 25	-0.0521213	-0.0881131	-2.95521	0.00314076	0.018579
R 2	-0.0163493	-0.0151363	-0.507654	0.611721	0.772833
R 31a	0.0536978	0.0261441	0.87684	0.38062	0.586221
R 31pd	0.0634022	0.0444975	1.49239	0.135666	0.300458
R 31pv	0.0355069	0.0311931	1.04618	0.295535	0.501406
R 33pr	0.0515962	0.0605357	2.0303	0.0423851	0.132509
R 3a	-0.0170438	-0.0269992	-0.90552	0.365238	0.571689
R 3b	0.0155194	0.030904	1.03648	0.300033	0.506021
R 43	-0.133577	-0.10587	-3.55074	0.00038807	0.00350659
R 44	0.0122673	0.010476	0.351353	0.72534	0.84865
R 45	-0.0267695	-0.0337316	-1.13132	0.257982	0.459842
R 46	0.0435375	0.0327099	1.09705	0.272677	0.476408
R 47l	-0.0116632	-0.0187083	-0.627452	0.530395	0.712618
R 47m	0.064374	0.0792595	2.65827	0.00788206	0.0379612
R 47s	0.00828674	0.00814541	0.273187	0.784722	0.884772
R 4	-0.0213321	-0.049651	-1.66523	0.0959355	0.23675
R 52	0.0546806	0.0903707	3.03092	0.00245191	0.01531
R 55b	0.152207	0.0703585	2.35974	0.0183303	0.0717944
R 5L	-0.0018723	-0.00195048	-0.0654168	0.947845	0.974019
R 5m	-0.0105081	-0.0195902	-0.657032	0.511194	0.697704
R 5mv	-0.0399944	-0.037004	-1.24107	0.214644	0.407937
R 6a	-0.128334	-0.0992699	-3.32939	0.000877345	0.00676841
R 6d	-0.0125552	-0.0190975	-0.640508	0.521875	0.706031
R 6ma	0.00549184	0.00623458	0.2091	0.834379	0.913583
R 6mp	0.0528316	0.0432985	1.45218	0.146521	0.316584
R 6r	-0.0477633	-0.0548135	-1.83838	0.0660726	0.182245
R 6v	0.0239989	0.0266042	0.892272	0.372295	0.578508
R 7AL	-0.0173527	-0.0086808	-0.291143	0.770955	0.876461
R 7Am	0.0263028	0.0139078	0.466451	0.640915	0.792935
R 7PC	0.177001	0.0915866	3.0717	0.0021411	0.01376
R 7PL	0.035324	0.0161086	0.540264	0.589042	0.756558
R 7Pm	-0.0620538	-0.0259998	-0.872001	0.383254	0.588591
R 7m	-0.00255077	-0.00225701	-0.0756974	0.939663	0.969741
R 8Ad	-0.0572622	-0.0321068	-1.07682	0.281617	0.486513
R 8Av	0.0512803	0.040803	1.36848	0.17123	0.351179
R 8BL	0.0219136	0.0281647	0.944609	0.344909	0.5522
R 8BM	-0.0232542	-0.031436	-1.05433	0.29179	0.497523
R 8C	-0.00454612	-0.00275951	-0.0925508	0.926265	0.963306
R 9-46d	-0.0166642	-0.0160966	-0.53986	0.58932	0.756752
R 9a	0.0299526	0.0355639	1.19277	0.233023	0.430511
R 9m	-0.0307796	-0.0713059	-2.39151	0.0168198	0.0673151
R 9p	0.0591614	0.0469077	1.57323	0.115736	0.269475
R A1	0.0329792	0.0337978	1.13354	0.257049	0.458904
R A4	-0.0192124	-0.0307211	-1.03035	0.302901	0.509151
R A5	-0.00964875	-0.0183311	-0.614802	0.538716	0.718946
R AAIC	-0.00491067	-0.00678532	-0.227571	0.81999	0.905368
R AIP	-0.107395	-0.0429338	-1.43995	0.149952	0.321538
R AVI	-0.034294	-0.0445529	-1.49425	0.13518	0.299774
R DVT	0.0627229	0.0515658	1.72946	0.0837961	0.215266
R EC	-0.0220548	-0.0350064	-1.17407	0.240429	0.439548
R FEF	0.102918	0.0586714	1.96777	0.0491561	0.14733
R FFC	0.0459274	0.0347577	1.16573	0.243785	0.443517
R FOP1	-0.0421582	-0.0500464	-1.6785	0.0933195	0.232264
R FOP2	-0.0335625	-0.0401301	-1.34592	0.178397	0.360975
R FOP3	-0.00968845	-0.0122561	-0.411056	0.681051	0.819633
R FOP4	-0.00222918	-0.00271981	-0.091219	0.927323	0.963879
R FOP5	-0.0450099	-0.059348	-1.99046	0.0466004	0.141841
R FST	-0.0163511	-0.00589562	-0.197732	0.843264	0.918655
R H	-0.0547866	-0.100274	-3.36307	0.000777235	0.00614113
R IFJa	-0.0373702	-0.0155941	-0.523005	0.600996	0.765054
R IFJp	-0.0722796	-0.0399369	-1.33944	0.180496	0.363878
R IFSa	0.0206757	0.0172312	0.577915	0.56335	0.737416
R IFSp	0.0321977	0.0154723	0.518921	0.603841	0.767052
R IP0	-0.0320898	-0.0230135	-0.771845	0.440247	0.639568
R IP1	0.0262019	0.0136479	0.457734	0.647166	0.797257
R IP2	0.00508716	0.00266493	0.0893784	0.928785	0.964579
R IPS1	-0.126561	-0.0666246	-2.23451	0.0254984	0.0916783
R Ig	0.0133484	0.0192038	0.644073	0.519561	0.704151
R LBelt	-0.0211447	-0.0251156	-0.842347	0.399639	0.603701
R LIPd	-0.105019	-0.0318916	-1.06961	0.284854	0.490165
R LIPv	-0.098774	-0.03286	-1.10209	0.270483	0.473825
R LO1	-0.035075	-0.017203	-0.576966	0.563991	0.737936
R LO2	0.0860905	0.0567635	1.90378	0.0570026	0.163792
R LO3	-0.00142755	-0.000590929	-0.019819	0.984189	0.992494
R MBelt	0.0243189	0.0359141	1.20451	0.228454	0.424963
R MIP	-0.0268369	-0.00924362	-0.31002	0.75656	0.867758
R MI	-0.0376429	-0.0557055	-1.8683	0.0617857	0.173647
R MST	-0.18426	-0.0653871	-2.193	0.028358	0.0990671
R MT	0.072654	0.0282913	0.948855	0.342745	0.550186
R OFC	-0.00387077	-0.00799183	-0.268036	0.788684	0.887144
R OP1	-0.0360217	-0.0310845	-1.04254	0.297219	0.503218
R OP2-3	0.0208518	0.0268664	0.901065	0.367602	0.573945
R OP4	-0.0344409	-0.0462718	-1.5519	0.120757	0.277498
R PBelt	-0.00740538	-0.0119935	-0.402247	0.687521	0.823925
R PCV	-0.0609458	-0.0353828	-1.1867	0.23541	0.433543
R PEF	-0.125273	-0.084366	-2.82953	0.00468222	0.0253609
R PF	0.0218677	0.0272758	0.914797	0.360347	0.567122
R PFcm	0.0755212	0.0735761	2.46765	0.0136371	0.0575266
R PFm	-0.0213069	-0.0200655	-0.672974	0.500998	0.689838
R PFop	0.00915185	0.00446728	0.149827	0.880908	0.939213
R PFt	-0.0289988	-0.0146738	-0.492141	0.622644	0.780433
R PGi	-0.0278618	-0.0207734	-0.696713	0.486018	0.677744
R PGp	0.00391519	0.00389963	0.130789	0.895948	0.947583
R PGs	0.0794667	0.0608096	2.03948	0.0414604	0.130366
R PHA1	-0.0457677	-0.0698202	-2.34168	0.0192403	0.0744246
R PHA2	0.00888711	0.0122321	0.41025	0.681642	0.82001
R PHA3	-0.0139603	-0.0164405	-0.551395	0.58139	0.750794
R PHT	0.0556853	0.0377683	1.2667	0.205327	0.396174
R PH	-0.0441786	-0.0223272	-0.748826	0.454001	0.651246
R PIT	-0.0494674	-0.0338819	-1.13636	0.255867	0.45758
R PI	0.0148826	0.0256158	0.859124	0.390318	0.595155
R POS1	0.0546839	0.0597616	2.00433	0.0450944	0.138525
R POS2	0.0159435	0.0128894	0.432296	0.665547	0.809347
R PSL	0.0082212	0.00847872	0.284366	0.776143	0.879554
R PeEc	-0.00252171	-0.002344	-0.0786149	0.937342	0.968609
R Pir	-0.00540737	-0.00988326	-0.331472	0.740303	0.858155
R PoI1	0.0230828	0.0441398	1.48039	0.138838	0.30542
R PoI2	0.0272586	0.0424064	1.42226	0.155021	0.328653
R PreS	-0.0500366	-0.0784738	-2.63191	0.00851944	0.0403074
R ProS	-0.118606	-0.123652	-4.14714	3.42837e-05	0.000492159
R RI	-0.000825646	-0.00128118	-0.0429692	0.965728	0.982946
R RSC	0.00705047	0.0108844	0.365049	0.715092	0.842028
R SCEF	0.00499462	0.00675519	0.226561	0.820776	0.90581
R SFL	-0.0568938	-0.0462025	-1.54957	0.121314	0.278378
R STGa	-0.0701841	-0.0670336	-2.24822	0.0246099	0.0892783
R STSda	-4.32437e-05	-5.9067e-05	-0.00198104	0.998419	0.999268
R STSdp	-0.01594	-0.0218228	-0.731911	0.464261	0.659694
R STSva	-0.0480726	-0.0631461	-2.11784	0.034243	0.113554
R STSvp	0.0272622	0.0434825	1.45835	0.144814	0.314242
R STV	-0.00012084	-8.47313e-05	-0.00284178	0.997733	0.998904
R TA2	-0.0278564	-0.0423958	-1.4219	0.155124	0.328785
R TE1a	-0.00449313	-0.00485726	-0.162907	0.870599	0.933349
R TE1m	0.0261515	0.0216483	0.726057	0.467841	0.662615
R TE1p	0.0190601	0.0186019	0.623885	0.532735	0.71426
R TE2a	-0.0359355	-0.0456697	-1.53171	0.125665	0.28524
R TE2p	-0.100284	-0.0728059	-2.44182	0.0146515	0.0606173
R TF	0.0347759	0.0276421	0.927082	0.353934	0.561047
R TGd	-0.0267647	-0.0573086	-1.92206	0.054661	0.159022
R TGv	0.0237288	0.0336148	1.1274	0.259634	0.461766
R TPOJ1	-0.040492	-0.0298798	-1.00213	0.316334	0.523102
R TPOJ2	0.101329	0.05755	1.93016	0.05365	0.156962
R TPOJ3	0.0777748	0.0312838	1.04922	0.294132	0.499986
R V1	-0.027318	-0.0544849	-1.82736	0.0677123	0.185482
R V2	0.0152326	0.0311189	1.04369	0.296685	0.502591
R V3A	0.0156559	0.0131972	0.442618	0.658063	0.804237
R V3B	-0.00607684	-0.00353503	-0.118561	0.905629	0.952439
R V3CD	0.0934078	0.0496175	1.66411	0.0961597	0.237137
R V3	-0.00431407	-0.0072425	-0.242905	0.80809	0.898669
R V4	0.0262089	0.0332395	1.11481	0.26499	0.4677
R V4t	0.0507045	0.0291093	0.976291	0.328973	0.536094
R V6A	0.0459364	0.0287497	0.96423	0.334982	0.542078
R V6	-0.0301871	-0.0322004	-1.07996	0.280217	0.484861
R V7	0.00244422	0.00205631	0.0689662	0.94502	0.972581
R V8	0.0544914	0.0333787	1.11948	0.262995	0.465334
R VIP	-0.0154051	-0.00617084	-0.206962	0.836049	0.914545
R VMV1	0.0671137	0.0573747	1.92428	0.0543825	0.158445
R VMV2	-0.0468631	-0.0423581	-1.42064	0.155491	0.329258
R VMV3	0.0250424	0.022029	0.738827	0.46005	0.656209
R VVC	0.0117112	0.0112063	0.375847	0.707049	0.83676
R a10p	-0.00548456	-0.00608272	-0.204007	0.838357	0.915925
R a24	-0.0137473	-0.0134689	-0.45173	0.651485	0.799941
R a24pr	0.00639914	0.00633868	0.212592	0.831655	0.911964
R a32pr	0.0379319	0.0345191	1.15773	0.247036	0.447262
R a47r	-0.00273825	-0.00445908	-0.149552	0.881125	0.939363
R a9-46v	-0.0461503	-0.0288665	-0.968149	0.333022	0.540146
R d23ab	0.051425	0.0579482	1.94351	0.0520165	0.15343
R d32	0.0110164	0.013734	0.46062	0.645093	0.795897
R i6-8	-0.0168915	-0.0103416	-0.346843	0.728725	0.850684
R p10p	0.0318943	0.0252681	0.847461	0.396783	0.601023
R p24	0.0443029	0.035268	1.18284	0.236933	0.435344
R p24pr	0.0344051	0.0429789	1.44146	0.149524	0.320875
R p32	0.0648807	0.0448611	1.50459	0.132501	0.295863
R p32pr	0.00990286	0.00922448	0.309378	0.757048	0.86803
R p47r	0.030113	0.0240735	0.807396	0.419481	0.621043
R p9-46v	0.0291348	0.0187822	0.629931	0.528771	0.711371
R pOFC	-0.0292645	-0.0397935	-1.33462	0.182066	0.366004
R s32	-0.0240287	-0.027855	-0.934222	0.350239	0.557289
R s6-8	0.0249649	0.0185409	0.62184	0.534079	0.715341
R v23ab	0.0828208	0.0741646	2.48739	0.0129043	0.0551759

## Sheet: Table S13
Table S15: Results of linear regression models comparing cortical MIND network node degree in regions defined by the HCP-MMP parcellation between all OCD cases and controls
Region	Beta	Cohen's D	T-statistic	P-value	P-value (FDR)
L 10d	0.000137035	0.0190688	0.639546	0.5225	0.70649
L 10pp	-0.000405294	-0.0491394	-1.64808	0.0994066	0.242722
L 10r	-0.000120511	-0.0104125	-0.349223	0.726938	0.849609
L 10v	-0.000124278	-0.0168702	-0.565805	0.571554	0.743361
L 11l	-0.000115446	-0.0119188	-0.399741	0.689366	0.825202
L 13l	0.000263983	0.0268296	0.899832	0.368258	0.574603
L 1	0.000478036	0.0546269	1.83212	0.0669997	0.184079
L 23c	0.000270661	0.0382293	1.28216	0.199851	0.389296
L 23d	-0.000622783	-0.0673011	-2.2572	0.0240435	0.0878049
L 24dd	-0.000250329	-0.0295615	-0.991456	0.321516	0.528445
L 24dv	0.000244593	0.0290312	0.973672	0.330272	0.537403
L 25	5.67808e-05	0.00464088	0.155649	0.876316	0.936593
L 2	5.47674e-05	0.00501789	0.168294	0.86636	0.93109
L 31a	0.000160085	0.0164642	0.552189	0.580846	0.750344
L 31pd	-7.39888e-05	-0.00847726	-0.284317	0.77618	0.879573
L 31pv	-0.00048261	-0.0618603	-2.07472	0.0380691	0.122663
L 33pr	-0.000286222	-0.0301497	-1.01118	0.311983	0.518611
L 3a	0.000469463	0.0648114	2.17369	0.0297799	0.102585
L 3b	0.00152955	0.128632	4.31415	1.63644e-05	0.00026883
L 43	-0.0001102	-0.0104017	-0.348862	0.72721	0.849771
L 44	4.57196e-05	0.00506624	0.169915	0.865084	0.930489
L 45	-0.000365254	-0.0434919	-1.45866	0.144727	0.314106
L 46	-4.10267e-05	-0.00463874	-0.155578	0.876373	0.936612
L 47l	-0.000375102	-0.0440837	-1.47851	0.139341	0.306159
L 47m	-0.000228435	-0.0216209	-0.725138	0.468405	0.663119
L 47s	-0.000168478	-0.0152855	-0.512657	0.608216	0.77025
L 4	0.000186947	0.0222192	0.745206	0.456186	0.65311
L 52	3.31133e-05	0.00729269	0.244588	0.806787	0.897916
L 55b	-0.000539079	-0.0489173	-1.64063	0.100944	0.245265
L 5L	0.00106217	0.0954437	3.20106	0.00137871	0.00969751
L 5m	0.00045868	0.0472826	1.5858	0.112855	0.264925
L 5mv	-4.64857e-05	-0.00505724	-0.169614	0.865322	0.930624
L 6a	0.000353984	0.0379427	1.27255	0.203243	0.393645
L 6d	-0.000402149	-0.0384012	-1.28793	0.197837	0.386857
L 6ma	-5.77072e-05	-0.0062308	-0.208973	0.834478	0.9136
L 6mp	-0.000520784	-0.0526347	-1.7653	0.0775804	0.204035
L 6r	-5.24603e-05	-0.00548613	-0.183998	0.854023	0.924351
L 6v	1.5263e-05	0.00143673	0.0481862	0.96157	0.980947
L 7AL	5.24225e-05	0.00471139	0.158014	0.874453	0.935419
L 7Am	0.00044155	0.0389658	1.30686	0.191325	0.378237
L 7PC	0.000183564	0.0180946	0.606871	0.543967	0.723067
L 7PL	-0.000181582	-0.0145945	-0.489481	0.624525	0.781715
L 7Pm	0.000135695	0.0116641	0.391199	0.695669	0.829305
L 7m	1.92117e-05	0.00207821	0.0697006	0.944435	0.972315
L 8Ad	0.000338704	0.0366791	1.23017	0.218697	0.413009
L 8Av	-5.18551e-05	-0.00561989	-0.188484	0.850506	0.922455
L 8BL	0.000229427	0.0216062	0.724646	0.468707	0.663362
L 8BM	-0.000542377	-0.0445276	-1.4934	0.135402	0.300072
L 8C	-0.000476831	-0.0529043	-1.77434	0.0760735	0.201355
L 9-46d	0.000261999	0.0311843	1.04588	0.295671	0.501546
L 9a	-0.000434212	-0.051922	-1.7414	0.0816818	0.211485
L 9m	-0.000231167	-0.0251361	-0.843034	0.399254	0.603335
L 9p	0.000165896	0.0185112	0.620843	0.534734	0.715878
L A1	-0.000336562	-0.0449478	-1.50749	0.131754	0.294579
L A4	-0.000807618	-0.0884217	-2.96556	0.00303718	0.0180978
L A5	-0.00044079	-0.0499263	-1.67447	0.0941078	0.233653
L AAIC	1.65218e-05	0.00140196	0.04702	0.962499	0.981449
L AIP	0.000119691	0.00754625	0.253092	0.800209	0.89403
L AVI	0.000305102	0.0422059	1.41554	0.156981	0.331324
L DVT	-0.000231477	-0.0226718	-0.760386	0.447064	0.645406
L EC	0.000613951	0.0700911	2.35077	0.0187775	0.0730999
L FEF	-0.000355304	-0.0335782	-1.12617	0.260152	0.462262
L FFC	0.000182892	0.0196875	0.660293	0.509099	0.696139
L FOP1	-0.00075231	-0.0667679	-2.23931	0.0251841	0.0908758
L FOP2	-9.3791e-05	-0.0103037	-0.345573	0.72968	0.851234
L FOP3	0.000339113	0.0525089	1.76108	0.0782921	0.20534
L FOP4	8.82258e-05	0.010829	0.363191	0.716479	0.842896
L FOP5	0.000181412	0.0304164	1.02013	0.307723	0.514279
L FST	2.01862e-05	0.00170875	0.0573093	0.954301	0.977306
L H	0.000226803	0.0695174	2.33153	0.0197694	0.0759079
L IFJa	-0.000157117	-0.0149111	-0.500099	0.61703	0.776663
L IFJp	-0.000299686	-0.0252557	-0.847047	0.397014	0.601261
L IFSa	-4.51984e-05	-0.00488735	-0.163916	0.869805	0.932913
L IFSp	-0.000285181	-0.0298796	-1.00213	0.316337	0.523102
L IP0	8.81579e-05	0.0089407	0.29986	0.764298	0.872422
L IP1	-0.000201319	-0.0191873	-0.643519	0.51992	0.704386
L IP2	8.14307e-05	0.00862697	0.289338	0.772336	0.877249
L IPS1	1.84173e-05	0.00144255	0.0483813	0.961414	0.980847
L Ig	-0.00018006	-0.0329776	-1.10603	0.268773	0.471943
L LBelt	0.000477261	0.0650389	2.18133	0.0292107	0.101192
L LIPd	4.04474e-05	0.00254592	0.0853869	0.931958	0.966206
L LIPv	0.00030478	0.0239814	0.804308	0.421261	0.622688
L LO1	0.000738218	0.0603738	2.02486	0.0429402	0.13379
L LO2	0.000705849	0.0636768	2.13564	0.0327623	0.109956
L LO3	-0.000172271	-0.0152855	-0.512656	0.608217	0.77025
L MBelt	-0.000178813	-0.0220001	-0.737857	0.46064	0.656638
L MIP	0.000520338	0.0396016	1.32819	0.184183	0.368873
L MI	0.000266953	0.0268744	0.901336	0.367458	0.573811
L MST	8.59531e-05	0.00629374	0.211084	0.832831	0.912576
L MT	-0.000338981	-0.0272103	-0.912599	0.361502	0.568166
L OFC	0.000290536	0.0341583	1.14563	0.25201	0.453028
L OP1	-2.93964e-05	-0.00292704	-0.0981694	0.921802	0.961021
L OP2-3	-0.000346968	-0.048122	-1.61395	0.106608	0.25475
L OP4	-9.46308e-05	-0.00929102	-0.31161	0.755352	0.867058
L PBelt	-0.0005398	-0.0604851	-2.0286	0.0425579	0.132875
L PCV	0.000574999	0.055609	1.86506	0.0622383	0.174538
L PEF	-0.000127996	-0.0113224	-0.379741	0.704156	0.834848
L PF	-0.000181095	-0.0228963	-0.767913	0.442579	0.641519
L PFcm	-0.000593437	-0.0642913	-2.15625	0.0311168	0.105915
L PFm	-7.93773e-05	-0.00848615	-0.284615	0.775952	0.87944
L PFop	0.00018888	0.0158752	0.532436	0.59445	0.760464
L PFt	-0.000422077	-0.0468353	-1.5708	0.1163	0.270349
L PGi	-0.000527605	-0.054632	-1.83229	0.0669741	0.184035
L PGp	2.56154e-05	0.00258381	0.0866579	0.930947	0.965682
L PGs	-0.000149256	-0.0166305	-0.557765	0.577032	0.747434
L PHA1	-3.11246e-05	-0.0029697	-0.0996	0.920666	0.960332
L PHA2	0.000324266	0.0361338	1.21188	0.225621	0.421572
L PHA3	-0.000690091	-0.0796638	-2.67183	0.00757105	0.0368272
L PHT	-9.72627e-05	-0.0104382	-0.350084	0.726292	0.849194
L PH	-0.000255975	-0.0281755	-0.944971	0.344724	0.552044
L PIT	-3.77321e-05	-0.00320826	-0.107601	0.914317	0.957069
L PI	-2.10887e-05	-0.00276152	-0.0926179	0.926211	0.963268
L POS1	-0.000146685	-0.0135817	-0.455512	0.648763	0.798181
L POS2	0.000303047	0.0320636	1.07537	0.282265	0.487238
L PSL	-0.000118554	-0.0119156	-0.399634	0.689445	0.825239
L PeEc	0.000277134	0.0290437	0.974091	0.330063	0.537167
L Pir	-9.48937e-05	-0.00961141	-0.322355	0.747199	0.862353
L PoI1	0.000262429	0.0295758	0.991935	0.321283	0.528197
L PoI2	0.00097222	0.0790424	2.65098	0.00805379	0.0385932
L PreS	0.000187495	0.028676	0.961759	0.336222	0.543385
L ProS	0.00069218	0.0852859	2.86039	0.00425069	0.0235178
L RI	-7.91498e-05	-0.0162154	-0.543843	0.586576	0.754611
L RSC	0.000478581	0.0525865	1.76369	0.0778523	0.204505
L SCEF	6.78875e-05	0.00639948	0.214631	0.830065	0.911098
L SFL	-0.00022057	-0.020624	-0.691704	0.489159	0.680457
L STGa	-0.000273642	-0.0288337	-0.967046	0.333573	0.540669
L STSda	-0.000573577	-0.0482889	-1.61955	0.105399	0.252735
L STSdp	2.5005e-05	0.00213726	0.071681	0.942859	0.97151
L STSva	-0.000293378	-0.0301552	-1.01137	0.311894	0.518522
L STSvp	5.62998e-05	0.00581051	0.194877	0.845498	0.919847
L STV	-0.000489393	-0.049341	-1.65484	0.0980269	0.240312
L TA2	-0.00068301	-0.0637714	-2.13882	0.0325041	0.109328
L TE1a	0.000299278	0.0308402	1.03434	0.301031	0.50713
L TE1m	-0.000553716	-0.0535389	-1.79563	0.0726205	0.194799
L TE1p	-0.000292218	-0.0289079	-0.969537	0.332329	0.539474
L TE2a	-9.94929e-05	-0.0101235	-0.339531	0.734226	0.85414
L TE2p	-0.000112599	-0.011582	-0.388445	0.697705	0.830671
L TF	0.000143158	0.0157491	0.528204	0.597384	0.762554
L TGd	-6.60581e-05	-0.00702597	-0.235642	0.813721	0.901921
L TGv	-0.000216465	-0.0215603	-0.723107	0.469652	0.664138
L TPOJ1	-0.000310508	-0.0255864	-0.858137	0.390862	0.595646
L TPOJ2	-0.000546079	-0.0446946	-1.499	0.133943	0.297938
L TPOJ3	-0.000391385	-0.0286175	-0.959795	0.33721	0.544426
L V1	0.00105451	0.108098	3.62547	0.000291616	0.00278869
L V2	0.000928765	0.10422	3.49541	0.000477895	0.00414981
L V3A	0.000598172	0.0505137	1.69417	0.0903024	0.226919
L V3B	-0.00014321	-0.0141451	-0.474409	0.635232	0.788806
L V3CD	-0.000267053	-0.0225966	-0.757864	0.448572	0.646701
L V3	0.00122108	0.127256	4.26802	2.01265e-05	0.000318328
L V4	0.000401155	0.0437834	1.46844	0.142054	0.310154
L V4t	3.75993e-05	0.0034172	0.114609	0.90876	0.953975
L V6A	0.000161145	0.0136075	0.456378	0.64814	0.797824
L V6	-8.0501e-06	-0.000748015	-0.0250875	0.979986	0.990475
L V7	0.000343459	0.0288323	0.967001	0.333596	0.540685
L V8	-7.0013e-05	-0.00632869	-0.212256	0.831917	0.912054
L VIP	-0.000103877	-0.00857771	-0.287686	0.7736	0.878097
L VMV1	0.000182793	0.0152978	0.51307	0.607928	0.770054
L VMV2	0.000294152	0.0291284	0.976932	0.328655	0.535765
L VMV3	-0.000309825	-0.033733	-1.13136	0.257962	0.45982
L VVC	0.000466655	0.0443098	1.4861	0.137324	0.303016
L a10p	0.000653423	0.0611778	2.05183	0.0402439	0.127573
L a24	6.31089e-05	0.00637112	0.21368	0.830807	0.911545
L a24pr	-0.000406245	-0.0501412	-1.68167	0.0927014	0.231166
L a32pr	-0.000207812	-0.0263932	-0.885196	0.376098	0.581947
L a47r	-3.8721e-05	-0.00524383	-0.175872	0.860403	0.927896
L a9-46v	-0.000300147	-0.0296166	-0.993305	0.320614	0.527526
L d23ab	-8.68954e-05	-0.00955241	-0.320376	0.748698	0.863264
L d32	-0.000120357	-0.0131514	-0.441083	0.659174	0.805002
L i6-8	-0.000398063	-0.0401609	-1.34695	0.178064	0.360538
L p10p	-0.000724516	-0.0772877	-2.59213	0.00956903	0.0440342
L p24	0.00015645	0.0154271	0.517406	0.604898	0.767798
L p24pr	-0.000244772	-0.0279453	-0.93725	0.34868	0.555947
L p32	-0.000172502	-0.0200574	-0.672702	0.501171	0.689941
L p32pr	-0.00013981	-0.0186947	-0.626999	0.530692	0.712821
L p47r	-0.00025073	-0.0256134	-0.859044	0.390362	0.595189
L p9-46v	-0.000283003	-0.0309169	-1.03692	0.299831	0.505843
L pOFC	-6.85439e-05	-0.00750483	-0.251703	0.801282	0.894725
L s32	-3.05019e-06	-0.000295752	-0.00991916	0.992086	0.996342
L s6-8	-0.000341729	-0.0313112	-1.05014	0.293711	0.499592
L v23ab	0.000571234	0.0519031	1.74077	0.0817925	0.21166
R 10d	0.000316309	0.0430482	1.44378	0.148869	0.319916
R 10pp	0.000148178	0.019997	0.670675	0.502462	0.69094
R 10r	0.000211712	0.0187524	0.628934	0.529424	0.711822
R 10v	-8.52375e-05	-0.0118773	-0.398351	0.69039	0.825918
R 11l	0.000109068	0.0117155	0.392923	0.694395	0.82852
R 13l	0.000413725	0.0418051	1.40209	0.160956	0.336821
R 1	0.00141525	0.146206	4.90358	9.74106e-07	2.74093e-05
R 23c	0.000227912	0.0300117	1.00656	0.314202	0.5209
R 23d	0.000252352	0.0262825	0.881483	0.378103	0.583911
R 24dd	-0.000505361	-0.0624584	-2.09478	0.0362462	0.118373
R 24dv	-0.000114729	-0.0135677	-0.455044	0.649099	0.798371
R 25	1.51629e-05	0.00114608	0.0384383	0.96934	0.984809
R 2	0.0003067	0.0266833	0.894924	0.370875	0.5771
R 31a	-9.17561e-05	-0.00852465	-0.285906	0.774963	0.878867
R 31pd	-0.000318266	-0.0331439	-1.11161	0.266366	0.469288
R 31pv	-0.000169978	-0.0214135	-0.718182	0.472682	0.6668
R 33pr	-4.69778e-05	-0.00466227	-0.156367	0.875751	0.93624
R 3a	0.000375088	0.0524273	1.75835	0.0787563	0.20621
R 3b	0.00191188	0.137785	4.62113	3.92302e-06	8.37286e-05
R 43	-0.000969902	-0.0908414	-3.04671	0.00232698	0.0147017
R 44	-0.00011128	-0.0121071	-0.406057	0.68472	0.822053
R 45	-0.000330578	-0.0374811	-1.25707	0.208793	0.400732
R 46	2.47481e-06	0.000275821	0.00925069	0.99262	0.996571
R 47l	-0.00025327	-0.0308188	-1.03362	0.301367	0.507517
R 47m	0.000378739	0.0353558	1.18579	0.235768	0.434003
R 47s	-0.000245059	-0.0215831	-0.723872	0.469182	0.663746
R 4	-0.000188701	-0.0221671	-0.743458	0.457243	0.653967
R 52	-0.000328164	-0.0699577	-2.3463	0.019004	0.0737638
R 55b	0.000296721	0.026916	0.902729	0.366718	0.57305
R 5L	0.000379495	0.0359714	1.20644	0.227712	0.424082
R 5m	0.00048834	0.0542351	1.81898	0.0689811	0.187945
R 5mv	0.000167003	0.0163585	0.548643	0.583278	0.752183
R 6a	0.000938185	0.0959728	3.21881	0.00129635	0.00923489
R 6d	-5.96691e-05	-0.00501641	-0.168244	0.866399	0.931114
R 6ma	-0.00023691	-0.0244205	-0.819035	0.41281	0.615262
R 6mp	-0.000163291	-0.0149411	-0.501107	0.61632	0.776199
R 6r	-0.000575021	-0.0575808	-1.93119	0.053522	0.156705
R 6v	-0.000730264	-0.0741643	-2.48738	0.0129046	0.0551759
R 7AL	0.000409983	0.0367557	1.23274	0.217736	0.41183
R 7Am	0.000138277	0.0111645	0.374444	0.708092	0.837341
R 7PC	0.00026358	0.0242054	0.811821	0.416937	0.618794
R 7PL	0.000559833	0.0465775	1.56215	0.118322	0.273506
R 7Pm	0.000164715	0.0129447	0.434148	0.664202	0.808503
R 7m	0.000271697	0.0283352	0.950328	0.341997	0.549326
R 8Ad	5.06892e-05	0.00499662	0.16758	0.866921	0.931374
R 8Av	8.01721e-05	0.00987448	0.331178	0.740525	0.858306
R 8BL	0.000169601	0.0190226	0.637996	0.523508	0.707269
R 8BM	-0.000543591	-0.046613	-1.56334	0.118042	0.273075
R 8C	9.78829e-05	0.0104729	0.351247	0.725419	0.848674
R 9-46d	0.000176855	0.0200156	0.671298	0.502065	0.690593
R 9a	0.000582773	0.0638491	2.14142	0.0322935	0.108819
R 9m	6.99416e-05	0.00775462	0.260081	0.794813	0.890661
R 9p	0.000102325	0.0112947	0.378809	0.704847	0.835272
R A1	-0.000277372	-0.0395912	-1.32784	0.184298	0.369007
R A4	-0.000436503	-0.0557027	-1.8682	0.0617987	0.17367
R A5	-0.000533833	-0.0617941	-2.0725	0.0382757	0.123082
R AAIC	-0.000118355	-0.00971921	-0.325971	0.744462	0.860619
R AIP	0.000409914	0.0280706	0.941452	0.346524	0.553771
R AVI	0.000214909	0.0257367	0.863178	0.388086	0.593118
R DVT	0.000447426	0.0478228	1.60392	0.108802	0.258362
R EC	0.000285557	0.0350081	1.17413	0.240405	0.439514
R FEF	-0.000810091	-0.0653128	-2.19051	0.028538	0.0995296
R FFC	0.000579506	0.0589137	1.97589	0.0482276	0.14536
R FOP1	6.56953e-06	0.000583708	0.0195769	0.984382	0.992587
R FOP2	7.47827e-05	0.00949903	0.318586	0.750055	0.864026
R FOP3	-0.000115532	-0.0192316	-0.645003	0.518958	0.703702
R FOP4	0.000233881	0.0264612	0.887476	0.37487	0.580764
R FOP5	0.000485729	0.0744415	2.49668	0.0125717	0.0541291
R FST	0.000124447	0.0101407	0.340106	0.733793	0.85388
R H	9.10895e-05	0.0262492	0.880365	0.378709	0.584466
R IFJa	0.000153453	0.0137356	0.460675	0.645054	0.795893
R IFJp	0.000410713	0.0374239	1.25515	0.209489	0.40159
R IFSa	6.70156e-05	0.00703825	0.236054	0.813401	0.901756
R IFSp	-0.00025677	-0.025935	-0.869828	0.384441	0.589726
R IP0	0.000362009	0.0370859	1.24382	0.213632	0.406667
R IP1	-0.000111739	-0.0105265	-0.353045	0.724071	0.847976
R IP2	-0.000170361	-0.0154535	-0.518291	0.604281	0.767367
R IPS1	0.000885762	0.0655507	2.19849	0.0279647	0.0980768
R Ig	0.000165686	0.0283597	0.95115	0.341579	0.548864
R LBelt	-6.90487e-05	-0.00878167	-0.294526	0.768369	0.874894
R LIPd	0.00037376	0.0244164	0.818895	0.41289	0.615343
R LIPv	0.00134921	0.0961034	3.22319	0.00127673	0.00912721
R LO1	0.000365122	0.0313979	1.05305	0.292376	0.4982
R LO2	0.000315586	0.0273719	0.918021	0.358657	0.565561
R LO3	8.10797e-05	0.00717378	0.2406	0.809876	0.899756
R MBelt	-0.000389759	-0.0512075	-1.71744	0.0859681	0.21923
R MIP	0.000212536	0.0151168	0.506999	0.61218	0.773187
R MI	0.000423268	0.0406005	1.36169	0.173364	0.35407
R MST	0.00106709	0.0711595	2.3866	0.0170458	0.068002
R MT	-0.000446653	-0.0397699	-1.33383	0.182326	0.366342
R OFC	0.000443498	0.0510198	1.71114	0.0871236	0.221245
R OP1	-0.000322663	-0.0327894	-1.09972	0.271514	0.475103
R OP2-3	0.000129199	0.0208975	0.700876	0.483417	0.675771
R OP4	-0.000477352	-0.0458331	-1.53719	0.124318	0.283116
R PBelt	7.00745e-05	0.00721642	0.24203	0.808768	0.899092
R PCV	0.000769162	0.0760532	2.55073	0.0107825	0.0481888
R PEF	0.000359236	0.0297511	0.997817	0.318422	0.525235
R PF	-0.000315068	-0.0377754	-1.26694	0.205242	0.396102
R PFcm	-0.000144985	-0.0164469	-0.551608	0.581244	0.75068
R PFm	-0.000642212	-0.0755301	-2.53319	0.0113367	0.0500088
R PFop	0.000320546	0.0272172	0.91283	0.361381	0.56807
R PFt	-4.59195e-05	-0.00442575	-0.148434	0.882007	0.939815
R PGi	-0.000341547	-0.0331246	-1.11096	0.266646	0.469587
R PGp	-8.92689e-05	-0.009317	-0.312481	0.75469	0.866702
R PGs	-0.000184195	-0.0177148	-0.594134	0.552453	0.729578
R PHA1	-2.91315e-05	-0.00285033	-0.0955966	0.923845	0.962066
R PHA2	0.000144005	0.0168132	0.563894	0.572854	0.744366
R PHA3	-0.000205737	-0.0235497	-0.789829	0.429669	0.630198
R PHT	-0.00010984	-0.0108349	-0.36339	0.716331	0.842798
R PH	-8.84231e-05	-0.00910744	-0.305452	0.760036	0.869691
R PIT	-2.27041e-05	-0.00202475	-0.0679076	0.945862	0.973013
R PI	-0.000174019	-0.026581	-0.891494	0.372712	0.578854
R POS1	-0.000452047	-0.0396213	-1.32885	0.183965	0.3686
R POS2	0.000106743	0.0116998	0.392398	0.694783	0.828702
R PSL	-0.000748923	-0.0745297	-2.49963	0.0124674	0.0537855
R PeEc	5.99313e-05	0.00607353	0.203699	0.838598	0.916023
R Pir	7.50648e-05	0.00811263	0.272088	0.785567	0.885262
R PoI1	0.000306927	0.0386889	1.29758	0.194498	0.382466
R PoI2	-0.000149771	-0.0118877	-0.398698	0.690135	0.825732
R PreS	0.000515658	0.0627468	2.10445	0.0353942	0.116325
R ProS	0.00102401	0.118265	3.96648	7.40727e-05	0.000916211
R RI	0.000163702	0.0378541	1.26958	0.204299	0.394972
R RSC	0.000586821	0.0592867	1.9884	0.0468275	0.142299
R SCEF	-0.000369894	-0.0340303	-1.14134	0.253791	0.45516
R SFL	-4.85325e-05	-0.004185	-0.14036	0.888382	0.943515
R STGa	-0.00041099	-0.0380184	-1.27509	0.202343	0.392464
R STSda	-0.000461278	-0.0423567	-1.42059	0.155504	0.329269
R STSdp	0.000172525	0.0233463	0.783007	0.433664	0.633633
R STSva	1.66928e-05	0.00180378	0.0604965	0.951763	0.976039
R STSvp	-0.000198487	-0.0182802	-0.613095	0.539844	0.71981
R STV	-0.000231199	-0.0236522	-0.793265	0.427665	0.628332
R TA2	-0.000124659	-0.0121461	-0.407365	0.683759	0.821419
R TE1a	0.000384129	0.0382235	1.28197	0.19992	0.389363
R TE1m	-0.000121095	-0.0114717	-0.384748	0.700442	0.832401
R TE1p	-0.000248231	-0.0224076	-0.751524	0.452377	0.649765
R TE2a	-0.000324208	-0.0337126	-1.13068	0.25825	0.460167
R TE2p	2.11664e-05	0.00214324	0.0718818	0.942699	0.971398
R TF	-0.000614282	-0.072011	-2.41516	0.0157678	0.0641071
R TGd	-0.000170833	-0.0188938	-0.633675	0.526325	0.709648
R TGv	-6.18843e-05	-0.00678269	-0.227483	0.820059	0.905389
R TPOJ1	-4.65385e-05	-0.00401435	-0.134636	0.892905	0.945989
R TPOJ2	-0.000595347	-0.0596122	-1.99932	0.0456335	0.139731
R TPOJ3	-0.00020302	-0.0147127	-0.493447	0.621721	0.779842
R V1	0.000800946	0.0810125	2.71706	0.00661161	0.0331039
R V2	0.000721134	0.0796952	2.67288	0.00754738	0.036739
R V3A	0.000281681	0.02448	0.821029	0.411673	0.614274
R V3B	-5.82458e-05	-0.00527972	-0.177075	0.859457	0.927369
R V3CD	1.6856e-05	0.00136229	0.0456895	0.96356	0.981939
R V3	0.000726763	0.07345	2.46342	0.0137987	0.0580157
R V4	0.000542833	0.0580143	1.94573	0.0517492	0.152845
R V4t	1.32254e-05	0.00116437	0.0390517	0.968851	0.984491
R V6A	0.000644726	0.0499718	1.67599	0.0938088	0.233078
R V6	-6.3321e-05	-0.00600701	-0.201468	0.840342	0.917007
R V7	0.00041186	0.0355678	1.1929	0.232971	0.430448
R V8	0.000227392	0.0213211	0.715085	0.474594	0.668333
R VIP	0.000537735	0.0445289	1.49345	0.135391	0.300067
R VMV1	-7.36546e-05	-0.00692764	-0.232345	0.816281	0.903311
R VMV2	6.91582e-05	0.00713466	0.239288	0.810893	0.90034
R VMV3	-1.82816e-05	-0.00215386	-0.0722379	0.942416	0.971262
R VVC	0.000194542	0.0210692	0.706635	0.47983	0.672731
R a10p	0.000149016	0.012869	0.43161	0.666046	0.809697
R a24	-0.000211531	-0.0224836	-0.754071	0.450846	0.648469
R a24pr	-8.2628e-05	-0.00900137	-0.301895	0.762746	0.871285
R a32pr	-0.000167938	-0.0205272	-0.688456	0.491201	0.682091
R a47r	7.94937e-05	0.00980829	0.328958	0.742203	0.859267
R a9-46v	0.000186585	0.0178553	0.598846	0.549305	0.727186
R d23ab	0.000692185	0.0648629	2.17542	0.0296502	0.102268
R d32	-0.000191011	-0.0214344	-0.718882	0.472251	0.666399
R i6-8	7.38241e-05	0.00797339	0.267418	0.78916	0.88738
R p10p	6.65763e-05	0.00717243	0.240554	0.809911	0.899759
R p24	-0.000136463	-0.0154872	-0.519423	0.603491	0.766776
R p24pr	6.51936e-05	0.00737892	0.24748	0.804548	0.896734
R p32	-0.000245634	-0.0275697	-0.924653	0.355196	0.562334
R p32pr	1.16554e-05	0.0015221	0.0510494	0.959288	0.979868
R p47r	9.72947e-05	0.00873215	0.292866	0.769638	0.875634
R p9-46v	0.000282822	0.0311167	1.04362	0.296719	0.502627
R pOFC	-8.74982e-05	-0.00920288	-0.308654	0.757599	0.868344
R s32	0.000451719	0.0419636	1.40741	0.159375	0.334588
R s6-8	0.00025845	0.0252679	0.847454	0.396787	0.601023
R v23ab	5.16696e-05	0.00441443	0.148055	0.882306	0.93996

[truncated: 31 more sheets: Table S14, Table S15, Table S16, Table S17, Table S18, Table S19, Table S20, Table S21, Table S22, Table S23, Table S24, Table S25, Table S26, Table S27, Table S28, Table S29, Table S30, Table S31, Table S32, Table S33 …]
